# Supplementary material for: Patient and healthcare provider knowledge, attitudes and barriers to handover and healthcare communication during chronic disease inpatient care in India: a qualitative exploratory study
Source: PubMed Central journal article supplement (PMC6858202; doi:10.1136/bmjopen-2018-028199), 2019-11-11
Supplement: bmjopen-2018-028199.draft_revisions.pdf [file bmjopen-2018-028199.draft_revisions.pdf]

# BMJ Open

BMJ Open is committed to open peer review. As part of this commitment we make the peer review history of every article we publish publicly available.

When an article is published we post the peer reviewers' comments and the authors' responses online. We also post the versions of the paper that were used during peer review. These are the versions that the peer review comments apply to.

The versions of the paper that follow are the versions that were submitted during the peer review process. They are not the versions of record or the final published versions. They should not be cited or distributed as the published version of this manuscript.

BMJ Open is an open access journal and the full, final, typeset and author-corrected version of record of the manuscript is available on our site with no access controls, subscription charges or pay-per-view fees (<http://bmjopen.bmj.com>).

If you have any questions on BMJ Open's open peer review process please email [info.bmjopen@bmj.com](mailto:info.bmjopen@bmj.com)

# BMJ Open

## Investigating inpatient and healthcare provider knowledge, attitudes and barriers to handover communication in India: A qualitative study

|                               |                                                                                                                                                                                                                                                                                                                                                                                                                                                                                                                                                                                                                                                                                                                                                      |
|-------------------------------|------------------------------------------------------------------------------------------------------------------------------------------------------------------------------------------------------------------------------------------------------------------------------------------------------------------------------------------------------------------------------------------------------------------------------------------------------------------------------------------------------------------------------------------------------------------------------------------------------------------------------------------------------------------------------------------------------------------------------------------------------|
| Journal:                      | <i>BMJ Open</i>                                                                                                                                                                                                                                                                                                                                                                                                                                                                                                                                                                                                                                                                                                                                      |
| Manuscript ID                 | bmjopen-2018-028199                                                                                                                                                                                                                                                                                                                                                                                                                                                                                                                                                                                                                                                                                                                                  |
| Article Type:                 | Research                                                                                                                                                                                                                                                                                                                                                                                                                                                                                                                                                                                                                                                                                                                                             |
| Date Submitted by the Author: | 26-Nov-2018                                                                                                                                                                                                                                                                                                                                                                                                                                                                                                                                                                                                                                                                                                                                          |
| Complete List of Authors:     | Humphries, Claire; University of Birmingham, UK, Institute of Applied Health Research<br>Jaganathan, Suganthi ; Centre for Chronic Disease Control<br>Panniyammakal, Jeemon ; Centre for Chronic Disease Control<br>Singh, Sanjeev; Amrita Institute of Medical Sciences and Research Centre; Amrita Institute of Medical Sciences and Research Centre<br>Goenka, Shifalika; Public Health Foundation of India<br>Dorairaj, Prabhakaran ; Centre for Chronic Disease Control<br>Gill, Paramjit ; University of Warwick<br>Greenfield, Sheila; University of Birmingham, Primary Care Clinical Sciences<br>Lilford, Richard; University of Warwick, Division of Health and Population Sciences<br>Manaseki-Holland, Semira; University of Birmingham, |
| Keywords:                     | International health services < HEALTH SERVICES ADMINISTRATION & MANAGEMENT, Quality in health care < HEALTH SERVICES ADMINISTRATION & MANAGEMENT, PUBLIC HEALTH, QUALITATIVE RESEARCH                                                                                                                                                                                                                                                                                                                                                                                                                                                                                                                                                               |
|                               |                                                                                                                                                                                                                                                                                                                                                                                                                                                                                                                                                                                                                                                                                                                                                      |

SCHOLARONE™  
Manuscripts

1  
2  
3  
4 1 **Investigating inpatient and healthcare provider**  
5  
6  
7 2 **knowledge, attitudes and barriers to handover**  
8  
9  
10 3 **communication in India: A qualitative study**  
11  
12  
13  
14 4

15  
16  
17 5 Claire Humphries<sup>1¶</sup>, Suganthi Jaganathan<sup>2,3¶</sup>, Jeemon Panniyammakal<sup>2,3,4</sup>, Sanjeev Singh<sup>5</sup>,  
18 6 Shifalika Goenka<sup>2,3</sup>, Prabhakaran Dorairaj<sup>2,3</sup>, Paramjit Gill<sup>5</sup>, Sheila Greenfield<sup>1</sup>, Richard  
19 7 Lilford<sup>6</sup>, Semira Manaseki-Holland<sup>1\*</sup>  
20  
21  
22  
23

24 8  
25  
26 9 <sup>1</sup> Institute of Applied Health Research, University of Birmingham, Birmingham, West  
27 10 Midlands, United Kingdom

28  
29 11 <sup>2</sup> Public Health Foundation of India, New Delhi, Delhi, India

30 12 <sup>3</sup> Centre for Chronic Disease Control, New Delhi, Delhi, India

31 13 <sup>4</sup> Sree Chitra Tirunal Institute of Medical Sciences and Technology, Trivandrum, Kerala,  
32 14 India

33 15 <sup>5</sup> Hospital Administration, Amrita Institute of Medical Sciences, Kochi, Kerala, India

34 16 <sup>6</sup> Centre for Applied Health Research and Delivery, University of Warwick, Warwick,  
35 17 Warwickshire, United Kingdom

36 18  
37 19 \*Corresponding author

38 20 Email: S.ManasekiHolland@bham.ac.uk  
39 21  
40 22

41 23 <sup>¶</sup>These authors contributed equally to this work.  
42  
43  
44  
45  
46  
47  
48  
49  
50  
51  
52  
53  
54  
55  
56  
57  
58  
59  
60

26 Manuscript Word Count: 4993

## 27 ABSTRACT

28 **Objectives** 1. To investigate patient and healthcare provider knowledge (HCP), attitudes and  
29 barriers to handover communication during inpatient care. 2. To explore potential  
30 interventions for improving the storage and transfer of critical healthcare information.

31 **Methods** *Design:* Qualitative study comprising 41 semi-structured, individual interviews.  
32 Thematic analysis using the Framework Method with analyst triangulation. *Setting:* Three  
33 hospitals in Himachal Pradesh and Kerala, India. *Participants:* 20 male (n=10) and female  
34 (n=10) chronic NCD patients and 21 male (n=15) and female (n=6) HCPs. Purposive  
35 sampling was used to identify patients with chronic NCDs (Chronic Respiratory Disease,  
36 Cardiovascular Disease, Diabetes or Hypertension) and HCPs working in the study hospitals.

37 **Results** For chronic NCD patients, three themes emerged: (1) *Public healthcare service*  
38 *characteristics;* (2) *HCP-patient communication;* (3) *Attitudes regarding medical*  
39 *information.* For HCPs, three themes emerged: (1) *System factors;* (2) *Information exchange*  
40 *practices;* (3) *Quality improvement strategies.* Whilst some content within themes was  
41 unique to each participant group, there was substantial overlap. Both patients and HCPs  
42 recognised constraints affecting public healthcare; deficient primary care services placed  
43 increased pressure on hospitals, subsequently limiting HCP consultation times. HCP and IP  
44 reports also indicated an absence of structured referral formats, resulting in fragmented  
45 information transfer. Additionally, whilst patient-held documents were a key vehicle for  
46 information exchange between HCPs, not all patients transported them and HCPs stated that  
47 this hindered continuity of care. Inpatient descriptions of HCP communication indicated  
48 notable inconsistencies and a lack of patient-centeredness. HCPs reported systemic issues  
49 such as absence of formal handover communication systems and training.

1  
2  
3 50 **Conclusions** Handover communication for chronic NCD patients visiting public hospitals in  
4  
5 51 India is currently suboptimal. Structured information exchange systems are urgently required  
6  
7 52 to improve quality, continuity and safety of care. Our findings indicate that well-designed  
8  
9 53 patient-held record booklets may be an acceptable and effective part of the solution.  
10  
11  
12  
13  
14  
15  
16

## 17 56 **STRENGTHS AND LIMITATIONS OF THIS STUDY**

- 20 57 • This is the first qualitative study, as far as the authors are aware, to investigate  
21  
22 58 handover communication within and between levels of healthcare in India.
- 23 59 • The number of interviews conducted with both patients and healthcare providers  
24  
25 60 ensured data saturation and provided a variety of critical perspectives.
- 26 61 • Analyst triangulation corroborated data analysis and strengthened the credibility of  
27  
28 62 the study.
- 29 63 • Recruitment challenges meant that inpatients were predominantly older (i.e. 45yrs+),  
30  
31 64 therefore experiences of younger patients could not be thoroughly explored.
- 32 65 • Awareness of the interviewer's context as a public health researcher may have  
33  
34 66 resulted in participants distorting their responses to minimise critical judgement.  
35  
36  
37  
38  
39  
40  
41  
42  
43  
44  
45  
46  
47  
48  
49  
50  
51  
52  
53  
54  
55  
56  
57  
58  
59  
60

# 1. INTRODUCTION

The increasing burden of chronic, non-communicable diseases (NCDs) such as cardiovascular disease, diabetes and chronic respiratory disease has become a global pandemic that is disproportionately affecting low and middle-income countries (LMICs).<sup>1</sup> This is placing great demand on under-resourced health systems that can only be relieved by employing efficient and integrated approaches to healthcare management. Central to efficiency and integration in healthcare is effective handover communication, which involves the exchange of patient-specific information between healthcare providers (HCPs) and between HCPs and patients/carers.<sup>2</sup>

Between HCPs, information exchange is critical during clinical handovers, which are the points in care where information, responsibility and accountability for patient care are transferred from one HCP to another.<sup>3</sup> Such exchange is vital because safe and effective treatment can only be maintained if all relevant information has been shared and understood.<sup>4</sup> A wealth of research from high-income countries (HICs) has evidenced the association between communicative breakdowns during care transitions and significant risks to patient safety. These risks include delays in diagnosis, medication errors and life-threatening adverse events.<sup>5 6</sup> Additionally, effective information exchange between HCPs and patients is vital, as patients can provide valuable information to HCPs involved at various stages of their care pathway.<sup>4</sup> Excellent HCP-patient communication also empowers patients to become active participants in their healthcare management; this is a key aspect of patient-centred care, which has been linked to improved patient satisfaction and outcomes.<sup>7</sup>

Despite the established importance of handover communication for health systems functioning and patient safety, there is currently a dearth of LMIC-based research on this topic. Only a few studies from India have evaluated and described deficiencies in information

1  
2  
3 98 exchange during hospital shift-change and discharge.<sup>8-10</sup> The authors of this study have  
4  
5 99 completed a mixed-methods development project focussing on handover and continuity of  
6  
7  
8 100 care for chronic NCD patients in Kerala and Himachal Pradesh states, India. As we explored  
9  
10 101 the quality of handover communication for outpatients, we found that whilst all patients  
11  
12 102 received documented information during consultations, the contents of this varied  
13  
14  
15 103 substantially. Critically, many notes did not contain all items of information necessary for  
16  
17 104 facilitating continuity of care.<sup>11</sup> In addition, our quantitative study of handover during  
18  
19 105 hospital discharge has found significant associations between failure to receive key  
20  
21 106 healthcare information on discharge notes and an increased likelihood of adverse health  
22  
23  
24 107 outcomes (Humphries, Jaganathan, Panniyammakal, *et al.* 2018).

25  
26 108 The current study was conducted to gain further insight into the transfer of healthcare  
27  
28 109 information for chronic NCD inpatients in the same study areas of India. The primary  
29  
30  
31 110 objective was to explore knowledge, attitudes and barriers to handover communication during  
32  
33 111 the following points of care:

- 34  
35 112 • Referral/transfer (i.e. communication between HCPs and between HCPs and patients  
36  
37 113 when referring and/or transferring patients)  
38  
39  
40 114 • Hospital admission and discharge (i.e. communication between HCPs and patients  
41  
42 115 regarding condition, treatment and/or management during admission and discharge)  
43  
44

45 116 A secondary objective was to explore possible interventions to improve the storage and  
46  
47 117 transfer of critical healthcare information.  
48  
49

50 118

51  
52  
53 119

54  
55  
56  
57 120

58

59

60

## 121 **2. METHODS**

### 122 **2.1 Overview**

123 We report findings from a qualitative study of handover communication for chronic  
124 NCD inpatients in two Indian states. This study was conducted from December 2014 to  
125 November 2015 across three hospitals: one rural secondary-care hospital in Himachal  
126 Pradesh state, and one peri-urban secondary-care and one urban tertiary-care hospital in  
127 Kerala state. These settings were selected to capture a range of hospital types within different  
128 geographical settings. We selected public rather than private facilities as this is where a large  
129 proportion of vulnerable patients access healthcare. See supplementary files “S1” and “S2”  
130 for further information regarding the Indian healthcare system and study settings.

### 132 **2.2 Participant recruitment**

#### 133 **2.2.1 Inpatients**

134 Inpatients were recruited opportunistically from hospitals by trained research  
135 assistants (n=6).<sup>12</sup> Purposive sampling was used to identify individuals who met the  
136 following inclusion criteria: adults (18 years+),<sup>13</sup> admitted to hospital within 24 hours of a  
137 researcher first meeting them, due to complications from one of the following chronic NCDs:  
138 cardiovascular disease, chronic respiratory disease, diabetes mellitus, or hypertension. The  
139 identification process took place via researchers approaching ward nurses and asking them  
140 about patient demographic and admission details; patients were excluded if judged too unwell  
141 to participate by ward nurses. Patients who met the inclusion criteria were provided with  
142 verbal and documented study information. Written consent was obtained from literate  
143 patients. For illiterate patients, oral consent was obtained along with a thumbprint and



1  
2  
3 144 signature from a literate witness (i.e. family member/carer) in line with World Health  
4  
5 145 Organisation guidelines.<sup>14</sup> Inpatients were recruited until theoretical saturation was  
6  
7 146 achieved;<sup>15</sup> A total of 20 inpatients participated.  
8  
9  
10  
11 147

### 14 148 **2.2.2 Healthcare Professionals**

17 149 Healthcare professionals (HCPs) were recruited from study hospitals by trained  
18  
19 150 research assistants (n=6). Due to the busy nature of the study settings, opportunistic sampling  
20  
21 151 was used to recruit as many HCPs as possible with a range of roles and experience.<sup>12</sup> If HCPs  
22  
23 152 stated that they were too busy to answer questions they were deemed “unavailable” and not  
24  
25 153 included in the study. HCPs were also recruited until theoretical saturation was achieved;<sup>15</sup> A  
26  
27 154 total of 21 HCPs participated.  
28  
29  
30  
31  
32  
33

### 34 156 **2.3 Sample Size**

37  
38 157 As well as saturation being reached for both participant groups independently, the  
39  
40 158 resulting sample size of 41 participants for this study was in accordance with Baker and  
41  
42 159 Edwards’s review of sample sizes utilised in qualitative literature, indicating it was sufficient  
43  
44 160 for achieving overall data saturation.<sup>16</sup>  
45  
46  
47  
48 161

### 51 162 **2.4 Data collection**

54  
55 163 Interview data was collected entirely by the lead Indian researcher (SJ – an  
56  
57 164 experienced public health researcher), who was not local to the study areas. Full  
58  
59 165 consideration was given prior to and throughout data collection to ensure that SJ was aware  
60

1  
2  
3 166 of the potential limitations of working with participants from culturally and linguistically  
4  
5 167 diverse backgrounds. SJ was not involved in patient treatment or previously known to HCPs.  
6  
7  
8 168 Inpatient interviews took place either on hospital wards or at patients' homes (depending on  
9  
10 169 convenience); interviews at patients' homes took place five weeks after discharge. HCP  
11  
12 170 interviews took place in hospital offices. All interviews were conducted in either Hindi,  
13  
14 171 English, Malayalam or a mixture depending on interviewee preference and audio recorded  
15  
16 172 using a digital Dictaphone.

17  
18  
19  
20 173 Data collection took place in two stages. In the first stage (December 2014–October  
21  
22 174 2015), pre-prepared topic guides were used to guide interviews (see supplementary file “S3”).  
23  
24 175 Both inpatient and HCP guides included open-ended questions focussing on experiences and  
25  
26 176 attitudes of healthcare visits and information exchange. The HCP topic guide differed slightly  
27  
28 177 to capture information on health systems policy and practice; it also included questions  
29  
30 178 regarding handover training and potential interventions for improving practices. Following  
31  
32 179 this stage, on the 11<sup>th</sup> of October 2015, a handover expert's meeting took place in India to  
33  
34 180 present preliminary findings and discuss possible interventions.

35  
36  
37  
38  
39 181 Researchers from the University of Birmingham and University of Warwick (UK)  
40  
41 182 facilitated the presentation of results and group discussions at the meeting. Representatives  
42  
43 183 (n=27) from the following international, Indian national and state-level organisations  
44  
45 184 participated: The World Health Organisation; The World Bank; ACCESS Health  
46  
47 185 International; The Ministry of Health and Family Welfare; The Public Health Foundation of  
48  
49 186 India; The National Centre for Disease Control; The Centre for Chronic Disease Control; The  
50  
51 187 National Health System Resource Centre; The All India Institute of Medical Sciences; Aga  
52  
53 188 Khan Health Services; AMRITA Institute of Medical Sciences and Fortis Hospitals. During  
54  
55 189 discussions, a consensus was reached that patient-held record booklets were likely to be an  
56  
57 190 acceptable and sustainable intervention to improve information exchange. This was based on

1  
2  
3 191 the international success of similar patient-held records used in maternal healthcare around  
4  
5 192 the world.<sup>17-21</sup> It also took into account the delays in developing universal electronic  
6  
7  
8 193 information systems. Overall, it was opted as the most pragmatic intervention and numerous  
9  
10 194 experts felt that booklets could also improve patient self-management if they contained  
11  
12 195 disease-specific advice.

15 196 Therefore, following the meeting the second stage of qualitative data collection  
16  
17 197 (October–November 2015) commenced. Topic guides were updated to include questions  
18  
19 198 regarding the utility of patient-held booklets (see supplementary file “S4”). In addition, if  
20  
21 199 participants stated they had limited time then researchers interviewed them using a shortened  
22  
23 200 topic guide containing targeted questions on patient-held booklets (see supplementary file  
24  
25 201 “S4”).  
26  
27  
28  
29  
30 202

## 33 203 **2.5 Data Analysis**

36 204 All audio recordings of interviews were transcribed verbatim and, if necessary,  
37  
38 205 translated into English by SJ. All transcripts were then sent to the lead UK researcher (CH –  
39  
40 206 public health PhD student) for analysis. Data was analysed using the Framework Method,<sup>22</sup>  
41  
42 207 as this is the method most commonly used for semi-structured interview transcripts. Analysis  
43  
44 208 occurred through the following stages central to the Framework Method: transcription,  
45  
46 209 familiarisation, coding, charting, and interpretation. Over a one-month period, familiarisation  
47  
48 210 with the data took place via slow reading of transcripts and CH consulted with SJ to gain a  
49  
50 211 clear understanding of interview contexts. Once this was complete, coding began and two  
51  
52 212 transcripts were chosen at random from each batch of interviews (i.e. 2 inpatients and 2 HPC  
53  
54 213 transcripts) for independent coding by an additional analyst (SG – professor of medical  
55  
56 214 sociology) for analyst triangulation.<sup>23</sup> Inpatient and HCP transcripts were coded separately in

1  
2  
3 215 order to be able to assess similarities and differences between participant groups - Inpatient  
4  
5 216 transcripts were coded first. The coding process involved further familiarisation with the  
6  
7  
8 217 data, followed by open coding where certain transcript content was highlighted and allocated  
9  
10 218 descriptive labels (codes) to interpret the phenomena identified in the text. The development  
11  
12 219 of codes and themes was entirely data-led and analysed manually.<sup>24</sup>

15 220 Microsoft Excel was used to organise participant codes. CH created initial categories  
16  
17 221 by clustering similar codes developed from the two randomly selected inpatient and HCP  
18  
19 222 transcripts. CH and the additional analyst (SG) then met to discuss their analyses. As both  
20  
21 223 had produced similar codes and concepts, the categories that were created were mutually  
22  
23 224 agreed upon. CH then continued with category development until all transcripts had been  
24  
25 225 coded and inserted onto the spreadsheet. Following analysis of 20 inpatient and 26 HCP  
26  
27 226 transcripts, no new categories had been produced. This served as confirmation that data  
28  
29 227 saturation had been met.<sup>15</sup>

34 228 Following coding, categories were grouped into subcategories and linked to produce  
35  
36 229 themes. Then, via the process of charting,<sup>22 24</sup> themes for each participant group were used to  
37  
38 230 create a framework matrix into which participants' quotes were inserted, corresponding to  
39  
40 231 their representative subcategory. This provided a visual representation of themes, which  
41  
42 232 facilitated the mapping and interpretation of the data. After completing separate analysis of  
43  
44 233 patient and HCP data, results of both participant groups were compared to assess similarities  
45  
46 234 and differences between their reports of knowledge, attitudes and barriers to handover  
47  
48 235 communication. A Venn diagram was used to summarise the separate and overlapping  
49  
50 236 content, which was linked to sub-categories from original themes.

54  
55  
56 237

57  
58  
59 238

60

239

### 3. RESULTS

#### 3.1 Inpatient characteristics

20 male (n=10) and female (n=10) inpatients aged between 25 and 71 were interviewed.

Participants' background characteristics were varied (Table 1). Inpatients completed interviews in English (n=11), Hindi (n=4), Malayalam (n=4) and a mixture of Hindi and English (n=1).

Table 1. Inpatient characteristics

| Characteristics                                        | 1  | 2  | 3  | 4  | 5  | 6  | 7  | 8  | 9  | 10 | 11 | 12 | 13 | 14 | 15 | 16 | 17 | 18 | 19 | 20 | N (%)   |
|--------------------------------------------------------|----|----|----|----|----|----|----|----|----|----|----|----|----|----|----|----|----|----|----|----|---------|
| Age                                                    | 65 | 45 | 70 | 58 | 71 | 56 | 57 | 70 | 55 | 25 | 72 | 50 | 55 | 69 | 70 | 50 | 70 | 70 | 70 | 70 | 25-71   |
| <b>Sex</b>                                             |    |    |    |    |    |    |    |    |    |    |    |    |    |    |    |    |    |    |    |    |         |
| Male                                                   | ✓  | ✓  | ✓  | ✓  | ✓  |    |    |    | ✓  | ✓  | ✓  | ✓  |    |    |    | ✓  |    |    |    |    | 10 (50) |
| Female                                                 |    |    |    |    |    | ✓  | ✓  | ✓  |    |    |    |    | ✓  | ✓  | ✓  |    | ✓  | ✓  | ✓  | ✓  | 10 (50) |
| <b>Literacy</b>                                        |    |    |    |    |    |    |    |    |    |    |    |    |    |    |    |    |    |    |    |    |         |
| Illiterate                                             |    |    |    |    |    |    |    | ✓  |    |    |    |    | ✓  |    | ✓  | ✓  | ✓  | ✓  | ✓  | ✓  | 8 (40)  |
| Literate                                               | ✓  | ✓  | ✓  | ✓  | ✓  | ✓  | ✓  |    | ✓  | ✓  | ✓  | ✓  |    | ✓  |    |    |    |    |    |    | 12 (60) |
| <b>Education Level</b>                                 |    |    |    |    |    |    |    |    |    |    |    |    |    |    |    |    |    |    |    |    |         |
| None/minimal primary school-level                      |    |    |    |    |    |    |    | ✓  |    |    |    | ✓  | ✓  |    | ✓  | ✓  | ✓  | ✓  | ✓  | ✓  | 9 (45)  |
| Completed lower primary school                         |    |    |    |    | ✓  |    | ✓  |    |    |    |    |    |    |    |    |    |    |    |    |    | 2 (10)  |
| Completed upper primary school                         |    |    |    |    |    | ✓  |    |    |    |    |    |    |    |    |    |    |    |    |    |    | 1 (5)   |
| Completed secondary school                             |    |    |    |    |    |    |    |    | ✓  |    |    |    |    |    |    |    |    |    |    |    | 1 (5)   |
| Completed higher vocational studies                    |    |    |    |    |    |    |    |    |    |    |    |    |    |    |    |    |    |    |    |    | 0 (0)   |
| University graduate (or above)                         | ✓  |    |    | ✓  |    |    |    |    |    | ✓  | ✓  |    |    |    |    |    |    |    |    |    | 4 (20)  |
| No data                                                |    | ✓  | ✓  |    |    |    |    |    |    |    |    |    |    | ✓  |    |    |    |    |    |    | 3 (15)  |
| <b>Employment Status</b>                               |    |    |    |    |    |    |    |    |    |    |    |    |    |    |    |    |    |    |    |    |         |
| Employed                                               |    | ✓  |    | ✓  | ✓  |    |    |    | ✓  |    |    | ✓  | ✓  | ✓  |    | ✓  |    |    |    |    | 8 (40)  |
| Unemployed                                             |    |    |    |    |    | ✓  | ✓  | ✓  |    |    |    |    |    |    | ✓  |    | ✓  | ✓  | ✓  | ✓  | 8 (40)  |
| Student                                                |    |    |    |    |    |    |    |    |    | ✓  |    |    |    |    |    |    |    |    |    |    | 1 (5)   |
| Retired                                                | ✓  |    | ✓  |    |    |    |    |    |    |    | ✓  |    |    |    |    |    |    |    |    |    | 3 (15)  |
| <b>Chronic NCD(s) (related to admission)</b>           |    |    |    |    |    |    |    |    |    |    |    |    |    |    |    |    |    |    |    |    |         |
| Chronic Respiratory Disease                            |    |    | ✓  | ✓  |    | ✓  |    | ✓  |    |    |    |    | ✓  |    |    | ✓  |    |    |    |    | 6 (30)  |
| Diabetes                                               | ✓  |    |    |    |    |    |    |    |    |    |    |    |    | ✓  | ✓  | ✓  | ✓  | ✓  | ✓  | ✓  | 8 (40)  |
| Hypertension                                           |    |    |    |    |    |    |    |    | ✓  |    | ✓  | ✓  |    |    |    | ✓  | ✓  | ✓  |    |    | 6 (30)  |
| Cardiovascular Disease (other than Hypertension alone) | ✓  | ✓  |    |    | ✓  |    | ✓  | ✓  | ✓  | ✓  | ✓  | ✓  |    |    |    |    |    |    |    |    | 9 (45)  |
| <b>Language(s) used during Interview</b>               |    |    |    |    |    |    |    |    |    |    |    |    |    |    |    |    |    |    |    |    |         |
| English (only)                                         | ✓  | ✓  | ✓  | ✓  |    |    |    |    |    |    |    |    |    | ✓  | ✓  | ✓  | ✓  | ✓  | ✓  | ✓  | 11 (55) |
| Hindi (only)                                           |    |    |    |    |    | ✓  | ✓  | ✓  | ✓  |    |    |    |    |    |    |    |    |    |    |    | 4 (20)  |
| Malayalam (only)                                       |    |    |    |    |    |    |    |    |    | ✓  | ✓  | ✓  | ✓  |    |    |    |    |    |    |    | 4 (20)  |
| English & Hindi (mixture)                              |    |    |    |    | ✓  |    |    |    |    |    |    |    |    |    |    |    |    |    |    |    | 1 (5)   |

### 3.2 Healthcare Professional characteristics

21 male (n=15) and female (n=6) HCPs aged between 22 and 55 were interviewed. HCP roles included doctors (n=17), nurses (n=2), pharmacists (n=1) and medical records officers (n=1). HCP qualifications and experience were varied (Table 2). HCPs completed interviews in English (n=15), Hindi (n=2), Malayalam (n=2) and a mixture of Hindi and English (n=2).

For peer review only

Table 2. Healthcare professional characteristics

| Characteristics                          | 1  | 2  | 3  | 4  | 5  | 6  | 7  | 8  | 9  | 11 | 14 | 15 | 18 | 19 | 20 | 21 | 22 | 23 | 24 | 25 | 26 | N (%)     |          |
|------------------------------------------|----|----|----|----|----|----|----|----|----|----|----|----|----|----|----|----|----|----|----|----|----|-----------|----------|
| <b>Age</b>                               | 44 | 24 | 33 | 25 | 23 | 39 | 44 | 35 | 52 | 50 | 50 | 43 | 50 | 40 | 46 | 55 | 22 | 35 | 35 | 45 | 35 | 22-55     |          |
| <b>Sex</b>                               |    |    |    |    |    |    |    |    |    |    |    |    |    |    |    |    |    |    |    |    |    |           |          |
| Male                                     | ✓  |    | ✓  | ✓  | ✓  |    | ✓  |    | ✓  | ✓  | ✓  | ✓  | ✓  | ✓  | ✓  | ✓  | ✓  |    |    |    | ✓  | 15 (71.4) |          |
| Female                                   |    | ✓  |    |    |    | ✓  |    | ✓  |    |    |    |    |    |    |    |    |    | ✓  | ✓  |    | ✓  | 6 (28.6)  |          |
| <b>Qualification/s*</b>                  |    |    |    |    |    |    |    |    |    |    |    |    |    |    |    |    |    |    |    |    |    |           |          |
| MD                                       | ✓  |    | ✓  |    |    |    | ✓  | ✓  | ✓  | ✓  | ✓  | ✓  | ✓  | ✓  | ✓  | ✓  | ✓  |    |    |    |    | 13 (61.9) |          |
| MPH                                      |    |    |    |    |    | ✓  |    |    |    |    |    |    |    |    |    |    |    |    |    |    |    | 1 (4.8)   |          |
| MBBS                                     | ✓  | ✓  | ✓  | ✓  | ✓  | ✓  | ✓  | ✓  | ✓  | ✓  | ✓  | ✓  | ✓  | ✓  | ✓  | ✓  | ✓  |    |    |    |    | 17 (81.0) |          |
| BSc Nursing                              |    |    |    |    |    |    |    |    |    |    |    |    |    |    |    |    |    | ✓  |    |    | ✓  | 2 (9.5)   |          |
| BS Pharmacy                              |    |    |    |    |    |    |    |    |    |    |    |    |    |    |    |    |    |    | ✓  |    |    | 1 (4.8)   |          |
| Graduate (non-medical degree)            |    |    |    |    |    |    |    |    |    |    |    |    |    |    |    |    |    |    |    |    | ✓  | 1 (4.8)   |          |
| <b>Official position</b>                 |    |    |    |    |    |    |    |    |    |    |    |    |    |    |    |    |    |    |    |    |    |           |          |
| Medical Superintendent                   |    |    |    |    |    | ✓  |    |    |    |    |    |    |    |    |    |    |    |    |    |    |    | 1 (4.8)   |          |
| Chief Medical Officer                    |    |    |    |    |    |    |    |    | ✓  |    |    |    |    |    |    |    |    |    |    |    |    | 1 (4.8)   |          |
| Medical Officer                          |    |    |    |    |    |    |    |    |    |    |    |    | ✓  |    |    |    |    |    |    |    |    | 1 (4.8)   |          |
| Consultant                               | ✓  |    | ✓  |    |    |    | ✓  | ✓  |    |    |    |    | ✓  | ✓  | ✓  | ✓  | ✓  |    |    |    |    | 9 (42.9)  |          |
| Surgeon                                  |    | ✓  |    |    |    |    |    |    |    | ✓  |    |    |    |    |    |    |    |    |    |    |    | 2 (9.5)   |          |
| General Medicine                         |    |    |    |    |    |    |    |    |    |    | ✓  |    |    |    |    |    |    |    |    |    |    | 1 (4.8)   |          |
| Intern Doctor                            |    |    |    | ✓  | ✓  |    |    |    |    |    |    |    |    |    |    |    |    |    |    |    |    | 2 (9.5)   |          |
| Ward Nurse                               |    |    |    |    |    |    |    |    |    |    |    |    |    |    |    |    |    | ✓  |    |    | ✓  | 2 (9.5)   |          |
| Pharmacist                               |    |    |    |    |    |    |    |    |    |    |    |    |    |    |    |    |    |    |    | ✓  |    | 1 (4.8)   |          |
| Medical Records Officer                  |    |    |    |    |    |    |    |    |    |    |    |    |    |    |    |    |    |    |    |    | ✓  | 1 (4.8)   |          |
| <b>Years of experience in position</b>   |    |    |    |    |    |    |    |    |    |    |    |    |    |    |    |    |    |    |    |    |    |           |          |
| <1                                       |    | ✓  |    |    | ✓  |    |    |    |    |    |    |    |    |    |    |    |    |    |    |    |    | 2 (9.5)   |          |
| 1 – 3                                    |    |    |    | ✓  |    |    |    |    |    |    |    |    |    |    |    |    |    |    |    |    |    | 1 (4.8)   |          |
| 4 – 6                                    |    |    |    |    |    | ✓  |    | ✓  |    |    |    |    |    |    |    |    |    | ✓  |    | ✓  | ✓  | 5 (23.8)  |          |
| 7 – 10                                   |    |    | ✓  |    |    |    | ✓  |    |    |    |    |    |    |    |    |    |    |    |    | ✓  |    | 3 (14.3)  |          |
| >10                                      | ✓  |    |    |    |    |    |    |    | ✓  | ✓  | ✓  | ✓  | ✓  | ✓  | ✓  | ✓  | ✓  |    |    |    |    | 10 (47.6) |          |
| <b>Place of work</b>                     |    |    |    |    |    |    |    |    |    |    |    |    |    |    |    |    |    |    |    |    |    |           |          |
| General Hospital                         |    | ✓  | ✓  | ✓  | ✓  |    |    |    |    |    |    |    |    | ✓  |    | ✓  | ✓  | ✓  | ✓  |    |    | 9 (42.9)  |          |
| Regional Hospital                        | ✓  |    |    |    |    |    |    |    | ✓  | ✓  | ✓  |    | ✓  |    |    |    |    |    |    |    | ✓  | ✓         | 7 (33.3) |
| Taluk Hospital                           |    |    |    |    |    | ✓  | ✓  | ✓  |    |    |    | ✓  |    |    | ✓  |    |    |    |    |    |    | 5 (23.8)  |          |
| <b>Language(s) used during interview</b> |    |    |    |    |    |    |    |    |    |    |    |    |    |    |    |    |    |    |    |    |    |           |          |
| English (only)                           |    | ✓  | ✓  | ✓  | ✓  | ✓  | ✓  | ✓  | ✓  | ✓  | ✓  | ✓  |    | ✓  | ✓  | ✓  | ✓  |    |    |    |    | 15 (71.4) |          |
| Hindi (only)                             |    |    |    |    |    |    |    |    |    |    |    |    |    |    |    |    |    |    |    |    | ✓  | ✓         | 2 (9.5)  |
| Malayalam (only)                         |    |    |    |    |    |    |    |    |    |    |    |    |    |    |    |    |    | ✓  | ✓  |    |    | 2 (9.5)   |          |
| English & Hindi (mixture)                | ✓  |    |    |    |    |    |    |    |    |    |    | ✓  |    |    |    |    |    |    |    |    |    | 2 (9.5)   |          |



### 3.3 Charted Data

During analysis of patient and HCP data, three themes (with subcategories) emerged for each participant group. Patient themes were 1.Public healthcare service characteristics, 2.HCP to patient communication and 3.Attitudes regarding medical information (Table 3). HCP themes were 1.System factors, 2.Information exchange practices and 3.Quality improvement strategies (Table 4).

Following separate analysis of patient and HCP data, the results of both participant groups were compared to assess similarities and differences between their reports of knowledge, attitudes and barriers to handover communication. The results of this comparison are displayed in Figure 1 (see supplementary file “S5”).The similarities will be described first, followed by the differences. To ensure confidentiality, numerical pseudonyms have been used when presenting quotes.

**Table 3. Summary of charted data for inpatients (IPs)**

| IP | Public healthcare service characteristics |                                 | HCP to patient communication                     |                      |                         | Attitudes regarding medical information |                                   |                                       |
|----|-------------------------------------------|---------------------------------|--------------------------------------------------|----------------------|-------------------------|-----------------------------------------|-----------------------------------|---------------------------------------|
|    | Large patient loads (overcrowding)        | Deficient primary care services | Verbal healthcare information (during admission) | Referral information | Impoliteness/impatience | Transportation of medical documents     | Patient-held booklet intervention | Dissatisfaction with lifestyle advice |
| 1  |                                           |                                 |                                                  |                      |                         | ✓                                       |                                   |                                       |
| 2  |                                           |                                 | ✓                                                |                      |                         |                                         |                                   |                                       |
| 3  | ✓                                         |                                 | ✓                                                |                      | ✓                       | ✓                                       |                                   |                                       |
| 4  |                                           |                                 | ✓                                                |                      |                         | ✓                                       |                                   |                                       |
| 5  |                                           | ✓                               | ✓                                                | ✓                    | ✓                       |                                         |                                   |                                       |
| 6  |                                           |                                 |                                                  | ✓                    |                         | ✓                                       |                                   |                                       |
| 7  | ✓                                         | ✓                               |                                                  | ✓                    |                         | ✓                                       |                                   |                                       |
| 8  |                                           |                                 |                                                  | ✓                    |                         |                                         |                                   |                                       |
| 9  |                                           |                                 | ✓                                                |                      |                         |                                         |                                   |                                       |
| 10 |                                           |                                 | ✓                                                |                      |                         |                                         |                                   |                                       |
| 11 | ✓                                         |                                 | ✓                                                |                      |                         | ✓                                       |                                   |                                       |
| 12 |                                           |                                 | ✓                                                | ✓                    |                         | ✓                                       |                                   |                                       |
| 13 |                                           |                                 | ✓                                                |                      |                         | ✓                                       |                                   |                                       |
| 14 |                                           | ✓                               | ✓                                                |                      |                         |                                         | ✓                                 | ✓                                     |
| 15 |                                           | ✓                               | ✓                                                |                      | ✓                       |                                         | ✓                                 | ✓                                     |
| 16 |                                           | ✓                               | ✓                                                |                      |                         | ✓                                       | ✓                                 |                                       |
| 17 |                                           |                                 | ✓                                                |                      |                         | ✓                                       | ✓                                 | ✓                                     |
| 18 |                                           | ✓                               | ✓                                                |                      |                         | ✓                                       | ✓                                 |                                       |
| 19 |                                           |                                 | ✓                                                |                      |                         | ✓                                       | ✓                                 |                                       |
| 20 |                                           |                                 | ✓                                                |                      |                         |                                         | ✓                                 | ✓                                     |

Table 4. Summary of charted data for healthcare professionals (HCPs)

| HCP | System factors              |                                            | Information exchange practices                                      |                         |                    |                                |                        | Quality improvement strategies          |                             |                                   |                              |                                   |
|-----|-----------------------------|--------------------------------------------|---------------------------------------------------------------------|-------------------------|--------------------|--------------------------------|------------------------|-----------------------------------------|-----------------------------|-----------------------------------|------------------------------|-----------------------------------|
|     | Time & resource constraints | Absence of handover communication training | Absence of structured formats for information exchange between HCPs | Hospital record keeping | Ad-hoc phone calls | Patient-held medical documents | Discharge instructions | Hierarchical transfer of responsibility | Increase resource provision | Introduce formal referral systems | Implement "e-health" systems | Patient-held booklet intervention |
| 1   |                             |                                            | ✓                                                                   |                         |                    | ✓                              | ✓                      |                                         | ✓                           |                                   |                              |                                   |
| 2   |                             |                                            | ✓                                                                   |                         |                    | ✓                              | ✓                      |                                         |                             |                                   |                              |                                   |
| 3   |                             |                                            |                                                                     |                         |                    | ✓                              |                        |                                         | ✓                           | ✓                                 | ✓                            |                                   |
| 4   | ✓                           |                                            | ✓                                                                   |                         |                    | ✓                              | ✓                      |                                         |                             |                                   |                              |                                   |
| 5   |                             |                                            | ✓                                                                   | ✓                       |                    | ✓                              |                        |                                         |                             |                                   |                              |                                   |
| 6   | ✓                           |                                            | ✓                                                                   |                         |                    |                                |                        |                                         | ✓                           |                                   | ✓                            |                                   |
| 7   | ✓                           |                                            | ✓                                                                   |                         |                    |                                |                        | ✓                                       |                             |                                   |                              |                                   |
| 8   | ✓                           |                                            |                                                                     |                         |                    |                                |                        | ✓                                       |                             |                                   |                              |                                   |
| 9   |                             |                                            |                                                                     |                         |                    |                                |                        |                                         | ✓                           |                                   |                              |                                   |
| 11  | ✓                           | ✓                                          | ✓                                                                   |                         | ✓                  |                                | ✓                      |                                         |                             |                                   |                              |                                   |
| 14  | ✓                           | ✓                                          | ✓                                                                   |                         |                    |                                |                        |                                         | ✓                           | ✓                                 |                              |                                   |
| 15  |                             |                                            |                                                                     | ✓                       |                    | ✓                              |                        |                                         | ✓                           |                                   | ✓                            |                                   |
| 18  | ✓                           |                                            |                                                                     |                         |                    |                                |                        |                                         |                             |                                   | ✓                            | ✓                                 |
| 19  | ✓                           |                                            |                                                                     |                         |                    |                                |                        |                                         |                             |                                   |                              | ✓                                 |
| 20  | ✓                           |                                            |                                                                     |                         |                    | ✓                              |                        |                                         |                             |                                   |                              | ✓                                 |
| 21  |                             |                                            |                                                                     |                         |                    |                                |                        |                                         |                             |                                   |                              | ✓                                 |
| 22  | ✓                           |                                            |                                                                     |                         |                    |                                |                        | ✓                                       |                             |                                   |                              | ✓                                 |
| 23  |                             |                                            |                                                                     | ✓                       |                    | ✓                              | ✓                      | ✓                                       |                             |                                   |                              |                                   |
| 24  | ✓                           |                                            |                                                                     | ✓                       |                    |                                |                        |                                         |                             |                                   |                              |                                   |
| 25  |                             |                                            |                                                                     | ✓                       |                    |                                |                        |                                         |                             |                                   |                              |                                   |
| 26  | ✓                           |                                            |                                                                     |                         |                    |                                |                        | ✓                                       |                             |                                   |                              |                                   |

### 3.4 Overlapping content

#### 3.4.1 Public healthcare constraints

During interviews, a number of patients reported that they chose to visit public hospitals because of the better availability of healthcare staff compared to local healthcare facilities, such as smaller hospitals and primary/community health centres:

*“We have very limited time, we did go to local hospital but doctors are not there. So if we get time we will come here rather than going to a hospital where there are no doctors. (IP 15)”*

However, multiple patients also reported that government hospitals were often crowded with high daily patient loads:

*“There is so much crowd there you can’t ask or hear anything there... so many people are there now, you cannot do anything. (IP 11)”*

The human resource issues at government primary and community healthcare facilities were also mentioned by HCPs:

*“It will be useful if availability of doctors is ensured at the peripheral institutions around the clock. At times it is not there. (DOC 1)”*

Additionally, in our study settings most hospital doctors worked in both outpatient clinics and inpatient wards on a daily basis. Many doctors expressed concerns of time pressures due to the large patient volumes seen at hospital outpatient clinics and the subsequent lack of time they had to attend to all patients:

*“We can hardly spend five minutes with each patient, seeing the crowd you will just want to finish everyone soon. (DOC 7)”*

1  
2  
3 Some doctors also reported that human and medical resource constraints across public  
4  
5 healthcare facilities were hindering quality of care:  
6  
7

8 *“[It’s] not [about] motivation, [it’s about] resource limitation. It’s not humanly possible*  
9 *to see people every day for seven days. Quality definitely gets compromised. (DOC 3)”*  
10  
11  
12  
13  
14  
15

### 16 **3.4.2 Referral communication**

17  
18  
19  
20 A number of patients who recalled being referred from a previous healthcare facility to the  
21  
22 hospital reported that they were not provided with any referral information:  
23  
24

25 *“No, they didn’t give any parchhi [papers]. We were getting medicines right only that*  
26 *is with us. (IP 8)”*  
27  
28  
29

30 HCPs also discussed referral communication. Doctors explained that there were no structured  
31  
32 processes to follow for information exchange during referrals:  
33  
34

35 *“Yeah there is no proper way of doing it... inpatients sometimes we have to [refer]*  
36 *but as I told you we never had a structured format. (DOC 14)”*  
37  
38  
39

40  
41 However, despite a lack of structured systems, some doctors described making ad-hoc calls to  
42  
43 ensure that some information was transferred when referring a patient:  
44  
45

46 *“Sometimes I call the doctor to tell them that so and so is coming. Please do the*  
47 *needful. If I know the patient or doctor. (DOC 11)”*  
48  
49  
50  
51  
52  
53  
54  
55  
56  
57  
58  
59  
60

### 3.4.3 Patient-held medical information

At the point of hospital admission, patient-held notes and/or medical records can facilitate optimal care by providing HCPs with key patient-specific information. When asked about whether they brought medical papers to the hospital, most patients reported that they regularly stored and transported papers to HCP visits; these included referral notes, prescription cards, test results and other records from inpatient/outpatient/primary care:

*“Yeah we have always kept everything safely. [Shows researcher a bag with all sort of papers like reports, lab tests, etc.] (IP 3)”*

Doctors also talked about patient-held medical information during interviews. For example, some doctors reported that patients regularly kept and transported their medical records:

*“Almost everyone comes with medical reports. (DOC 11)”*

However, other doctors described that, in their experience, the availability of patient-held records was less consistent and that this could negatively impact continuity of care:

*“Some of them do bring investigations and all others don't bring much and we have to work out what happened from the start. (DOC 3)”*

### 3.4.4 Healthcare management communication

When asked about verbal HCP communication, many patients reported that during admission and/or discharge a HCP had provided them with some basic verbal healthcare management information (i.e. medication, treatment, lifestyle and/or follow-up requirements). However, the quantity of information received appeared to vary notably between patients. For example, some recalled being given detailed instructions:

1  
2  
3 *“Doctor says everything. I was given medicines and now they asked me to take*  
4 *injections also. Doctor is saying I am not controlling my sugar. The nurse taught me*  
5 *how to take injection. (IP 19)”*  
6  
7  
8  
9

10 Conversely, others appeared to receive relatively limited information and one carer reported  
11 having to seek healthcare advice from alternative sources:  
12

13  
14  
15  
16 *“Doctors don’t explain everything. We speak to our friends and get details from*  
17 *them. (Carer - IP 16)”*  
18  
19

20  
21 HCPs also discussed their healthcare communication practices with inpatients. Whilst talking  
22 about discharge, a nurse described the usual amount of time taken to explain information to  
23 each patient:  
24  
25  
26

27  
28  
29 *“Usually we take 20-25 minutes to instruct the patients. If the patients understand*  
30 *then it can be even faster. (NUR 1)”*  
31  
32

33  
34 Doctors reported that they provided patients with documented information on discharge cards  
35 and verbally advised inpatients to return to their local HCP/healthcare institution during the  
36 discharge consultation:  
37  
38  
39

40  
41 *“We give them a discharge card. Discharge card is there we have written and then we*  
42 *refer them to the local hospital or where they come from. (DOC 15)”*  
43  
44  
45  
46  
47  
48  
49  
50  
51  
52  
53  
54  
55  
56  
57  
58  
59  
60

### 3.4.5 Booklet intervention

During interviews that took place after the handover expert meeting, patients were asked for their opinion regarding the utility of a patient-held booklet where records could be stored and transported to HCP visits. Most appeared to think that it might be effective and could help with self-management, including those who were illiterate:

*“Yeah, sometimes we don’t know what to do so it would be good if some paper is there to help us. We can’t read it ourselves but our son or daughter-in-law can help us. (IP 17)”*

HCPs were also asked for their opinions regarding the booklet intervention. Many generally felt it could be useful, but various conditions and/or reservations were also expressed. For example, doctors felt that the success of the booklet would rely on patient attitudes:

*“That will depend on the patients, if they maintain that and bring it every time. For us there is no change, we write our observations in paper or notebook, doesn’t matter... Might be helpful. (DOC 22)”*

Related to this, one doctor felt that to see the most benefit, patients needed to be regularly instructed to keep and transport their medical documents:

*“We write the communication but the patients don’t keep them proper. I think we have to tell the patients to keep the letters and papers. (DOC 4)”*



## 3.5 Content unique to Inpatients

### 3.5.1 Attitudes regarding HCP communication during admission

A few patients recalled receiving some unfavourable/impolite treatment from healthcare staff during their hospital admission:

*“The doctor’s don’t speak much. They explain but get angry if you don’t understand them. (IP 3)”*

In addition, some patients expressed dissatisfaction with the lifestyle advice provided. In particular, patients of lower socio-economic status felt that nutritional instructions were not suitable for them due to their time and financial constraints:

*“We are daily labourers we can’t follow all the instructions... We can’t follow that, we are poor we do hard work and we just can’t concentrate on eating. Whatever is there we just eat. (IP 15)”*

## 3.6 Content unique to HCPs

### 3.6.1 Institutional/systemic factors

Despite displaying good knowledge of what information should be transferred during patient handovers, when asked about training opportunities numerous doctors mentioned that they had not received any formal handover training. Some recalled that this type of training was not provided at medical school:

*“I think it was not there in medical curriculum. (IP 1)”*

1  
2  
3 Others reported that training was not provided in their workplace/s and instead they learned  
4  
5 on the job:  
6  
7

8 *“We are sent to the wards, we see what our seniors do and we do that’s all. We have*  
9  
10 *to develop our communication skills ourselves no formal training is there. (DOC 14)”*  
11  
12

13  
14 When asked about hospital record keeping, a medical records officer stated that inpatient  
15  
16 records are stored in hospitals following patient discharge for up to ten years. However, the  
17  
18 same officer also indicated that these paper-based records are not easily accessible:  
19  
20

21 *“Definitely I can locate any record but it might take some time to locate them. (MRO*  
22  
23 *1)”*  
24  
25

### 26 27 28 29 **3.6.2 Organisational culture** 30 31

32  
33 Based on reports from both doctors and nurses, it appeared as though some hierarchical  
34  
35 transfer of responsibility for documented handover communication took place in hospitals.  
36

37 For example, a senior doctor mentioned that they instructed medical interns to write notes for  
38  
39 them when their patient load was high:  
40  
41

42 *“We do write in the papers, whether it’s discharge card or outpatient sheets. When*  
43  
44 *patient load is high, then we tell our interns to do it for us, we check that and then*  
45  
46 *sign. (DOC 22)”*  
47  
48  
49  
50  
51  
52  
53  
54  
55  
56  
57  
58  
59  
60

### 3.6.3 Requirements for improving information exchange

During interviews, HCPs were asked for their thoughts on intervention ideas to improve information exchange between HCPs and between HCPs and patients. Numerous doctors felt that there needed to be a notable increase in public healthcare resource provision:

*“Infrastructure is very small but the outpatient department is ten times more than it can manage, so more posts should be created... We have to increase the manpower and also our materials. (DOC 15)”*

In addition, doctors discussed the idea of introducing structured referral documents and systems to improve referral communication:

*“You can supply people with [referral] forms and make it mandatory that residents have to maintain a register. In that case they will maintain the register. (DOC 3)”*

Whilst discussing current information systems one doctor in Kerala reported that an application had been made for a near-future transition to computerised healthcare information systems. This appeared to be a state-wide plan for public healthcare facilities:

*“We have submitted a proposal for paperless computerisation system for doctors, so I think state-wide they are planning to do that. (DOC 6)”*

## 4. DISCUSSION

### 4.1 Main findings

This study presents qualitative data on inpatient and HCP knowledge, attitudes and barriers to handover communication in public hospitals in Kerala and Himachal Pradesh states, India.

Overall, the results show that verbal and documented information exchange between HCPs and between HCPs and patients is often suboptimal, with a lack of structured systems and HCP education in place to ensure sufficient continuity of care. Whilst three themes emerged for each participant group, comparison of the results showed that there was also a notable amount of overlapping content. These results have highlighted the multifaceted nature of handover communication within and between levels of healthcare in India. With regard to public health, the findings have also elucidated a number of key areas to address to improve the continuity and safety of chronic NCD patient care.

During interviews, both inpatients and HCPs recognised the resource constraints affecting public healthcare. The main issue reported was deficient primary healthcare services, which is in line with well-established findings of limited primary care infrastructure across India and numerous LMICs.<sup>25</sup> In our study settings, under-resourced primary care resulted in many patients preferring to visit hospitals. Subsequently, large patient loads were seen in outpatient and inpatient departments. Doctors reported that this limited their consultation times and ultimately affected the quality of information they could provide to patients. Notably varied patient recollections of healthcare information provided by HCPs during admission further evidenced the impact of time barriers on information exchange. The pressures reported here have also been identified in our previous outpatient research and may provide some explanation for the deficient provision of discharge information found in our quantitative inpatient study.<sup>11</sup> During interviews, senior doctors reported often being so busy

1  
2  
3 that they would pass the duty of writing discharge notes to interns or nurses. Additionally, it  
4  
5 seemed that more time was spent on verbal communication; one nurse reported taking  
6  
7 approximately twenty minutes per patient to explain discharge instructions. Such practices  
8  
9 may be compromising the retention of key healthcare information, as global literature  
10  
11 suggests that patients can struggle to absorb verbal details provided during consultations.<sup>26</sup>  
12  
13 The potential implications of this are significant, given the associations we have found  
14  
15 between failing to receive key documented discharge information and an increased likelihood  
16  
17 of adverse events (Humphries, Jaganathan, Panniyammakal, *et al.* 2018).  
18  
19  
20  
21

22 Another topic discussed by both participant groups was referral communication.  
23  
24 Reports revealed that that documented information was not always given to patients, and  
25  
26 when it was, it was often in the form of minimal, hand-written notes on papers provided for  
27  
28 other purposes (e.g. prescription cards). These findings reflect results from other LMIC  
29  
30 studies that have evidenced the exchange of poor-quality referral documents.<sup>27-29</sup> A small  
31  
32 number of doctors in our study reported calling HCPs to discuss a referral case, but this was  
33  
34 dependent on how well they knew the patient and/or HCP. These deficits are perhaps  
35  
36 unsurprising given that multiple HCPs reported that there was an absence of structured  
37  
38 systems and education provided for handover communication. These findings concur with the  
39  
40 few previous descriptions from India of an absence of training and protocols for handover  
41  
42 practices.<sup>8-10</sup>  
43  
44  
45  
46  
47

48 Another key area of discussion was the use of patient-held medical documents. Whilst  
49  
50 many inpatients reportedly transported records to HCP visits, doctors recalled seeing many  
51  
52 who did not bring information to hospital. This was problematic as if patients did not bring  
53  
54 their records then doctors had to gather details from scratch. It was also reported that  
55  
56 inpatient hospital records were not easily accessible and rarely retrieved. This lack of  
57  
58 available and accurate medical information carries notable risks for patient safety, as without  
59  
60

1  
2  
3 key background and/or treatment details, critical oversights can be made that result in adverse  
4 events.<sup>4 5 30</sup> When asked about the potential utility of introducing patient-held record  
5  
6 booklets, patients were generally positive and felt that the inclusion of self-management  
7  
8 information would be beneficial. Doctors had mixed views but generally thought that they  
9  
10 could be useful if patients had positive attitudes towards their maintenance and use. Given the  
11  
12 unstructured, paper-based systems utilised across the study sites, this is a promising area for  
13  
14 development. Patient-held records have been used successfully in maternity care throughout  
15  
16 the world and have improved referral networks as well as patient satisfaction and  
17  
18 knowledge.<sup>17-21</sup>

19  
20  
21  
22  
23  
24 Other issues affecting handover communication were mentioned within each  
25  
26 participant group. For inpatients, some recalled receiving impolite treatment from hospital  
27  
28 doctors during admission. Additionally, a small number of patients were dissatisfied with the  
29  
30 take-home nutritional advice provided, as they felt it failed to take into account their socio-  
31  
32 economic deprivation. These results may be explained by the reported lack of communication  
33  
34 training in medical education, as well as a historic tendency for paternalistic physician  
35  
36 conduct in India.<sup>31</sup> In other areas of India and Asia, research on HCP-patient communication  
37  
38 has also evidenced asymmetric power balances and patient dissatisfaction during both  
39  
40 inpatient and outpatient consultations.<sup>32</sup> Such findings reveal the need for more patient-  
41  
42 centred communication, particularly for the poorer patients that make up a significant  
43  
44 proportion of public healthcare users. As for HCPs, during interviews many doctors  
45  
46 recognised the need for an increase in public healthcare resource provision, as well as  
47  
48 structured systems for information exchange. Some also discussed the promise of  
49  
50 implementing “e-health” systems, with a doctor in Kerala reporting that public healthcare  
51  
52 facilities across the state will be transitioning to computerised systems. Whilst our colleagues  
53  
54 from Kerala report that this development is in its early stages, it has great potential as similar  
55  
56  
57  
58  
59  
60

1  
2  
3 systems have advanced the accessibility and quality of healthcare information across the  
4  
5 globe.<sup>33 34</sup>  
6  
7  
8  
9

## 10 **4.2 Strengths and limitations**

11  
12  
13

14 A key strength of this study is that, as far as the authors are aware, it is the first to  
15  
16 qualitatively report on handover communication with and between levels of care in India. The  
17  
18 use of multiple sites and qualitative methodology has revealed a number of key issues that are  
19  
20 supported among the HIC and emerging LMIC literature, suggesting likely transferability to  
21  
22 other LMIC settings. Additionally, interviews with both patients and HCPs have provided an  
23  
24 overview of handover communication from a multiple important perspectives. The number of  
25  
26 interviews conducted helped to ensure data saturation for both participant groups and study  
27  
28 credibility was strengthened via use of multi-analyst triangulation.<sup>23</sup>  
29  
30  
31  
32

33 With regard to limitations, recruitment challenges meant that patient participants were  
34  
35 predominantly older (i.e. 45yrs+). Therefore, experiences of younger patients could not be  
36  
37 thoroughly explored. In addition, the cross-cultural nature of this research may have resulted  
38  
39 in constraints during data collection and analysis; for example, the presence of in-group bias  
40  
41 could have affected participant's willingness to openly converse with a non-local  
42  
43 researcher.<sup>35</sup> Social desirability bias from the use of individual interviews and participant's  
44  
45 awareness that the interviewer was a public health professional may have also affected  
46  
47 truthfulness of the data.<sup>36</sup> However, the recurrence of themes indicating data saturation and  
48  
49 the finding that our results are supported by existing literature suggests this had minimal  
50  
51 impact.  
52  
53  
54  
55  
56  
57  
58  
59  
60

### 4.3 Conclusions and next steps

This study has found that handover communication for chronic NCD patients during care transitions and hospital admission is often fragmented. The critical barriers appear to be an absence of structured information exchange systems and HCP education. There is also a growing need for the government to strengthen the primary healthcare infrastructure in line with the declaration of Alma Alta.<sup>37</sup> This will greatly assist in increasing accessibility of care and reduce pressure on hospital services. It will also be required to address the United Nations sustainable development goals regarding universal health coverage and reducing premature deaths from NCDs.<sup>38</sup> In addition, the implementation of structured documentation, systems and training is urgently required to manage care transitions such as referral and discharge. Research from both HIC and LMIC settings has proven that such interventions can improve continuity and safety of care.<sup>4 10 27 39</sup>

During HCP interviews, it was reported that public healthcare facilities in Kerala will be transitioning to computerised “e-health” information systems. Whilst this development holds promise, issues regarding patient access to healthcare information and information exchange between public and private providers are likely to remain an issue. Therefore, with regard to research recommendations, a mixed-methods pilot study exploring the design and implementation of patient-held record booklets is suggested. This idea was welcomed by Indian national and international experts, as well as patients and HCPs in our study areas and could improve patient self-management as well as communication and integration between HCPs.

Finally, given the rising burden of NCDs across LMICs, this research is timely and crucial for effective health systems development. It is important that further LMIC research is conducted to explore critical factors affecting quality, continuity and safety of care and to develop sustainable and cost-effective interventions.



## ACKNOWLEDGEMENTS

This research was supported by the National Institute for Health Research (NIHR) Collaboration for Leadership in Applied Health Research and Care West Midlands (NIHR CLAHRC WM). We would like to extend our thanks to all patients, healthcare staff and researchers who kindly took the time to participate in this project. We are also indebted and give thanks to the participating hospitals and community healthcare facilities. Finally, we are very grateful to the Directors of Health from both Himachal Pradesh and Kerala States, India, for their assistance in facilitating this project. Without their support this research would not have been possible.

## AUTHOR CONTRIBUTIONS

In order of the authors list: CH: Data curation, formal analysis, visualisation, writing (both original draft and final review and editing). SJ: Investigation, data curation, project administration, writing (review and editing). JP: Conceptualisation, funding acquisition, project administration, supervision, writing (review and editing). SS: Funding acquisition, project administration, supervision, writing (review and editing). SG(oenka): Funding acquisition, project administration, supervision, writing (review and editing). PD: Conceptualisation, funding acquisition, project administration, supervision, writing (review and editing). PG: Conceptualisation, data curation, funding acquisition, writing (review and editing). SG(reenfield): Funding acquisition, formal analysis, writing (review and editing). RL: Conceptualisation, funding acquisition, writing (review and editing). SMH:

1  
2  
3 Conceptualisation, funding acquisition, investigation, methodology, project administration,  
4  
5 supervision, writing (review and editing).  
6  
7  
8  
9

## 10 11 **FUNDING STATEMENT** 12 13

14  
15 This research was joint-funded by the Department of International Development, the  
16  
17 Economic and Social Research Council, the Medical Research Council and the Wellcome  
18  
19 Trust - grant number: MR/M00287X/1. The funders had no role in study design, conduct or  
20  
21 reporting.  
22  
23  
24  
25  
26  
27

## 28 29 **COMPETING INTERESTS STATEMENT** 30 31

32 The authors of this manuscript have no competing interests to disclose.  
33  
34  
35  
36  
37  
38  
39

## 40 41 **ETHICS APPROVAL** 42 43

44 This study was reviewed and approved by the Centre for Chronic Disease Control  
45  
46 Independent Ethics Committee, India, and the Amrita Institute of Medical Sciences  
47  
48 Institutional Ethics Committee, India. Data archives will be stored at the University of  
49  
50 Birmingham, in accordance with the University's code of practice.  
51  
52  
53  
54  
55  
56  
57  
58  
59  
60

1  
2  
3 **DATA SHARING STATEMENT**  
4  
5

6  
7 No additional data are available.  
8  
9

10  
11  
12  
13  
14  
15  
16  
17  
18  
19  
20  
21  
22  
23  
24  
25  
26  
27  
28  
29  
30  
31  
32  
33  
34  
35  
36  
37  
38  
39  
40  
41  
42  
43  
44  
45  
46  
47  
48  
49  
50  
51  
52  
53  
54  
55  
56  
57  
58  
59  
60

For peer review only

## REFERENCES

1. Islam SMS, Purnat TD, Phuong NTA, et al. Non-Communicable Diseases (NCDs) in developing countries: a symposium report. *Globalization and health* 2014;10(1):81.
2. World Health Organisation. Communication during patient hand-overs. *Patient safety solutions* 2007;1(3):1-4.
3. British Medical Association. Safe handover: safe patients. *Guidance on clinical handover for clinicians and managers London: BMA* 2004;7:141.
4. Merten H, van Galen LS, Wagner C. Safe handover. *Bmj* 2017;359:j4328. doi: <https://dx.doi.org/10.1136/bmj.j4328>
5. Safety ACf, Care QiH. Clinical handover and patient safety: Literature review report. 2005
6. Hesselink G, Schoonhoven L, Barach P, et al. Improving patient handovers from hospital to primary care: a systematic review. *Ann Intern Med* 2012;157(6):417-28. doi: <https://dx.doi.org/10.7326/0003-4819-157-6-201209180-00006>
7. Bradley S, Mott S. Adopting a patient-centred approach: an investigation into the introduction of bedside handover to three rural hospitals. *J Clin Nurs* 2014;23(13-14):1927-36. doi: <https://dx.doi.org/10.1111/jocn.12403>
8. Kumar PJ, V.; Vij, A.; Gupta, S K. . Who is more hands on with hand-offs? A comparative study of clinical handovers among doctors and nurses in a tertiary care center in India. *International Journal of Research Foundation of Hospital & Healthcare Administration* 2015;3(1):33-40.
9. Kumar P, Jithesh V, Vij A, et al. Need for a hands-on approach to hand-offs: A study of nursing handovers in an Indian Neurosciences Center. *Asian journal of neurosurgery* 2016;11(1):54.
10. Rajavelu P, Rajagopalan A. Pre-formatted written discharge summary—a step towards quality assurance in the emergency department. *International journal of emergency medicine* 2008;1(4):321-25.
11. Humphries C, Jaganathan S, Panniyammakal J, et al. Investigating clinical handover and healthcare communication for outpatients with chronic disease in India: A mixed-methods study. *PLoS One* Forthcoming
12. Marshall MN. Sampling for qualitative research. *Fam Pract* 1996;13(6):522-26.
13. Palys T. Purposive Sampling. In: Given LM, ed. *The Sage Encyclopedia of Qualitative Research Methods*. Los Angeles: Sage 2008:697-98.
14. World Health Organisation. Information for Researchers Concerning Informed Decision Making [Internet ]. Available from: [http://www.who.int/rpc/research\\_ethics/Process\\_seeking\\_IF\\_printing2.pdf](http://www.who.int/rpc/research_ethics/Process_seeking_IF_printing2.pdf) accessed 01/05/18.
15. Seale C. Quality in qualitative research. *Qualitative inquiry* 1999;5(4):465-78.
16. Baker SE, Edwards R, Doidge M. How many qualitative interviews is enough?: Expert voices and early career reflections on sampling and cases in qualitative research. 2012
17. Shah PM, Selwyn BJ, Shah K, et al. Evaluation of the home-based maternal record: a WHO collaborative study. *Bull World Health Organ* 1993;71(5):535-48.
18. Osaki K, Hattori T, Kosen S. The role of home-based records in the establishment of a continuum of care for mothers, newborns, and children in Indonesia. *Glob Health Action* 2013;6:1-12. doi: <https://dx.doi.org/10.3402/gha.v6i0.20429>
19. Turner KE, Fuller S. Patient-held maternal and/or child health records: meeting the information needs of patients and healthcare providers in developing countries? *Online journal of public health informatics* 2011;3(2)
20. Takeuchi J, Sakagami Y, Perez RC. The Mother and Child Health handbook in Japan as a health promotion tool: An overview of its history, contents, use, benefits, and global influence. *Global pediatric health* 2016;3:2333794X16649884.

- 1
- 2
- 3
- 4 21. Walton S, Bedford H, Dezateux C. Use of personal child health records in the UK: findings from
- 5 the millennium cohort study. *Bmj* 2006;332(7536):269-70.
- 6
- 7 22. Spencer L, Ritchie J. Qualitative data analysis for applied policy research. Analyzing qualitative
- 8 data: Routledge 2002:187-208.
- 9
- 10 23. Lincoln YS, Guba EG. Naturalistic inquiry. Beverley Hills: ca: sage, 1985.
- 11
- 12 24. Gale NK, Heath G, Cameron E, et al. Using the framework method for the analysis of qualitative
- 13 data in multi-disciplinary health research. *BMC medical research methodology*
- 14 2013;13(1):117.
- 15
- 16 25. Das J, Hammer J. Quality of primary care in low-income countries: facts and economics. *Annu Rev*
- 17 *Econ* 2014;6(1):525-53.
- 18
- 19 26. Kessels RP. Patients' memory for medical information. *Journal of the Royal Society of Medicine*
- 20 2003;96(5):219-22.
- 21
- 22 27. Janati A, Amini A, Adham D, et al. Assessing the quality of referral letters written by general
- 23 practitioners: a cross-sectional study in rural Iran. *Cadernos de Saude Publica*
- 24 2017;33(2):e00043016.
- 25
- 26 28. Gyedu A, Baah EG, Boakye G, et al. Quality of referrals for elective surgery at a tertiary care
- 27 hospital in a developing country: an opportunity for improving timely access to and cost-
- 28 effectiveness of surgical care. *Int J Surg* 2015;15:74-8. doi:
- 29 <https://dx.doi.org/10.1016/j.ijsu.2015.01.033>
- 30
- 31 29. Osinaike BO, Esezobor CI, Akinsola OJ. Quality of Referral Letters to the Paediatric Department of
- 32 a Tertiary Hospital in Nigeria. *Nigerian Quarterly Journal of Hospital Medicine*
- 33 2013;23(4):273-9.
- 34
- 35 30. Forster AJ, Murff HJ, Peterson JF, et al. The incidence and severity of adverse events affecting
- 36 patients after discharge from the hospital. *Ann Intern Med* 2003;138(3):161-7.
- 37
- 38 31. Ghooi R, Deshpande S. Patients' rights in India: an ethical perspective. *Indian J Med Ethics*
- 39 2012;9(277):e8.
- 40
- 41 32. Pun J, Chan EA, Wang S, et al. Health professional-patient communication practices in East Asia:
- 42 An integrative review of an emerging field of research and practice in Hong Kong, South
- 43 Korea, Japan, Taiwan, and Mainland China. *Patient education and counseling* 2018
- 44
- 45 33. Piette JD, Lun KC, Moura LA, Jr., et al. Impacts of e-health on the outcomes of care in low- and
- 46 middle-income countries: where do we go from here? *Bull World Health Organ*
- 47 2012;90(5):365-72. doi: <https://dx.doi.org/10.2471/BLT.11.099069>
- 48
- 49 34. Campanella P, Lovato E, Marone C, et al. The impact of electronic health records on healthcare
- 50 quality: a systematic review and meta-analysis. *Eur J Public Health* 2016;26(1):60-4. doi:
- 51 <https://dx.doi.org/10.1093/eurpub/ckv122>
- 52
- 53 35. Tajfel H. Social psychology of intergroup relations. *Annual review of psychology* 1982;33(1):1-39.
- 54
- 55 36. Spector P. Social desirability bias. *Encyclopedia of social science research methods* 2004:1045-46.
- 56
- 57 37. Organization WH. Declaration of Alma-Ata: International Conference on Primary Health Care,
- 58 Alma-Ata, USSR, 6–12 September 1978. Retrieved February 1978;14:2006.
- 59
- 60 38. United Nations. Sustainable Development Goals. [Internet]. Available from:
- <https://www.un.org/sustainabledevelopment/sustainable-development-goals/2018>.
39. Ramanayake R. Structured printed referral letter (form letter); saves time and improves
- communication. *Journal of family medicine and primary care* 2013;2(2):145.

# S1. Additional information regarding the Indian healthcare system

## 1. National context: structure of public healthcare system

The basic structure of the public healthcare system in India is as follows:<sup>1</sup>

- National level: Ministry of Health and Family Welfare.
- State level: State Department of Health and Family welfare in each state.
- Regional level: covers 3 - 5 districts. Headed by State Directorate of Health.
- District level: Middle level management organisation serving as a link between the regional and state structures and the peripheral and PHC structures.
- Sub-divisional/Taluk level: Hospitals/hospitals with specialty care (Taluk headquarters hospitals). Healthcare services are rendered via the office of Assistant District Health and Family Welfare Officer.
- Community level: CHCs that cater for 80,000-120,000 population and PHCs that cover approximately 20,000 – 30,000 population (often upgrades of rural dispensaries).

## 2. Public healthcare across India

The quality of public healthcare across India varies notably between states and between urban and rural areas. Aside from some pockets of excellence in a select few states, the public sector is generally falling short of meeting the basic healthcare needs of the growing population. Some of the main reasons for this include: services being too far away, a lack of trained personnel and supplies, and limited facility opening times that are often unreliable.<sup>2</sup>

With regard to primary health centres, government estimates indicate that 10% are without a

1  
2  
3 doctor, 37% are without a laboratory technician and 25% are without a pharmacist.<sup>3</sup> Issues  
4 with public health centres are particularly rife within poor communities, where facilities have  
5 been found to be closed more than half the time and lack basic medical supplies. Public  
6 facilities are the often the only source of qualified healthcare professionals in rural areas,  
7 which is where much of the poor live.<sup>2</sup>  
8  
9  
10  
11  
12  
13  
14  
15  
16  
17

### 18 **3. National context: private healthcare**

19  
20 Public healthcare in India has lacked funding over a series of decades, resulting from a lack  
21 of prioritisation from economic planners. Therefore, the increasing prevalence of chronic,  
22 non-communicable diseases alongside unresolved challenges of infectious diseases has  
23 placed more strain on public health systems than what can feasibly be managed. The private  
24 healthcare sector has subsequently proliferated to meet rising needs, expectations and  
25 incomes and surveys indicate that private healthcare providers now dominate service  
26 provision. According to reports, public facilities provided just 20% of primary and  
27 community-level healthcare services, and 40% of hospital visits in 2004-05 (down from 25%  
28 and 60% respectively in 1986-87).<sup>2</sup> At the higher end of the market the private sector has  
29 world class facilities that have grown substantially. As a result, hospital care is now an export  
30 sector for medical tourism that cares for approximately 200,000 foreign patients per year.<sup>4</sup>  
31 However, private healthcare providers are poorly regulated, with uneven quality across  
32 facilities. This is resulting in a large number of private facilities delivering services without  
33 appropriate equipment or expertise. Additionally, although visiting private providers is  
34 preferential for many, it is common for high out-of-pocket costs to be incurred; more than  
35 40% of all private hospital inpatients have to borrow money or sell assets in order to fund  
36 their care.<sup>5</sup> This means that many poorer patients are unable to access healthcare while others  
37 fall into poverty as a result of spending.  
38  
39  
40  
41  
42  
43  
44  
45  
46  
47  
48  
49  
50  
51  
52  
53  
54  
55  
56  
57  
58  
59  
60

## REFERENCES

1. Care Continuum Alliance, India. India – Health Care System Structure and Organization. 2009. Available from: <http://dmaa.pbworks.com/w/page/17960772/India%20-%20Health%20Care%20System%20Structure%20and%20Organization>
2. Joumard I, Kumar A. Improving health outcomes and health care in India. Paris: Organisation for Economic Cooperation and Development (OECD) Working Papers, No. 1184, OECD Publishing. 2015. Available from: [http://www.oecd-ilibrary.org/economics/improving-health-outcomes-and-health-care-in-india\\_5js7t9ptcr26-en](http://www.oecd-ilibrary.org/economics/improving-health-outcomes-and-health-care-in-india_5js7t9ptcr26-en)
3. Ministry of Health and Family Welfare, Government of India. Rural Health Statistics in India. 2012. Available from: [https://nrhm.gujarat.gov.in/images/pdf/publications/RHS\\_2012.pdf](https://nrhm.gujarat.gov.in/images/pdf/publications/RHS_2012.pdf)
4. Lunt N, Smith R, Exworthy M, Green S, Horsfall D, Mannion R. Medical Tourism: Treatments, Markets and Health System Implications: a Scoping Review. OECD Publishing. 2010. Available from: Paris <http://www.oecd.org/els/health-systems/48723982.pdf>
5. The World Bank - Health, Nutrition, Population Sector Unit India South Asian Region. Raising the sights: better health systems for India's poor. Available from: <https://openknowledge.worldbank.org/handle/10986/14080>



## **S2. S1. Additional information regarding the study settings**

### **2.1.1. Study setting - Himachal Pradesh**

Himachal Pradesh is principally a rural state in northern India. It has a population of 6.86 million people and the average literacy rate is 83.3%, which is higher than the national average (74%). However, rates remain notably lower for women compared to men (76.6% vs. 90.8%, respectively).<sup>6</sup> Private HCPs are less prevalent in Himachal Pradesh and public healthcare utilisation remains relatively high.<sup>7</sup> A recent study found that the availability of public health services in the state was deemed adequate as compared to standards of other hill states, but with an unequal distribution of resources across regions.<sup>8</sup>

### **2.1.2 Study setting - Kerala**

Kerala state is in the south-west of India. It has a population of 34.8 million people and a greater than national average urban-based population of 47.7%. It has the highest overall literacy rate in India (93.9%; men 96.1%, women 92.1).<sup>9</sup> There are a relatively large number of government healthcare facilities in Kerala but the healthcare environment is becoming increasingly complex due to a growing presence of private healthcare providers. Despite this, public health facilities in Kerala are generally the first point of care and continue to deliver essential services.<sup>10</sup>

## REFERENCES

6. Government of India. Himachal Pradesh Population Census Data 2011 [Internet]. Available from: <https://www.census2011.co.in/census/state/himachal+pradesh.html> accessed 13/06/18 2017.
7. Government of India. Himachal Pradesh Development Report. New Delhi: Academic Foundation, 2005.
8. Suman.; Bhutani S. Availability of health services in Himachal Pradesh *International Journal of Advanced Research and Development* 2017;2(6):231-38.
9. Government of Kerala. Kerala Population Census Data 2011 [Internet]. Available from: <https://www.census2011.co.in/census/state/kerala.html> accessed 13/06/18.
10. Government of Kerala. Kerala Development Report. New Delhi: Academic Foundation, 2008.

### S3. Qualitative interview topic guides (Dec 2014 – Oct 2015)

#### Interview topic guide for healthcare providers in the hospital (and community providers – reverse the order of asking section A and B)

Please explain your experience or observations in the circumstances below with patients with cardiovascular conditions, diabetes, chronic chest disease or other chronic conditions in your place of work:

#### **A - Primary to secondary care:**

1. In your experience, how frequently do patients bring notes from primary care when they come to the hospital? What type of note is it? (Forms, letters, prescription etc.)
2. Usually what type of information does it contain? (medication, past history, tests, etc.)
3. In what way is this referral information helpful/could be helpful, and how could it be improved? What do you think are the most important details to include in the referral information?
4. In the absence of patient records or referral notes, how do you decide what the patient has been taking medically?
5. How would you improve this situation – guide us on the problems and things that would help?
6. If these problems are sorted, how do you think we can encourage community and primary care doctors to send the information when they refer a patient? (i.e. motivators)

#### **B - Secondary to Primary care:**

7. If you or your colleagues have a system of sending information about the patient to the primary care providers (even if you do not know who this may be), what form does this information take?
8. In your opinion, what way is the information you send to primary care doctors helpful for the care of the patient, and how could these communications be improved?
9. When seeing patients at outpatient clinics, given the fact that the patients may not come back, what do you do to ensure they continue their correct treatment?
10. How would you improve this situation – guide us on the problems and things that would help?

1  
2  
3 **Interview topic guide for healthcare providers (continued)**  
4  
5

- 6 11. If these problems are sorted, how do you think we can encourage hospital doctors to  
7 send the information when they refer a patient? (motivators)  
8  
9  
10

11  
12 **C - Training:**  
13

- 14 12. As far as you recall, as an undergraduate or while working, have you had any structured  
15 training for hospital shifts or for transfer for information at shift times in hospital  
16 practice? If so, what were you trained to do?  
17  
18 13. As far as you recall, as an undergraduate or while working, have you had any structured  
19 training for writing referral notes when referring patients to hospitals or for writing  
20 handover notes for primary care doctors to pass on patient's clinical information to them?  
21 If so, what where you trained to do?  
22  
23  
24  
25  
26

27 **D - Health care provider information to be collected:**  
28

- 29 • Speciality  
30 • Years of relevant experience  
31 • Place of work  
32 • Designation  
33  
34  
35  
36  
37  
38  
39  
40  
41  
42  
43

44 **Interview topic guide for patients and carers**  
45

46 Please explain your experience or observations in the below circumstances with health care  
47 providers in your town in small clinics near you or at hospitals:

48 **A - Primary to secondary care:**  
49

- 50 1. Is there any way that your treating community doctor tells the hospital about your  
51 condition when they refer you there?  
52  
53 2. Do you think this is important and why? (please explore if they think it is or is not  
54 important)  
55  
56 3. How do you share information with the hospital doctor about your previous medical  
57 treatments and conditions (in other hospitals or when seeing your local doctors)?  
58  
59  
60

1  
2  
3 **Interview topic guide for patient and carer (continued)**  
4  
5  
6

7 **B - Secondary to primary care:**  
8

- 9  
10 a. How does your local treating doctor/close to your house, get to know about what was  
11 done in hospital when you were seen at the outpatient clinic and/or admitted?  
12  
13 b. Do you think this is important and why?  
14  
15 c. What do you do with your medical papers when you get home after being seen at the  
16 outpatient clinic?  
17  
18  
19  
20  
21

22 **C - Secondary care to patient:**  
23

- 24 d. What advice/instructions are you given when you see the doctor at the outpatient  
25 clinic?  
26  
27 e. After you leave hospital, how do you know what to do to take best care of yourself  
28 (for the months ahead)?  
29  
30  
31  
32  
33

34 **D - Participant information to be collected:**  
35

- 36  
37 • Age  
38 • Gender  
39 • Religion  
40 • Highest level of education  
41 • Condition(s)  
42 • Years of having this conditions  
43 • Place village and district  
44  
45  
46  
47  
48  
49  
50  
51  
52  
53  
54  
55  
56  
57  
58  
59  
60

## S4. Qualitative interview topic guides (Oct 2015 – Dec 2015)

### Interview topic guide for healthcare providers in the hospital (and community providers – reverse the order of asking section A and B)

*Note to Researchers: if a healthcare provider states they have limited time to be interviewed, please use the shortened topic guide below.*

Please explain your experience or observations in the circumstances below with patients with cardiovascular conditions, diabetes, chronic chest disease or other chronic conditions in your place of work:

#### **A - Primary to secondary care:**

14. In your experience, how frequently do patients bring notes from primary care when they come to the hospital? What type of note is it? (Forms, letters, prescription etc.)
15. Usually what type of information does it contain? (medication, past history, tests, etc.)
16. In what way is this referral information helpful/could be helpful, and how could it be improved? What do you think are the most important details to include in the referral information?
17. In the absence of patient records or referral notes, how do you decide what the patient has been taking medically?
18. How would you improve this situation – guide us on the problems and things that would help? Do you think patient-held booklets for storing and transporting medical records would be useful?
19. If these problems are sorted, how do you think we can encourage community and primary care doctors to send the information when they refer a patient? (i.e. motivators)

#### **B - Secondary to Primary care:**

20. If you or your colleagues have a system of sending information about the patient to the primary care providers (even if you do not know who this may be), what form does this information take?
21. In your opinion, what way is the information you send to primary care doctors helpful for the care of the patient, and how could these communications be improved?

1  
2  
3 **Interview topic guide for healthcare providers (continued)**  
4

- 5  
6 22. When seeing patients at outpatient clinics, given the fact that the patients may not  
7 come back, what do you do to ensure they continue their correct treatment?  
8  
9 23. How would you improve this situation – guide us on the problems and things that  
10 would help? Do you think patient-held booklets for storing and transporting medical  
11 records would be useful?  
12  
13  
14 24. If these problems are sorted, how do you think we can encourage hospital doctors to  
15 send the information when they refer a patient? (motivators)  
16  
17

18 **C - Training:**  
19

- 20 25. As far as you recall, as an undergraduate or while working, have you had any structured  
21 training for hospital shifts or for transfer for information at shift times in hospital  
22 practice? If so, what were you trained to do?  
23  
24 26. As far as you recall, as an undergraduate or while working, have you had any structured  
25 training for writing referral notes when referring patients to hospitals or for writing  
26 handover notes for primary care doctors to pass on patient's clinical information to them?  
27 If so, what where you trained to do?  
28  
29  
30  
31  
32

33 **D - Health care provider information to be collected:**  
34

- 35 • Speciality  
36 • Years of relevant experience  
37 • Place of work  
38 • Designation  
39  
40  
41  
42

43 **Shortened interview topic guide for healthcare providers**  
44

- 45 1. Would you prefer it if patients came to consultations with all their previous medical  
46 records?  
47  
48 2. Will having previous records of patients in a booklet format help with clinical  
49 management?  
50  
51  
52 3. Do you think that introducing patient-held booklets for recording key information  
53 (e.g. blood pressure, sugar levels etc.) would help clinical management?  
54  
55 4. Would you like to write in patient-held booklets about patients' clinical management?  
56  
57  
58 5. Please share your views on how to improve the clinical management of chronic non-  
59 communicable disease patients  
60

1  
2  
3  
4 **Shortened interview topic guide for healthcare providers (continued)**  
5  
6  
7

8 **Health care provider information to be collected:**

- 9
- 10 • Speciality
  - 11 • Years of relevant experience
  - 12 • Place of work
  - 13 • Designation
- 14  
15  
16  
17  
18  
19  
20

21 **Interview topic guide for patients and carers**

22  
23 *Note to Researchers: if a patient states they have limited time to be interviewed, please use*  
24 *the shortened topic guide below.*  
25  
26  
27

28 Please explain your experience or observations in the below circumstances with health care  
29 providers in your town in small clinics near you or at hospitals:  
30

31 **A - Primary to secondary care:**

- 32
- 33 4. Is there any way that your treating community doctor tells the hospital about your  
34 condition when they refer you there?
  - 35 5. Do you think this is important and why? (please explore if they think it is or is not  
36 important)
  - 37 6. How do you share information with the hospital doctor about your previous medical  
38 treatments and conditions (in other hospitals or when seeing your local doctors)?  
39  
40  
41  
42  
43  
44  
45  
46  
47

48 **B - Secondary to primary care:**

- 49
- 50 a. How does your local treating doctor/close to your house, get to know about what was  
51 done in hospital when you were admitted?
  - 52 b. Do you think this is important and why?
  - 53 c. What do you do with your medical papers when you get home after being seen at the  
54 hospital?  
55  
56  
57  
58  
59  
60



1  
2  
3 **Interview topic guide for patients and carers (continued)**  
4  
5  
6

7 **C - Secondary care to patient:**  
8

- 9 d. What advice/instructions are you given when you see the doctor at the hospital?  
10  
11  
12 e. After you leave hospital, how do you know what to do to take best care of yourself  
13 (for the months ahead)?  
14  
15 f. Do you think that having a patient-held booklet for storing and transporting medical  
16 records would be useful? Would you carry a record booklet to healthcare  
17 appointments?  
18  
19  
20 g. Do you think that having a record booklet would help your self-management?  
21  
22  
23 h. Would you like to get detailed written information about your medicines, follow-up  
24 information and advice on lifestyle and self-management?  
25  
26  
27 i. Do you think that having information sheets would help your self-management?  
28  
29  
30

31 **D - Participant information to be collected:**  
32

- 33  
34 • Age  
35 • Gender  
36 • Religion  
37 • Highest level of education  
38 • Condition(s)  
39 • Years of having this conditions  
40 • Place village and district  
41  
42  
43  
44  
45  
46  
47  
48  
49  
50  
51  
52  
53  
54  
55  
56  
57  
58  
59  
60

### **Shortened interview topic guide for patients and carers**

1. What advice/instructions are you given when you see the doctor at the outpatient clinic?
2. Do you think that having a patient-held booklet for storing and transporting medical records would be useful? Would you carry a record booklet to healthcare appointments?
3. Do you think that having a record booklet would help you to manage your self-care at home?
4. Do you think that having information sheets would help you to manage your self-care at home?
5. Would you like to get detailed written information about your medicines, follow-up and lifestyle advice?

#### **Participant information to be collected:**

- Age
- Gender
- Religion
- Highest level of education
- Condition(s)
- Years of having this conditions
- Place village and district

S5. Figure 1. Similarities and differences between the content of IP & HCP data with related sub-categories

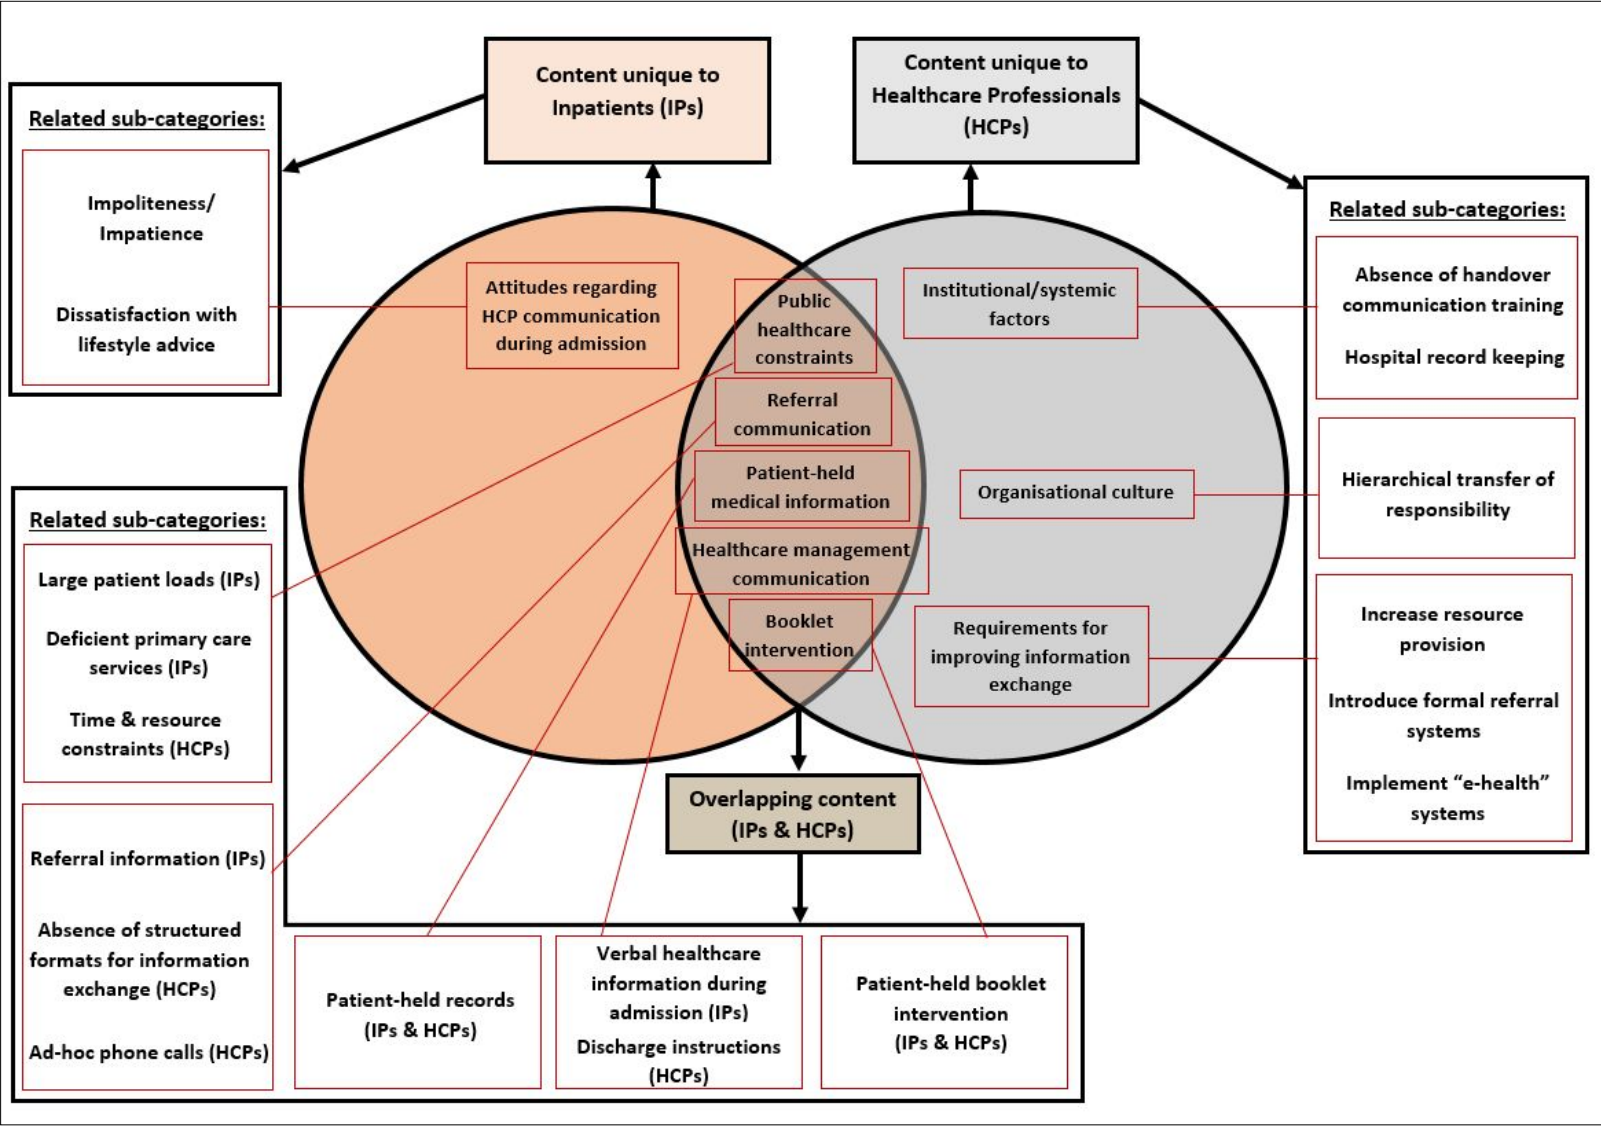

# Reporting checklist for qualitative study.

Based on the SRQR guidelines.

## Instructions to authors

Complete this checklist by entering the page numbers from your manuscript where readers will find each of the items listed below.

Your article may not currently address all the items on the checklist. Please modify your text to include the missing information. If you are certain that an item does not apply, please write "n/a" and provide a short explanation.

Upload your completed checklist as an extra file when you submit to a journal.

In your methods section, say that you used the SRQR reporting guidelines, and cite them as:

O'Brien BC, Harris IB, Beckman TJ, Reed DA, Cook DA. Standards for reporting qualitative research: a synthesis of recommendations. *Acad Med.* 2014;89(9):1245-1251.

|    | Reporting Item                                                                                                                                                                                                                       | Page Number |
|----|--------------------------------------------------------------------------------------------------------------------------------------------------------------------------------------------------------------------------------------|-------------|
| #1 | Concise description of the nature and topic of the study identifying the study as qualitative or indicating the approach (e.g. ethnography, grounded theory) or data collection methods (e.g. interview, focus group) is recommended | 1           |
| #2 | Summary of the key elements of the study using the abstract format of the intended publication; typically                                                                                                                            | 2-3         |

|    |                       |    |                                                           |      |
|----|-----------------------|----|-----------------------------------------------------------|------|
| 1  |                       |    | includes background, purpose, methods, results and        |      |
| 2  |                       |    |                                                           |      |
| 3  |                       |    | conclusions                                               |      |
| 4  |                       |    |                                                           |      |
| 5  |                       |    |                                                           |      |
| 6  | Problem formulation   | #3 | Description and significance of the problem /             | 4-5  |
| 7  |                       |    |                                                           |      |
| 8  |                       |    | phenomenon studied: review of relevant theory and         |      |
| 9  |                       |    |                                                           |      |
| 10 |                       |    | empirical work; problem statement                         |      |
| 11 |                       |    |                                                           |      |
| 12 |                       |    |                                                           |      |
| 13 | Purpose or research   | #4 | Purpose of the study and specific objectives or           | 5    |
| 14 | question              |    | questions                                                 |      |
| 15 |                       |    |                                                           |      |
| 16 |                       |    |                                                           |      |
| 17 |                       |    |                                                           |      |
| 18 |                       |    |                                                           |      |
| 19 | Qualitative approach  | #5 | Qualitative approach (e.g. ethnography, grounded          | 6-10 |
| 20 | and research paradigm |    | theory, case study, phenomenology, narrative research)    |      |
| 21 |                       |    | and guiding theory if appropriate; identifying the        |      |
| 22 |                       |    | research paradigm (e.g. postpositivist, constructivist /  |      |
| 23 |                       |    | interpretivist) is also recommended; rationale. The       |      |
| 24 |                       |    | rationale should briefly discuss the justification for    |      |
| 25 |                       |    | choosing that theory, approach, method or technique       |      |
| 26 |                       |    | rather than other options available; the assumptions      |      |
| 27 |                       |    | and limitations implicit in those choices and how those   |      |
| 28 |                       |    | choices influence study conclusions and transferability.  |      |
| 29 |                       |    | As appropriate the rationale for several items might be   |      |
| 30 |                       |    | discussed together.                                       |      |
| 31 |                       |    |                                                           |      |
| 32 |                       |    |                                                           |      |
| 33 |                       |    |                                                           |      |
| 34 |                       |    |                                                           |      |
| 35 |                       |    |                                                           |      |
| 36 |                       |    |                                                           |      |
| 37 |                       |    |                                                           |      |
| 38 |                       |    |                                                           |      |
| 39 |                       |    |                                                           |      |
| 40 |                       |    |                                                           |      |
| 41 |                       |    |                                                           |      |
| 42 |                       |    |                                                           |      |
| 43 |                       |    |                                                           |      |
| 44 |                       |    |                                                           |      |
| 45 |                       |    |                                                           |      |
| 46 | Researcher            | #6 | Researchers' characteristics that may influence the       | 7-10 |
| 47 | characteristics and   |    | research, including personal attributes, qualifications / |      |
| 48 | reflexivity           |    | experience, relationship with participants, assumptions   |      |
| 49 |                       |    | and / or presuppositions; potential or actual interaction |      |
| 50 |                       |    | between researchers' characteristics and the research     |      |
| 51 |                       |    |                                                           |      |
| 52 |                       |    |                                                           |      |
| 53 |                       |    |                                                           |      |
| 54 |                       |    |                                                           |      |
| 55 |                       |    |                                                           |      |
| 56 |                       |    |                                                           |      |
| 57 |                       |    |                                                           |      |
| 58 |                       |    |                                                           |      |
| 59 |                       |    |                                                           |      |
| 60 |                       |    |                                                           |      |

|    |                           |                                                             |       |
|----|---------------------------|-------------------------------------------------------------|-------|
| 1  |                           | questions, approach, methods, results and / or              |       |
| 2  |                           | transferability                                             |       |
| 3  |                           |                                                             |       |
| 4  |                           |                                                             |       |
| 5  |                           |                                                             |       |
| 6  | Context                   | #7 Setting / site and salient contextual factors; rationale | 6     |
| 7  |                           |                                                             |       |
| 8  |                           |                                                             |       |
| 9  | Sampling strategy         | #8 How and why research participants, documents, or         | 6-7   |
| 10 |                           | events were selected; criteria for deciding when no         |       |
| 11 |                           | further sampling was necessary (e.g. sampling               |       |
| 12 |                           | saturation); rationale                                      |       |
| 13 |                           |                                                             |       |
| 14 |                           |                                                             |       |
| 15 |                           |                                                             |       |
| 16 |                           |                                                             |       |
| 17 |                           |                                                             |       |
| 18 |                           |                                                             |       |
| 19 | Ethical issues pertaining | #9 Documentation of approval by an appropriate ethics       | 32    |
| 20 | to human subjects         | review board and participant consent, or explanation for    |       |
| 21 |                           | lack thereof; other confidentiality and data security       |       |
| 22 |                           | issues                                                      |       |
| 23 |                           |                                                             |       |
| 24 |                           |                                                             |       |
| 25 |                           |                                                             |       |
| 26 |                           |                                                             |       |
| 27 |                           |                                                             |       |
| 28 |                           |                                                             |       |
| 29 | Data collection methods   | #10 Types of data collected; details of data collection     | 7-9   |
| 30 |                           | procedures including (as appropriate) start and stop        |       |
| 31 |                           | dates of data collection and analysis, iterative process,   |       |
| 32 |                           | triangulation of sources / methods, and modification of     |       |
| 33 |                           | procedures in response to evolving study findings;          |       |
| 34 |                           | rationale                                                   |       |
| 35 |                           |                                                             |       |
| 36 |                           |                                                             |       |
| 37 |                           |                                                             |       |
| 38 |                           |                                                             |       |
| 39 |                           |                                                             |       |
| 40 |                           |                                                             |       |
| 41 |                           |                                                             |       |
| 42 |                           |                                                             |       |
| 43 | Data collection           | #11 Description of instruments (e.g. interview guides,      | 7-9   |
| 44 | instruments and           | questionnaires) and devices (e.g. audio recorders) used     |       |
| 45 |                           | for data collection; if / how the instruments(s) changed    |       |
| 46 |                           | over the course of the study                                |       |
| 47 | technologies              |                                                             |       |
| 48 |                           |                                                             |       |
| 49 |                           |                                                             |       |
| 50 |                           |                                                             |       |
| 51 |                           |                                                             |       |
| 52 |                           |                                                             |       |
| 53 | Units of study            | #12 Number and relevant characteristics of participants,    | 11-13 |
| 54 |                           | documents, or events included in the study; level of        |       |
| 55 |                           | participation (could be reported in results)                |       |
| 56 |                           |                                                             |       |
| 57 |                           |                                                             |       |
| 58 |                           |                                                             |       |
| 59 |                           |                                                             |       |
| 60 |                           |                                                             |       |

|    |                         |     |                                                             |       |
|----|-------------------------|-----|-------------------------------------------------------------|-------|
| 1  | Data processing         | #13 | Methods for processing data prior to and during             | 9-15  |
| 2  |                         |     | analysis, including transcription, data entry, data         |       |
| 3  |                         |     | management and security, verification of data integrity,    |       |
| 4  |                         |     | data coding, and anonymisation / deidentification of        |       |
| 5  |                         |     | excerpts                                                    |       |
| 6  |                         |     |                                                             |       |
| 7  |                         |     |                                                             |       |
| 8  |                         |     |                                                             |       |
| 9  |                         |     |                                                             |       |
| 10 |                         |     |                                                             |       |
| 11 |                         |     |                                                             |       |
| 12 |                         |     |                                                             |       |
| 13 | Data analysis           | #14 | Process by which inferences, themes, etc. were              | 9-10  |
| 14 |                         |     | identified and developed, including the researchers         |       |
| 15 |                         |     | involved in data analysis; usually references a specific    |       |
| 16 |                         |     | paradigm or approach; rationale                             |       |
| 17 |                         |     |                                                             |       |
| 18 |                         |     |                                                             |       |
| 19 |                         |     |                                                             |       |
| 20 |                         |     |                                                             |       |
| 21 |                         |     |                                                             |       |
| 22 |                         |     |                                                             |       |
| 23 | Techniques to enhance   | #15 | Techniques to enhance trustworthiness and credibility       | 9-10  |
| 24 | trustworthiness         |     | of data analysis (e.g. member checking, audit trail,        |       |
| 25 |                         |     | triangulation); rationale                                   |       |
| 26 |                         |     |                                                             |       |
| 27 |                         |     |                                                             |       |
| 28 |                         |     |                                                             |       |
| 29 |                         |     |                                                             |       |
| 30 |                         |     |                                                             |       |
| 31 | Syntheses and           | #16 | Main findings (e.g. interpretations, inferences, and        | 11-25 |
| 32 | interpretation          |     | themes); might include development of a theory or           |       |
| 33 |                         |     | model, or integration with prior research or theory         |       |
| 34 |                         |     |                                                             |       |
| 35 |                         |     |                                                             |       |
| 36 |                         |     |                                                             |       |
| 37 |                         |     |                                                             |       |
| 38 |                         |     |                                                             |       |
| 39 | Links to empirical data | #17 | Evidence (e.g. quotes, field notes, text excerpts,          | 18-25 |
| 40 |                         |     | photographs) to substantiate analytic findings              |       |
| 41 |                         |     |                                                             |       |
| 42 |                         |     |                                                             |       |
| 43 |                         |     |                                                             |       |
| 44 | Intergration with prior | #18 | Short summary of main findings; explanation of how          | 26-29 |
| 45 | work, implications,     |     | findings and conclusions connect to, support, elaborate     |       |
| 46 | transferability and     |     | on, or challenge conclusions of earlier scholarship;        |       |
| 47 | contribution(s) to the  |     | discussion of scope of application / generalizability;      |       |
| 48 | field                   |     | identification of unique contributions(s) to scholarship in |       |
| 49 |                         |     | a discipline or field                                       |       |
| 50 |                         |     |                                                             |       |
| 51 |                         |     |                                                             |       |
| 52 |                         |     |                                                             |       |
| 53 |                         |     |                                                             |       |
| 54 |                         |     |                                                             |       |
| 55 |                         |     |                                                             |       |
| 56 |                         |     |                                                             |       |
| 57 |                         |     |                                                             |       |
| 58 |                         |     |                                                             |       |
| 59 |                         |     |                                                             |       |
| 60 |                         |     |                                                             |       |

|    |                       |     |                                                          |    |
|----|-----------------------|-----|----------------------------------------------------------|----|
| 1  | Limitations           | #19 | Trustworthiness and limitations of findings              | 29 |
| 2  |                       |     |                                                          |    |
| 3  |                       |     |                                                          |    |
| 4  | Conflicts of interest | #20 | Potential sources of influence of perceived influence on | 32 |
| 5  |                       |     | study conduct and conclusions; how these were            |    |
| 6  |                       |     | managed                                                  |    |
| 7  |                       |     |                                                          |    |
| 8  |                       |     |                                                          |    |
| 9  |                       |     |                                                          |    |
| 10 |                       |     |                                                          |    |
| 11 |                       |     |                                                          |    |
| 12 | Funding               | #21 | Sources of funding and other support; role of funders in | 32 |
| 13 |                       |     | data collection, interpretation and reporting            |    |
| 14 |                       |     |                                                          |    |
| 15 |                       |     |                                                          |    |
| 16 |                       |     |                                                          |    |
| 17 |                       |     |                                                          |    |
| 18 |                       |     |                                                          |    |
| 19 |                       |     |                                                          |    |
| 20 |                       |     |                                                          |    |
| 21 |                       |     |                                                          |    |
| 22 |                       |     |                                                          |    |
| 23 |                       |     |                                                          |    |
| 24 |                       |     |                                                          |    |
| 25 |                       |     |                                                          |    |
| 26 |                       |     |                                                          |    |
| 27 |                       |     |                                                          |    |
| 28 |                       |     |                                                          |    |
| 29 |                       |     |                                                          |    |
| 30 |                       |     |                                                          |    |
| 31 |                       |     |                                                          |    |
| 32 |                       |     |                                                          |    |
| 33 |                       |     |                                                          |    |
| 34 |                       |     |                                                          |    |
| 35 |                       |     |                                                          |    |
| 36 |                       |     |                                                          |    |
| 37 |                       |     |                                                          |    |
| 38 |                       |     |                                                          |    |
| 39 |                       |     |                                                          |    |
| 40 |                       |     |                                                          |    |
| 41 |                       |     |                                                          |    |
| 42 |                       |     |                                                          |    |
| 43 |                       |     |                                                          |    |
| 44 |                       |     |                                                          |    |
| 45 |                       |     |                                                          |    |
| 46 |                       |     |                                                          |    |
| 47 |                       |     |                                                          |    |
| 48 |                       |     |                                                          |    |
| 49 |                       |     |                                                          |    |
| 50 |                       |     |                                                          |    |
| 51 |                       |     |                                                          |    |
| 52 |                       |     |                                                          |    |
| 53 |                       |     |                                                          |    |
| 54 |                       |     |                                                          |    |
| 55 |                       |     |                                                          |    |
| 56 |                       |     |                                                          |    |
| 57 |                       |     |                                                          |    |
| 58 |                       |     |                                                          |    |
| 59 |                       |     |                                                          |    |
| 60 |                       |     |                                                          |    |

The SRQR checklist is distributed with permission of Wolters Kluwer © 2014 by the Association of American Medical Colleges. This checklist was completed on 26. November 2018 using <http://www.goodreports.org/>, a tool made by the [EQUATOR Network](#) in collaboration with [Penelope.ai](#)



# BMJ Open

## Patient and healthcare provider knowledge, attitudes and barriers to handover and healthcare communication during chronic disease inpatient care in India: A qualitative exploratory study

|                                 |                                                                                                                                                                                                                                                                                                                                                                                                                                                                                                                                                                                                                                                                                                                                                      |
|---------------------------------|------------------------------------------------------------------------------------------------------------------------------------------------------------------------------------------------------------------------------------------------------------------------------------------------------------------------------------------------------------------------------------------------------------------------------------------------------------------------------------------------------------------------------------------------------------------------------------------------------------------------------------------------------------------------------------------------------------------------------------------------------|
| Journal:                        | <i>BMJ Open</i>                                                                                                                                                                                                                                                                                                                                                                                                                                                                                                                                                                                                                                                                                                                                      |
| Manuscript ID                   | bmjopen-2018-028199.R1                                                                                                                                                                                                                                                                                                                                                                                                                                                                                                                                                                                                                                                                                                                               |
| Article Type:                   | Original research                                                                                                                                                                                                                                                                                                                                                                                                                                                                                                                                                                                                                                                                                                                                    |
| Date Submitted by the Author:   | 13-Sep-2019                                                                                                                                                                                                                                                                                                                                                                                                                                                                                                                                                                                                                                                                                                                                          |
| Complete List of Authors:       | Humphries, Claire; University of Birmingham, UK, Institute of Applied Health Research<br>Jaganathan, Suganthi ; Centre for Chronic Disease Control<br>Panniyammakal, Jeemon ; Centre for Chronic Disease Control<br>Singh, Sanjeev; Amrita Institute of Medical Sciences and Research Centre; Amrita Institute of Medical Sciences and Research Centre<br>Goenka, Shifalika; Public Health Foundation of India<br>Dorairaj, Prabhakaran ; Centre for Chronic Disease Control<br>Gill, Paramjit ; University of Warwick<br>Greenfield, Sheila; University of Birmingham, Primary Care Clinical Sciences<br>Lilford, Richard; University of Warwick, Division of Health and Population Sciences<br>Manaseki-Holland, Semira; University of Birmingham, |
| <b>Primary Subject Heading</b>: | Public health                                                                                                                                                                                                                                                                                                                                                                                                                                                                                                                                                                                                                                                                                                                                        |
| Secondary Subject Heading:      | Health services research, Qualitative research                                                                                                                                                                                                                                                                                                                                                                                                                                                                                                                                                                                                                                                                                                       |
| Keywords:                       | International health services < HEALTH SERVICES ADMINISTRATION & MANAGEMENT, Quality in health care < HEALTH SERVICES ADMINISTRATION & MANAGEMENT, PUBLIC HEALTH, QUALITATIVE RESEARCH                                                                                                                                                                                                                                                                                                                                                                                                                                                                                                                                                               |
|                                 |                                                                                                                                                                                                                                                                                                                                                                                                                                                                                                                                                                                                                                                                                                                                                      |

SCHOLARONE™  
Manuscripts

1  
2  
3  
4 1 **Patient and healthcare provider knowledge,**  
5  
6  
7 2 **attitudes and barriers to handover and healthcare**  
8  
9  
10 3 **communication during chronic disease inpatient**  
11  
12  
13 4 **care in India: A qualitative exploratory study**  
14  
15  
16  
17  
18  
19  
20  
21  
22

23 6 Claire Humphries<sup>1¶</sup>, Suganthi Jaganathan<sup>2,3¶</sup>, Jeemon Panniyammakal<sup>2,3,4</sup>, Sanjeev  
24 7 Singh<sup>5</sup>, Shifalika Goenka<sup>2,3</sup>, Prabhakaran Dorairaj<sup>2,3</sup>, Paramjit Gill<sup>5</sup>, Sheila  
25 8 Greenfield<sup>1</sup>, Richard Lilford<sup>6</sup>, Semira Manaseki-Holland<sup>1\*</sup>  
26  
27  
28  
29

30 10 <sup>1</sup> Institute of Applied Health Research, University of Birmingham, Birmingham, West  
31 11 Midlands, United Kingdom

32 12 <sup>2</sup> Public Health Foundation of India, New Delhi, Delhi, India

33 13 <sup>3</sup> Centre for Chronic Disease Control, New Delhi, Delhi, India

34 14 <sup>4</sup> Sree Chitra Tirunal Institute of Medical Sciences and Technology, Trivandrum,  
35 15 Kerala, India

36 16 <sup>5</sup> Hospital Administration, Amrita Institute of Medical Sciences, Kochi, Kerala, India

37 17 <sup>6</sup> Centre for Applied Health Research and Delivery, University of Warwick, Warwick,  
38 18 Warwickshire, United Kingdom

39 19

40 20 \*Corresponding author

41 21 Email: S.ManasekiHolland@bham.ac.uk  
42  
43  
44  
45

46 22

47 23

48 24 <sup>¶</sup> These authors contributed equally to this work.  
49  
50  
51  
52  
53  
54  
55  
56  
57  
58  
59  
60

## 27 **ABSTRACT**

28 **Objectives** To investigate patient and healthcare provider (HCP) knowledge,  
29 attitudes and barriers to handover and healthcare communication during inpatient  
30 care and explore interventions for improving storage and transfer of healthcare  
31 information.

32 **Methods** *Design:* Qualitative study comprising 41 semi-structured, individual  
33 interviews. Thematic analysis using the Framework Method with analyst  
34 triangulation. *Setting:* Three hospitals in Himachal Pradesh and Kerala, India.  
35 *Participants:* 20 male (n=10) and female (n=10) chronic non-communicable disease  
36 (NCD) patients and 21 male (n=15) and female (n=6) HCPs. Purposive sampling  
37 was used to identify patients with chronic NCDs (Chronic Respiratory Disease,  
38 Cardiovascular Disease, Diabetes or Hypertension) and HCPs.

39 **Results** Chronic NCD patient themes: (1) *Public healthcare service characteristics;*  
40 (2) *HCP-patient communication;* (3) *Attitudes regarding medical information.* HCP  
41 themes: (1) *System factors;* (2) *Information exchange practices;* (3) *Quality*  
42 *improvement strategies.* Both patients and HCPs recognised public healthcare  
43 constraints that increased pressure on hospitals and subsequently limited  
44 consultation times. Systemic issues reported by HCPs were a lack of formal  
45 handover systems, training and accessible hospital-based records. Healthcare  
46 management communication during admission was inconsistent and lacked patient-  
47 centeredness, evidenced by patient reports of varying levels of information received  
48 and some dissatisfaction with lifestyle advice. Senior doctors reported passing the  
49 writing discharge notes to juniors when busy with high patient loads. Nurses reported  
50 providing the majority of discharge instructions to patients verbally. Patient-held

1  
2  
3 51 documents served as a vehicle for information exchange between HCPs, but were  
4  
5 52 not always transported. HCPs and patients expressed positive views towards  
6  
7 53 introducing patient-held booklets to improve organisation and transfer of documents.  
8  
9  
10 54 **Conclusions** Handover and healthcare communication during chronic NCD inpatient  
11  
12 55 care is suboptimal. Structured information exchange systems and HCP training are  
13  
14 56 required to improve continuity and safety of care during critical transitions such as  
15  
16 57 referral and discharge. Findings suggest that patient-held booklets may also assist in  
17  
18 58 enhancing handover and patient-centred practices.  
19  
20  
21  
22 59  
23  
24 60  
25  
26 61  
27  
28 62  
29  
30 63  
31  
32 64  
33  
34 65  
35  
36 66  
37  
38 67  
39  
40 68  
41  
42 69  
43  
44 70  
45  
46 71  
47  
48 72  
49  
50 73  
51  
52 74  
53  
54 75  
55  
56  
57  
58  
59  
60

## STRENGTHS AND LIMITATIONS OF THIS STUDY

- As far as the authors are aware, this is the first study to qualitatively explore factors affecting multiple areas of handover communication for chronic disease inpatients in India.
- The number of interviews conducted with both patients and healthcare providers ensured data saturation and provided a variety of critical perspectives.
- Analyst triangulation corroborated data analysis and strengthened the credibility of the study.
- The accuracy of recall of inpatients interviewed at home (i.e. following hospital discharge) may have been limited by the delay between study recruitment and subsequent data collection.
- Awareness of the interviewer's context as a public health researcher may have resulted in participants distorting their responses to minimise critical judgement.

# 1. INTRODUCTION

The increasing burden of chronic, non-communicable diseases (NCDs) such as cardiovascular disease, diabetes and chronic respiratory disease has become a global pandemic that is disproportionately affecting low and middle-income countries (LMICs).<sup>1</sup> This is placing great demand on under-resourced health systems that can only be relieved by employing efficient and integrated approaches to healthcare management. Central to efficiency and integration in healthcare is effective handover communication, which involves the exchange of patient-specific information between healthcare providers (HCPs) and between HCPs and patients/carers.<sup>2</sup>

Between HCPs, information exchange is critical during clinical handovers, which are the points in care where information, responsibility and accountability for patient care are transferred from one HCP to another.<sup>3</sup> Such exchange is vital because safe and effective treatment can only be maintained if all relevant information has been shared and understood.<sup>4</sup> A wealth of research from high-income countries (HICs) has evidenced the association between communicative breakdowns during care transitions and risks to patient safety. Such risks are pervasive throughout many aspects of inpatient care and include delays in diagnosis, medication errors and life-threatening adverse events.<sup>5 6</sup> In particular, one-in-five patients experience adverse events following hospital discharge and research has established a link between such events and deficient handover communication.<sup>7-10</sup> Effective information exchange between HCPs and patients is also vital, as patients can provide valuable information to HCPs involved at various stages of their care pathway.<sup>4</sup> Excellent HCP-patient healthcare communication also empowers patients to become active participants in their healthcare management; this is a key aspect of

1  
2  
3 131 patient-centred care, which has been linked to improved patient satisfaction and  
4  
5 132 outcomes.<sup>11</sup>  
6

7  
8 133 Despite the established importance of handover communication for health  
9  
10 134 systems functioning and patient safety in HICs, there has been a relative dearth of  
11  
12 135 LMIC-based research on this topic.<sup>12</sup> One recent (2019) study from South Africa  
13  
14 136 found inadequate discharge planning to be a significant contributor to avoidable  
15  
16 137 causes of hospital readmission.<sup>13</sup> Across India, a handful of single-site studies have  
17  
18 138 evaluated and described deficiencies in information exchange during hospital shift-  
19  
20 139 change and discharge.<sup>14-16</sup> The current study forms part of a series completed for a  
21  
22 140 project investigating handover and continuity of care for chronic NCD patients in  
23  
24 141 Kerala and Himachal Pradesh states, India. The first study to have been  
25  
26 142 disseminated focussed on outpatient care, which found issues of sub-optimal  
27  
28 143 recording of information within patient-held medical documents and an absence of  
29  
30 144 formal systems for exchanging information between levels of care.<sup>17</sup>  
31  
32  
33  
34

35 145 Given these emerging challenges and the established critical link between  
36  
37 146 deficient handover communication and risks to inpatient safety, the current study  
38  
39 147 was conducted to gain novel insight into the transfer of healthcare information during  
40  
41 148 chronic NCD inpatient care across the same study areas of India. The primary  
42  
43 149 objective was to explore knowledge, attitudes and barriers to handover and  
44  
45 150 healthcare communication during the following points of inpatient care:  
46  
47  
48

- 49 151 • Referral/transfer (i.e. communication between HCPs and between HCPs and  
50  
51 152 patients when referring and/or transferring patients)  
52  
53 153 • Hospital admission and discharge (i.e. communication between HCPs and  
54  
55 154 patients regarding condition, treatment and/or management during hospital  
56  
57 155 admission and discharge)  
58  
59  
60

1  
2  
3 156 A secondary objective was to explore possible interventions to improve the  
4  
5  
6 157 storage and transfer of critical healthcare information.  
7  
8  
9 158

10  
11  
12 159

## 13 14 15 160 **2. METHODS**

### 16 17 18 161 **2.1 Overview**

19  
20  
21  
22 162 We report findings from a qualitative study of handover communication for  
23  
24 163 chronic NCD inpatients in two Indian states. This study was conducted from  
25  
26 164 December 2014 to November 2015 across three hospitals: one rural secondary-care  
27  
28 165 hospital in Himachal Pradesh state, and one peri-urban secondary-care and one  
29  
30 166 urban tertiary-care hospital in Kerala state. These settings were selected to capture  
31  
32  
33 167 a range of hospital types within different geographical settings. We selected public  
34  
35 168 rather than private facilities as this is where a large proportion of socio-economically  
36  
37 169 vulnerable patients access healthcare. See supplementary files “S1” and “S2” for  
38  
39 170 further information regarding the Indian healthcare system and study settings.  
40  
41  
42  
43 171

### 44 45 46 172 **2.2 Participant recruitment**

#### 47 48 49 50 173 **2.2.1 Patients**

51  
52  
53 174 Inpatients were recruited opportunistically from hospitals by trained research  
54  
55 175 assistants (n=6).<sup>18</sup> Purposive sampling was used to identify individuals who met the  
56  
57 176 following inclusion criteria: adults (18 years+),<sup>19</sup> admitted to hospital within 24 hours  
58  
59 177 of a researcher first meeting them, due to complications from one of the following  
60



1  
2  
3 178 chronic NCDs: cardiovascular disease, chronic respiratory disease, diabetes  
4  
5 179 mellitus, or hypertension. The identification process took place via researchers  
6  
7  
8 180 approaching ward nurses and asking them about patient demographic and  
9  
10 181 admission details; patients were excluded if judged too unwell to participate by ward  
11  
12 182 nurses. Patients who met the inclusion criteria were provided with verbal and  
13  
14 183 documented study information. Written consent was obtained from literate patients.  
15  
16  
17 184 For illiterate patients, oral consent was obtained along with a thumbprint and  
18  
19 185 signature from a literate witness (i.e. family member/carer) in line with World Health  
20  
21 186 Organisation guidelines.<sup>20</sup> Inpatients were recruited until theoretical saturation was  
22  
23  
24 187 achieved;<sup>21</sup> A total of 20 inpatients participated.  
25  
26  
27 188

### 189 **2.2.2 Healthcare Professionals**

190 Healthcare professionals (HCPs) were recruited from study hospitals by  
191 trained research assistants (n=6). Due to the busy nature of the study settings,  
192 opportunistic sampling was used to recruit as many HCPs as possible with a range  
193 of roles and experience.<sup>18</sup> During recruitment, if HCPs stated they were too busy to  
194 answer questions they were marked as “unavailable” and not approached again that  
195 day - this did not exclude them from participating at another time. HCPs were also  
196 recruited until theoretical saturation was achieved;<sup>21</sup> A total of 21 HCPs participated.  
197

## 198 **2.3 Sample Size**

199 As well as saturation being reached for both participant groups independently,  
200 the resulting sample size of 41 participants for this study was in accordance with

1  
2  
3 201 Baker and Edwards' review of sample sizes utilised in qualitative literature, indicating  
4  
5 202 it was sufficient for achieving overall data saturation.<sup>22</sup>  
6  
7  
8  
9 203

## 11 204 **2.4 Data collection**

15 205 The inpatient data analysed for this study is independent from the outpatient  
16  
17 206 study and was collected using separate topic guides. Regarding HCP data, this  
18  
19 207 study involves secondary analysis of HCP interviews (n=17) included in the  
20  
21 208 outpatient study from participants who were also involved in inpatient care. A small  
22  
23 209 number of additional interviews with HCPs solely involved in inpatient care (n=4)  
24  
25 210 have also been analysed in this study. All HCP interviews in the India handover  
26  
27 211 project were conducted within the same study period and used the same topic guide  
28  
29 212 (as most HCPs in the study areas worked with both outpatients and inpatients on a  
30  
31 213 daily basis).  
32  
33  
34  
35

36 214 All interview data was collected entirely by the lead Indian researcher (SJ – an  
37  
38 215 experienced public health researcher) who was familiar with, but not local to, all  
39  
40 216 study areas and fluent in all local Indian dialects and English. Full consideration was  
41  
42 217 given prior to and throughout data collection to ensure that SJ was aware of the  
43  
44 218 potential limitations of working with participants from culturally and linguistically  
45  
46 219 diverse backgrounds. SJ was not involved in patient treatment or previously known  
47  
48 220 to HCPs.  
49  
50  
51  
52

53 221 The majority (n=16) of patient interviews took place in study hospitals. Due to  
54  
55 222 a lack of private spaces, they were conducted on inpatient wards in as quiet and  
56  
57 223 private a manner as possible. All participants consented to this and it was ensured  
58  
59 224 that HCPs were not present during inpatient interviews. In addition, a small number  
60

1  
2  
3 225 of patient interviews (n=4) took place in patients' homes either five weeks (n=2) or  
4  
5 226 four months (n=2) following hospital discharge, as this was more convenient for them  
6  
7 227 (i.e. during recruitment they were in the process of being discharged and leaving  
8  
9 228 hospital). The specific follow-up times coincided with community visits being  
10  
11 229 completed for another quantitative study within the India handover project, which the  
12  
13 230 four patients were also participating in. All HCP interviews took place in hospital  
14  
15 231 offices. Interviews with patients and HCPs were conducted in either Hindi, English,  
16  
17 232 Malayalam or a mixture depending on interviewee preference and audio recorded  
18  
19 233 using a digital Dictaphone.  
20  
21  
22  
23

24 234 Data collection took place in two stages. In the first stage (December 2014–  
25  
26 235 October 2015), pre-prepared topic guides were used to guide interviews (see  
27  
28 236 supplementary file “S3”). These were developed using relevant handover literature  
29  
30 237 and local knowledge of health systems functioning within the study areas. They were  
31  
32 238 also piloted over three rounds prior to commencement of data collection to ensure  
33  
34 239 they were clear as well as culturally and contextually appropriate. Patient topic  
35  
36 240 guides included open-ended questions focussing on healthcare utilisation,  
37  
38 241 experiences and attitudes of healthcare visits and information exchange. The HCP  
39  
40 242 topic guides differed slightly to capture information on health systems policies and/or  
41  
42 243 practices; it also included questions regarding handover training and potential  
43  
44 244 interventions for improving practices.  
45  
46  
47  
48  
49

50 245 Following the first stage of data collection, on the 11<sup>th</sup> of October 2015, a  
51  
52 246 handover expert's meeting took place in Delhi, India to present preliminary findings  
53  
54 247 and discuss possible interventions. Researchers from the University of Birmingham  
55  
56 248 and University of Warwick (UK) facilitated the presentation of results and group  
57  
58 249 discussions at the meeting. Representatives (n=27) from the following international,  
59  
60

1  
2  
3 250 Indian national and state-level organisations participated: The World Health  
4  
5 251 Organisation; The World Bank; ACCESS Health International; The Ministry of Health  
6  
7 252 and Family Welfare; The Public Health Foundation of India; The National Centre for  
8  
9 253 Disease Control; The Centre for Chronic Disease Control; The National Health  
10  
11 254 System Resource Centre; The All India Institute of Medical Sciences; Aga Khan  
12  
13 255 Health Services; AMRITA Institute of Medical Sciences and Fortis Hospitals. During  
14  
15 256 discussions, a consensus was reached that patient-held booklets were likely to be an  
16  
17 257 acceptable and sustainable intervention to improve information exchange. This was  
18  
19 258 based on the international success of similar patient-held records used in maternal  
20  
21 259 healthcare around the world.<sup>23-27</sup> It also took into account the delays in developing  
22  
23 260 universal electronic information systems and the fact that such systems will not  
24  
25 261 necessarily address the quality of communication between HCPs and patients.  
26  
27 262 Overall, it was opted as the most pragmatic, cost-effective intervention and multiple  
28  
29 263 experts felt that booklets could also improve patient self-management if they  
30  
31 264 contained disease-specific advice.  
32  
33  
34  
35  
36

37  
38 265 Therefore, following the meeting the second stage of qualitative data  
39  
40 266 collection (October–November 2015) commenced. Topic guides were updated to  
41  
42 267 include questions regarding the utility of patient-held booklets (see supplementary  
43  
44 268 file “S4”). In addition, if participants stated they had limited time then researchers  
45  
46 269 interviewed them using a shortened topic guide containing targeted questions on  
47  
48 270 patient-held booklets (see supplementary file “S4”).  
49  
50  
51  
52

53 271

## 56 272 **2.5 Data Analysis**

57  
58  
59  
60

1  
2  
3 273 All audio recordings of interviews were transcribed verbatim and, if necessary,  
4  
5 274 translated into English by SJ. All translations were crosschecked for accuracy by a  
6  
7  
8 275 qualitative expert and co-author in India (SG), who was also familiar with the local  
9  
10 276 context and fluent in all languages utilised during interviews. Following this, all  
11  
12 277 transcripts were sent to the lead UK researcher (CH – public health PhD student) for  
13  
14 278 analysis. CH became familiar with all study sites prior to analysis during research-  
15  
16 279 related visits that were facilitated by the Public Health Foundation of India and the  
17  
18 280 Ministry of Health and Family Welfare in Kerala; visits took place after participation in  
19  
20 281 the handover expert's meeting in Delhi.  
21  
22  
23

24 282 Data was analysed using the Framework Method,<sup>28</sup> as this is the method most  
25  
26 283 commonly used for semi-structured interview transcripts. An inductive thematic  
27  
28 284 approach to analysis utilised in Grounded Theory was employed,<sup>29 30</sup> which focused  
29  
30 285 on analysing interviews in their entirety and identifying concepts relevant to handover  
31  
32 286 and healthcare communication during inpatient care that emerged from interviews.  
33  
34 287 Analysis occurred through the following stages central to the Framework Method:  
35  
36 288 transcription, familiarisation, coding, charting, and interpretation. Over a one-month  
37  
38 289 period, familiarisation with the data took place via slow reading of transcripts and CH  
39  
40 290 consulted with SJ to gain a clear understanding of interview contexts. Once this was  
41  
42 291 complete, coding began and two transcripts were chosen at random from each batch  
43  
44 292 of interviews (i.e. 2 inpatients and 2 HCP transcripts) for independent coding by an  
45  
46 293 additional UK analyst (SG – professor of medical sociology with expertise in cross-  
47  
48 294 cultural research) for analyst triangulation.<sup>31</sup> Inpatient and HCP transcripts were  
49  
50 295 coded separately in order to be able to assess similarities and differences between  
51  
52 296 participant groups - Inpatient transcripts were coded first. The coding process  
53  
54 297 involved further familiarisation with the data, followed by open coding where certain  
55  
56  
57  
58  
59  
60

1  
2  
3 298 transcript content was highlighted and allocated descriptive labels (codes) to  
4  
5 299 interpret the phenomena identified in the text. The development of codes and  
6  
7 300 themes was entirely data-led and analysed manually.<sup>32</sup>  
8  
9

10  
11 301 Microsoft Excel was used to organise participant codes. CH created initial  
12  
13 302 categories by clustering similar codes developed from the two randomly selected  
14  
15 303 inpatient and HCP transcripts. CH and the additional analyst (SG) then met to  
16  
17 304 discuss their analyses. As both had produced similar codes and concepts, the  
18  
19 305 categories that were created were mutually agreed upon. CH then continued with  
20  
21 306 category development until all transcripts had been coded and inserted onto the  
22  
23 307 spreadsheet. Following analysis of 20 inpatient and 26 HCP transcripts, no new  
24  
25 308 categories had been produced. This served as confirmation that data saturation had  
26  
27 309 been met.<sup>21</sup>  
28  
29  
30  
31

32  
33 310 Following coding, categories were grouped into subcategories and linked to  
34  
35 311 produce themes. Then, via the process of charting,<sup>28 32</sup> themes for each participant  
36  
37 312 group were used to create a framework matrix into which participants' quotes were  
38  
39 313 inserted, corresponding to their representative subcategory. This provided a visual  
40  
41 314 representation of themes, which facilitated the mapping and interpretation of the  
42  
43 315 data. After completing separate analysis of patient and HCP data, results of both  
44  
45 316 participant groups were compared to assess similarities and differences between  
46  
47 317 their reports of knowledge, attitudes and barriers to handover and healthcare  
48  
49 318 communication. A Venn diagram was used to summarise the separate and  
50  
51 319 overlapping content, which was linked to sub-categories from original themes.  
52  
53  
54  
55  
56  
57  
58

## 59 321 **2.7 Patient and public involvement**

60

1  
2  
3 322 Patients and the public were not involved in the initial design of this study.  
4  
5 323 Patients and carers were first involved during the pilot phase prior to formal data  
6  
7 324 collection, where the topic guides, consent and information sheets were piloted over  
8  
9 325 three rounds. During this time, they were consulted and given the opportunity to  
10  
11 326 provide feedback in order to ensure the study materials were comprehensible and  
12  
13 327 culturally and contextually appropriate. Patients and the public were not involved in  
14  
15 328 any other aspect of the study recruitment or conduct, but findings have been  
16  
17 329 disseminated publicly via an experts meeting (including professionals working with  
18  
19 330 patient groups) and open access web pages.  
20  
21  
22  
23  
24  
25  
26  
27  
28  
29

331

332

### 333 **3. RESULTS**

#### 334 **3.1 Inpatient characteristics**

335 20 male (n=10) and female (n=10) inpatients aged between 25 and 71 were  
336 interviewed. Participants' background characteristics were varied (Table 1).  
337 Inpatients completed interviews in English (n=11), Hindi (n=4), Malayalam (n=4) and  
338 a mixture of Hindi and English (n=1).

Table 1. Inpatient characteristics

| Characteristics                                        | 1  | 2  | 3  | 4  | 5  | 6  | 7  | 8  | 9  | 10 | 11 | 12 | 13 | 14 | 15 | 16 | 17 | 18 | 19 | 20 | N (%)   |
|--------------------------------------------------------|----|----|----|----|----|----|----|----|----|----|----|----|----|----|----|----|----|----|----|----|---------|
| <b>Age</b>                                             | 65 | 45 | 70 | 58 | 71 | 56 | 57 | 70 | 55 | 25 | 72 | 50 | 55 | 69 | 70 | 50 | 70 | 70 | 70 | 70 | 25-71   |
| <b>Sex</b>                                             |    |    |    |    |    |    |    |    |    |    |    |    |    |    |    |    |    |    |    |    |         |
| Male                                                   | ✓  | ✓  | ✓  | ✓  | ✓  |    |    |    | ✓  | ✓  | ✓  | ✓  |    |    |    | ✓  |    |    |    |    | 10 (50) |
| Female                                                 |    |    |    |    |    | ✓  | ✓  | ✓  |    |    |    |    | ✓  | ✓  | ✓  |    | ✓  | ✓  | ✓  | ✓  | 10 (50) |
| <b>Literacy</b>                                        |    |    |    |    |    |    |    |    |    |    |    |    |    |    |    |    |    |    |    |    |         |
| Illiterate                                             |    |    |    |    |    |    |    | ✓  |    |    |    |    | ✓  |    | ✓  | ✓  | ✓  | ✓  | ✓  | ✓  | 8 (40)  |
| Literate                                               | ✓  | ✓  | ✓  | ✓  | ✓  | ✓  | ✓  |    | ✓  | ✓  | ✓  | ✓  |    | ✓  |    |    |    |    |    |    | 12 (60) |
| <b>Education Level</b>                                 |    |    |    |    |    |    |    |    |    |    |    |    |    |    |    |    |    |    |    |    |         |
| None/minimal primary school-level                      |    |    |    |    |    |    |    | ✓  |    |    |    | ✓  | ✓  |    | ✓  | ✓  | ✓  | ✓  | ✓  | ✓  | 9 (45)  |
| Completed lower primary school                         |    |    |    |    | ✓  |    | ✓  |    |    |    |    |    |    |    |    |    |    |    |    |    | 2 (10)  |
| Completed upper primary school                         |    |    |    |    |    | ✓  |    |    |    |    |    |    |    |    |    |    |    |    |    |    | 1 (5)   |
| Completed secondary school                             |    |    |    |    |    |    |    |    | ✓  |    |    |    |    |    |    |    |    |    |    |    | 1 (5)   |
| Completed higher vocational studies                    |    |    |    |    |    |    |    |    |    |    |    |    |    |    |    |    |    |    |    |    | 0 (0)   |
| University graduate (or above)                         | ✓  |    |    | ✓  |    |    |    |    |    | ✓  | ✓  |    |    |    |    |    |    |    |    |    | 4 (20)  |
| No data                                                |    | ✓  | ✓  |    |    |    |    |    |    |    |    |    |    | ✓  |    |    |    |    |    |    | 3 (15)  |
| <b>Employment Status</b>                               |    |    |    |    |    |    |    |    |    |    |    |    |    |    |    |    |    |    |    |    |         |
| Employed                                               |    | ✓  |    | ✓  | ✓  |    |    |    | ✓  |    |    | ✓  | ✓  | ✓  |    | ✓  |    |    |    |    | 8 (40)  |
| Unemployed                                             |    |    |    |    |    | ✓  | ✓  | ✓  |    |    |    |    |    |    | ✓  |    | ✓  | ✓  | ✓  | ✓  | 8 (40)  |
| Student                                                |    |    |    |    |    |    |    |    |    | ✓  |    |    |    |    |    |    |    |    |    |    | 1 (5)   |
| Retired                                                | ✓  |    | ✓  |    |    |    |    |    |    |    | ✓  |    |    |    |    |    |    |    |    |    | 3 (15)  |
| <b>Chronic NCD(s) (related to admission)</b>           |    |    |    |    |    |    |    |    |    |    |    |    |    |    |    |    |    |    |    |    |         |
| Chronic Respiratory Disease                            |    |    | ✓  | ✓  |    | ✓  |    | ✓  |    |    |    |    | ✓  |    |    | ✓  |    |    |    |    | 6 (30)  |
| Diabetes                                               | ✓  |    |    |    |    |    |    |    |    |    |    |    |    | ✓  | ✓  | ✓  | ✓  | ✓  | ✓  | ✓  | 8 (40)  |
| Hypertension                                           |    |    |    |    |    |    |    |    | ✓  |    | ✓  | ✓  |    |    | ✓  | ✓  | ✓  |    |    |    | 6 (30)  |
| Cardiovascular Disease (other than Hypertension alone) | ✓  | ✓  |    |    | ✓  |    | ✓  | ✓  | ✓  | ✓  | ✓  | ✓  |    |    |    |    |    |    |    |    | 9 (45)  |
| <b>Language(s) used during Interview</b>               |    |    |    |    |    |    |    |    |    |    |    |    |    |    |    |    |    |    |    |    |         |
| English (only)                                         | ✓  | ✓  | ✓  | ✓  |    |    |    |    |    |    |    |    |    | ✓  | ✓  | ✓  | ✓  | ✓  | ✓  | ✓  | 11 (55) |
| Hindi (only)                                           |    |    |    |    |    | ✓  | ✓  | ✓  | ✓  |    |    |    |    |    |    |    |    |    |    |    | 4 (20)  |
| Malayalam (only)                                       |    |    |    |    |    |    |    |    |    | ✓  | ✓  | ✓  | ✓  |    |    |    |    |    |    |    | 4 (20)  |
| English & Hindi (mixture)                              |    |    |    |    | ✓  |    |    |    |    |    |    |    |    |    |    |    |    |    |    |    | 1 (5)   |



### 3.2 Healthcare Professional characteristics

21 male (n=15) and female (n=6) HCPs aged between 22 and 55 were interviewed. HCP roles included doctors (n=17), nurses (n=2), pharmacists (n=1) and medical records officers (n=1). HCP qualifications and experience were varied (Table 2). HCPs completed interviews in English (n=15), Hindi (n=2), Malayalam (n=2) and a mixture of Hindi and English (n=2).

For peer review only

Table 2. Healthcare professional characteristics

| Characteristics                          | 1  | 2  | 3  | 4  | 5  | 6  | 7  | 8  | 9  | 11 | 14 | 15 | 18 | 19 | 20 | 21 | 22 | 23 | 24 | 25 | 26 | N (%)     |         |
|------------------------------------------|----|----|----|----|----|----|----|----|----|----|----|----|----|----|----|----|----|----|----|----|----|-----------|---------|
| <b>Age</b>                               | 44 | 24 | 33 | 25 | 23 | 39 | 44 | 35 | 52 | 50 | 50 | 43 | 50 | 40 | 46 | 55 | 22 | 35 | 35 | 45 | 35 | 22-55     |         |
| <b>Sex</b>                               |    |    |    |    |    |    |    |    |    |    |    |    |    |    |    |    |    |    |    |    |    |           |         |
| Male                                     | ✓  |    | ✓  | ✓  | ✓  |    | ✓  |    | ✓  | ✓  | ✓  | ✓  | ✓  | ✓  | ✓  | ✓  | ✓  |    |    |    | ✓  | 15 (71.4) |         |
| Female                                   |    | ✓  |    |    |    | ✓  |    | ✓  |    |    |    |    |    |    |    |    |    | ✓  | ✓  |    | ✓  | 6 (28.6)  |         |
| <b>Qualification/s*</b>                  |    |    |    |    |    |    |    |    |    |    |    |    |    |    |    |    |    |    |    |    |    |           |         |
| Doctor of Medicine (MD)                  | ✓  |    | ✓  |    |    |    | ✓  | ✓  | ✓  | ✓  | ✓  | ✓  | ✓  | ✓  | ✓  | ✓  | ✓  |    |    |    |    | 13 (61.9) |         |
| Master of Public Health (MPH)            |    |    |    |    |    | ✓  |    |    |    |    |    |    |    |    |    |    |    |    |    |    |    | 1 (4.8)   |         |
| Bachelor of Medicine (MBBS)              | ✓  | ✓  | ✓  | ✓  | ✓  | ✓  | ✓  | ✓  | ✓  | ✓  | ✓  | ✓  | ✓  | ✓  | ✓  | ✓  | ✓  |    |    |    |    | 17 (81.0) |         |
| BSc Nursing                              |    |    |    |    |    |    |    |    |    |    |    |    |    |    |    |    |    | ✓  |    |    | ✓  | 2 (9.5)   |         |
| BSc Pharmacy                             |    |    |    |    |    |    |    |    |    |    |    |    |    |    |    |    |    |    | ✓  |    |    | 1 (4.8)   |         |
| Graduate (i.e. non-medical degree)       |    |    |    |    |    |    |    |    |    |    |    |    |    |    |    |    |    |    |    | ✓  |    | 1 (4.8)   |         |
| <b>Official position</b>                 |    |    |    |    |    |    |    |    |    |    |    |    |    |    |    |    |    |    |    |    |    |           |         |
| Medical Superintendent                   |    |    |    |    |    | ✓  |    |    |    |    |    |    |    |    |    |    |    |    |    |    |    | 1 (4.8)   |         |
| Chief Medical Officer                    |    |    |    |    |    |    |    |    | ✓  |    |    |    |    |    |    |    |    |    |    |    |    | 1 (4.8)   |         |
| Medical Officer                          |    |    |    |    |    |    |    |    |    |    |    | ✓  |    |    |    |    |    |    |    |    |    | 1 (4.8)   |         |
| Consultant                               | ✓  |    | ✓  |    |    |    | ✓  | ✓  |    |    |    |    | ✓  | ✓  | ✓  | ✓  | ✓  |    |    |    |    | 9 (42.9)  |         |
| Surgeon                                  |    | ✓  |    |    |    |    |    |    |    | ✓  |    |    |    |    |    |    |    |    |    |    |    | 2 (9.5)   |         |
| General Medicine                         |    |    |    |    |    |    |    |    |    |    | ✓  |    |    |    |    |    |    |    |    |    |    | 1 (4.8)   |         |
| Intern Doctor                            |    |    |    | ✓  | ✓  |    |    |    |    |    |    |    |    |    |    |    |    |    |    |    |    | 2 (9.5)   |         |
| Ward Nurse                               |    |    |    |    |    |    |    |    |    |    |    |    |    |    |    |    |    | ✓  |    |    | ✓  | 2 (9.5)   |         |
| Pharmacist                               |    |    |    |    |    |    |    |    |    |    |    |    |    |    |    |    |    |    | ✓  |    |    | 1 (4.8)   |         |
| Medical Records Officer                  |    |    |    |    |    |    |    |    |    |    |    |    |    |    |    |    |    |    |    | ✓  |    | 1 (4.8)   |         |
| <b>Years of experience in position</b>   |    |    |    |    |    |    |    |    |    |    |    |    |    |    |    |    |    |    |    |    |    |           |         |
| <1                                       |    | ✓  |    |    | ✓  |    |    |    |    |    |    |    |    |    |    |    |    |    |    |    |    | 2 (9.5)   |         |
| 1 – 3                                    |    |    |    | ✓  |    |    |    |    |    |    |    |    |    |    |    |    |    |    |    |    |    | 1 (4.8)   |         |
| 4 – 6                                    |    |    |    |    |    | ✓  |    | ✓  |    |    |    |    |    |    |    |    |    | ✓  |    | ✓  | ✓  | 5 (23.8)  |         |
| 7 – 10                                   |    |    | ✓  |    |    |    | ✓  |    |    |    |    |    |    |    |    |    |    |    |    | ✓  |    | 3 (14.3)  |         |
| >10                                      | ✓  |    |    |    |    |    |    |    | ✓  | ✓  | ✓  | ✓  | ✓  | ✓  | ✓  | ✓  | ✓  |    |    |    |    | 10 (47.6) |         |
| <b>Place of work</b>                     |    |    |    |    |    |    |    |    |    |    |    |    |    |    |    |    |    |    |    |    |    |           |         |
| General Hospital                         |    | ✓  | ✓  | ✓  | ✓  |    |    |    |    |    |    |    |    | ✓  |    | ✓  | ✓  | ✓  | ✓  |    |    | 9 (42.9)  |         |
| Regional Hospital                        | ✓  |    |    |    |    |    |    |    | ✓  | ✓  | ✓  |    | ✓  |    |    |    |    |    |    |    | ✓  | 7 (33.3)  |         |
| Taluk Hospital                           |    |    |    |    |    | ✓  | ✓  | ✓  |    |    |    | ✓  |    |    | ✓  |    |    |    |    |    |    | 5 (23.8)  |         |
| <b>Language(s) used during interview</b> |    |    |    |    |    |    |    |    |    |    |    |    |    |    |    |    |    |    |    |    |    |           |         |
| English (only)                           |    | ✓  | ✓  | ✓  | ✓  | ✓  | ✓  | ✓  | ✓  | ✓  | ✓  | ✓  | ✓  | ✓  | ✓  | ✓  | ✓  |    |    |    |    | 15 (71.4) |         |
| Hindi (only)                             |    |    |    |    |    |    |    |    |    |    |    |    |    |    |    |    |    |    |    |    | ✓  | ✓         | 2 (9.5) |
| Malayalam (only)                         |    |    |    |    |    |    |    |    |    |    |    |    |    |    |    |    |    | ✓  | ✓  |    |    | 2 (9.5)   |         |
| English & Hindi (mixture)                | ✓  |    |    |    |    |    |    |    |    |    |    | ✓  |    |    |    |    |    |    |    |    |    | 2 (9.5)   |         |

\* HCPs could select more than one answer for this question

### 3.3 Charted Data

During analysis of patient and HCP data, three themes (with subcategories) emerged for each participant group. Patient themes were 1.Public healthcare service characteristics, 2. HCP to patient communication and 3.Attitudes regarding medical information (Table 3). HCP themes were 1.System factors, 2.Information exchange practices and 3.Quality improvement strategies (Table 4).

Following separate analysis of patient and HCP data, the results of both participant groups were compared to assess similarities and differences between their reports of knowledge, attitudes and barriers to handover communication. The results of this comparison are displayed in Figure 1 (see supplementary file "S5").The similarities will be described first, followed by the differences. To ensure confidentiality, numerical pseudonyms have been used when presenting quotes.

Table 3. Summary of charted data for inpatients (IPs)

| IP | Public healthcare service characteristics |                                 | HCP to patient communication                     |                      |                          | Attitudes regarding medical information |                                   |                                       |
|----|-------------------------------------------|---------------------------------|--------------------------------------------------|----------------------|--------------------------|-----------------------------------------|-----------------------------------|---------------------------------------|
|    | Large patient loads (overcrowding)        | Deficient primary care services | Verbal healthcare information (during admission) | Referral information | Impoliteness/ impatience | Transportation of medical documents     | Patient-held booklet intervention | Dissatisfaction with lifestyle advice |
| 1  |                                           |                                 |                                                  |                      |                          | ✓                                       |                                   |                                       |
| 2  |                                           |                                 | ✓                                                |                      |                          |                                         |                                   |                                       |
| 3  | ✓                                         |                                 | ✓                                                |                      | ✓                        | ✓                                       |                                   |                                       |
| 4  |                                           |                                 | ✓                                                |                      |                          | ✓                                       |                                   |                                       |
| 5  |                                           | ✓                               | ✓                                                | ✓                    | ✓                        |                                         |                                   |                                       |
| 6  |                                           |                                 |                                                  | ✓                    |                          | ✓                                       |                                   |                                       |
| 7  | ✓                                         | ✓                               |                                                  | ✓                    |                          | ✓                                       |                                   |                                       |
| 8  |                                           |                                 |                                                  | ✓                    |                          |                                         |                                   |                                       |
| 9  |                                           |                                 | ✓                                                |                      |                          |                                         |                                   |                                       |
| 10 |                                           |                                 | ✓                                                |                      |                          |                                         |                                   |                                       |
| 11 | ✓                                         |                                 | ✓                                                |                      |                          | ✓                                       |                                   |                                       |
| 12 |                                           |                                 | ✓                                                | ✓                    |                          | ✓                                       |                                   |                                       |
| 13 |                                           |                                 | ✓                                                |                      |                          | ✓                                       |                                   |                                       |
| 14 |                                           | ✓                               | ✓                                                |                      |                          |                                         | ✓                                 | ✓                                     |
| 15 |                                           | ✓                               | ✓                                                |                      | ✓                        |                                         | ✓                                 | ✓                                     |
| 16 |                                           | ✓                               | ✓                                                |                      |                          | ✓                                       | ✓                                 |                                       |
| 17 |                                           |                                 | ✓                                                |                      |                          | ✓                                       | ✓                                 | ✓                                     |
| 18 |                                           | ✓                               | ✓                                                |                      |                          | ✓                                       | ✓                                 |                                       |
| 19 |                                           |                                 | ✓                                                |                      |                          | ✓                                       | ✓                                 |                                       |
| 20 |                                           |                                 | ✓                                                |                      |                          |                                         | ✓                                 | ✓                                     |

Table 4. Summary of charted data for healthcare professionals (HCPs)

| HCP | System factors              |                                            |                                                                     | Information exchange practices |                    |                                |                        | Quality improvement strategies          |                             |                                   |                              |                                   |
|-----|-----------------------------|--------------------------------------------|---------------------------------------------------------------------|--------------------------------|--------------------|--------------------------------|------------------------|-----------------------------------------|-----------------------------|-----------------------------------|------------------------------|-----------------------------------|
|     | Time & resource constraints | Absence of handover communication training | Absence of structured formats for information exchange between HCPs | Hospital record keeping        | Ad-hoc phone calls | Patient-held medical documents | Discharge instructions | Hierarchical transfer of responsibility | Increase resource provision | Introduce formal referral systems | Implement "e-health" systems | Patient-held booklet intervention |
| 1   |                             |                                            | ✓                                                                   |                                |                    | ✓                              | ✓                      |                                         | ✓                           |                                   |                              |                                   |
| 2   |                             |                                            | ✓                                                                   |                                |                    | ✓                              | ✓                      |                                         |                             |                                   |                              |                                   |
| 3   |                             |                                            |                                                                     |                                |                    | ✓                              |                        |                                         | ✓                           | ✓                                 | ✓                            |                                   |
| 4   | ✓                           |                                            | ✓                                                                   |                                |                    | ✓                              | ✓                      |                                         |                             |                                   |                              |                                   |
| 5   |                             |                                            | ✓                                                                   | ✓                              |                    | ✓                              |                        |                                         |                             |                                   |                              |                                   |
| 6   | ✓                           |                                            | ✓                                                                   |                                |                    |                                |                        |                                         | ✓                           |                                   | ✓                            |                                   |
| 7   | ✓                           |                                            | ✓                                                                   |                                | ✓                  |                                |                        |                                         |                             |                                   |                              |                                   |
| 8   | ✓                           |                                            |                                                                     |                                | ✓                  |                                |                        |                                         |                             |                                   |                              |                                   |
| 9   |                             |                                            |                                                                     |                                |                    |                                |                        |                                         | ✓                           |                                   |                              |                                   |
| 11  | ✓                           | ✓                                          | ✓                                                                   |                                | ✓                  |                                | ✓                      |                                         |                             |                                   |                              |                                   |
| 14  | ✓                           | ✓                                          | ✓                                                                   |                                |                    |                                |                        |                                         | ✓                           | ✓                                 |                              |                                   |
| 15  |                             |                                            |                                                                     | ✓                              |                    | ✓                              |                        |                                         | ✓                           |                                   | ✓                            |                                   |
| 18  | ✓                           |                                            |                                                                     |                                |                    |                                |                        |                                         |                             |                                   | ✓                            | ✓                                 |
| 19  | ✓                           |                                            |                                                                     |                                |                    |                                |                        |                                         |                             |                                   |                              | ✓                                 |
| 20  | ✓                           |                                            |                                                                     |                                |                    | ✓                              |                        |                                         |                             |                                   |                              | ✓                                 |
| 21  |                             |                                            |                                                                     |                                |                    |                                |                        |                                         |                             |                                   |                              | ✓                                 |
| 22  | ✓                           |                                            |                                                                     |                                |                    |                                |                        | ✓                                       |                             |                                   |                              | ✓                                 |
| 23  |                             |                                            |                                                                     | ✓                              |                    | ✓                              | ✓                      | ✓                                       |                             |                                   |                              |                                   |
| 24  | ✓                           |                                            |                                                                     | ✓                              |                    |                                |                        |                                         |                             |                                   |                              |                                   |
| 25  |                             |                                            |                                                                     | ✓                              |                    |                                |                        |                                         |                             |                                   |                              |                                   |
| 26  | ✓                           |                                            |                                                                     |                                |                    |                                |                        | ✓                                       |                             |                                   |                              |                                   |

## 3.4 Overlapping content

### 3.4.1 Public healthcare constraints

During interviews, a number of patients reported that they chose to visit public hospitals because of the better availability of healthcare staff compared to local healthcare facilities, such as smaller hospitals and primary/community health centres:

*"We have very limited time, we did go to local hospital but doctors are not there. So if we get time we will come here rather than going to a hospital where there are no doctors. (IP 15)"*

However, multiple patients also reported that government hospitals were often crowded with high daily patient loads:

*"There is so much crowd there you can't ask or hear anything there... so many people are there now, you cannot do anything. (IP 11)"*

The human resource issues at government primary and community healthcare facilities were also mentioned by HCPs:

*"It will be useful if availability of doctors is ensured at the peripheral institutions around the clock. At times it is not there. (DOC 1)"*

Additionally, in our study settings most hospital doctors worked in both outpatient clinics and inpatient wards on a daily basis. Many doctors expressed concerns of time pressures due to the large patient volumes seen at hospital outpatient clinics and the subsequent lack of time they had to attend to all patients:

1  
2  
3 378 *“We can hardly spend five minutes with each patient, seeing the crowd you will*  
4  
5 379 *just want to finish everyone soon. (DOC 7)”*  
6  
7

8 380 Some doctors also reported that human and medical resource constraints across  
9  
10 381 public healthcare facilities were hindering quality of care:

11  
12  
13 382 *“[It’s] not [about] motivation, [it’s about] resource limitation. It’s not humanly*  
14  
15 383 *possible to see people every day for seven days. Quality definitely gets*  
16  
17 384 *compromised. (DOC 3)”*  
18  
19

20  
21 385  
22  
23

### 24 386 **3.4.2 Referral communication**

25  
26  
27 387 A number of patients who recalled being referred from a previous healthcare facility  
28  
29 388 to the hospital reported that they were not provided with any referral information:

30  
31  
32 389 *“No, they didn’t give any parchi [papers]. We were getting medicines right only*  
33  
34 390 *that is with us. (IP 8)”*  
35  
36

37  
38 391 HCPs also discussed referral communication. Doctors explained that there were no  
39  
40 392 structured processes to follow for information exchange during referrals:

41  
42  
43 393 *“Yeah there is no proper way of doing it... inpatients sometimes we have to*  
44  
45 394 *[refer] but as I told you we never had a structured format. (DOC 14)”*  
46  
47

48  
49 395 However, despite a lack of structured systems, some doctors described making ad-  
50  
51 396 hoc calls to ensure that some information was transferred when referring a patient:

52  
53  
54 397 *“Sometimes I call the doctor to tell them that so and so is coming. Please do*  
55  
56 398 *the needful. If I know the patient or doctor. (DOC 11)”*  
57  
58

59 399  
60

### 3.4.3 Patient-held medical information

At the point of hospital admission, patient-held notes and/or medical records can facilitate optimal care by providing HCPs with key patient-specific information. When asked about whether they brought medical papers to the hospital, most patients reported that they regularly stored and transported papers to HCP visits; these included referral notes, prescription cards, test results and other records from inpatient/outpatient/primary care:

*“Yeah we have always kept everything safely. [Shows researcher a bag with all sort of papers like reports, lab tests, etc.] (IP 3)”*

Doctors also talked about patient-held medical information during interviews. For example, some doctors reported that patients regularly kept and transported their medical records:

*“Almost everyone comes with medical reports. (DOC 11)”*

However, other doctors described that, in their experience, the availability of patient-held records was less consistent and that this could negatively impact continuity of care:

*“Some of them do bring investigations and all others don’t bring much and we have to work out what happened from the start. (DOC 3)”*

### 3.4.4 Healthcare management communication

When asked about verbal HCP communication, many patients reported that during admission and/or discharge a HCP had provided them with some basic verbal



1  
2  
3 422 healthcare management information (i.e. medication, treatment, lifestyle and/or  
4  
5 423 follow-up requirements). However, the quantity of information received appeared to  
6  
7 424 vary notably between patients. For example, some recalled being given detailed  
8  
9 425 instructions:

10  
11  
12  
13 426 *“Doctor says everything. I was given medicines and now they asked me to*  
14  
15 427 *take injections also. Doctor is saying I am not controlling my sugar. The nurse*  
16  
17 428 *taught me how to take injection. (IP 19)”*

19  
20 429 Conversely, others appeared to receive relatively limited information and one carer  
21  
22 430 reported having to seek healthcare advice from alternative sources:

23  
24  
25  
26 431 *“Doctors don’t explain everything. We speak to our friends and get details*  
27  
28 432 *from them. (Carer - IP 16)”*

29  
30 433 HCPs also discussed their healthcare communication practices with inpatients.

31  
32 434 Whilst talking about discharge, a nurse described the usual amount of time taken to  
33  
34 435 explain information to each patient:

35  
36  
37  
38 436 *“Usually we take 20-25 minutes to instruct the patients. If the patients*  
39  
40 437 *understand then it can be even faster. (NUR 1)”*

41  
42  
43  
44 438 Doctors reported that they provided patients with documented information on  
45  
46 439 discharge cards and verbally advised inpatients to return to their local  
47  
48 440 HCP/healthcare institution during the discharge consultation:

49  
50  
51 441 *“We give them a discharge card. Discharge card is there we have written and*  
52  
53 442 *then we refer them to the local hospital or where they come from. (DOC 15)”*

54  
55  
56  
57 443

### 3.4.5 Booklet intervention

During interviews that took place after the handover expert meeting, patients were asked for their opinion regarding the utility of a patient-held booklet where records could be stored and transported to HCP visits. Most appeared to think that it might be effective and could help with self-management, including those who were illiterate:

*"Yeah, sometimes we don't know what to do so it would be good if some paper is there to help us. We can't read it ourselves but our son or daughter-in-law can help us. (IP 17)"*

HCPs were also asked for their opinions regarding the booklet intervention. Many generally felt it could be useful, but various conditions and/or reservations were also expressed. For example, doctors felt that the success of the booklet would rely on patient attitudes:

*"That will depend on the patients, if they maintain that and bring it every time. For us there is no change, we write our observations in paper or notebook, doesn't matter... Might be helpful. (DOC 22)"*

Related to this, one doctor felt that to see the most benefit, patients needed to be regularly instructed to keep and transport their medical documents:

*"We write the communication but the patients don't keep them proper. I think we have to tell the patients to keep the letters and papers. (DOC 4)"*

## 3.5 Content unique to patients

### 3.5.1 Attitudes regarding HCP communication during admission

A few patients recalled receiving some unfavourable/impolite treatment from healthcare staff during their hospital admission:

*“The doctor’s don’t speak much. They explain but get angry if you don’t understand them. (IP 3)”*

In addition, some patients expressed dissatisfaction with the lifestyle advice provided. In particular, patients of lower socio-economic status felt that nutritional instructions were not suitable for them due to their time and financial constraints:

*“We are daily labourers we can’t follow all the instructions... We can’t follow that, we are poor we do hard work and we just can’t concentrate on eating. Whatever is there we just eat. (IP 15)”*

## 3.6 Content unique to HCPs

### 3.6.1 Institutional/systemic factors

Some doctors displayed good knowledge of the key information should be transferred during patient referrals/transfers and/or hospital discharge.

*“To another hospital, yeah first we have to write what are the main complaints of patients presenting illness and write about the past history, then we will write about what all investigations we have done here ‘til the day of transfer, then what is the condition of the patient we are discharging, why we are*

1  
2  
3 487 *discharging (and) any investigations, major investigations, to be done. (DOC*  
4  
5 488 *2)”*  
6  
7

8  
9 489 However, when asked about training opportunities numerous doctors mentioned that  
10  
11 490 they had not received any formal handover training. Some recalled that this type of  
12  
13 491 training was not provided at medical school:

14  
15  
16 492 *“I think it was not there in medical curriculum. (IP 1)”*  
17

18  
19 493 Others reported that training was not provided in their workplace/s and instead they  
20  
21 494 learned on the job:

22  
23  
24 495 *“We are sent to the wards, we see what our seniors do and we do that’s all.*

25  
26 496 *We have to develop our communication skills ourselves no formal training is*  
27  
28  
29 497 *there. (DOC 14)”*  
30

31  
32 498 When asked about hospital record keeping, a medical records officer stated that  
33  
34 499 inpatient records are stored in hospitals following patient discharge for up to ten  
35  
36 500 years. However, the same officer also indicated that these paper-based records are  
37  
38 501 not easily accessible:

39  
40  
41 502 *“Definitely I can locate any record but it might take some time to locate them.*  
42  
43  
44 503 *(MRO 1)”*  
45

46  
47 504

### 50 505 **3.6.2 Organisational culture**

51  
52  
53 506 Based on reports from both doctors and nurses, it appeared as though some  
54  
55 507 hierarchical transfer of responsibility for documented handover communication took  
56  
57 508 place in hospitals. For example, a senior doctor mentioned that they instructed  
58  
59 509 medical interns to write notes for them when their patient load was high:  
60

1  
2  
3 510 *"We do write in the papers, whether it's discharge card or outpatient sheets.*  
4  
5 511 *When patient load is high, then we tell our interns to do it for us, we check that*  
6  
7  
8 512 *and then sign. (DOC 22)"*  
9

10  
11 513

### 14 514 **3.6.3 Requirements for improving information exchange**

17 515 During interviews, HCPs were asked for their thoughts on requirements to improve  
18  
19 516 information exchange between HCPs and between HCPs and patients. Numerous  
20  
21  
22 517 doctors felt that there needed to be a notable increase in public healthcare resource  
23  
24 518 provision:

27 519 *"Infrastructure is very small but the outpatient department is ten times more*  
28  
29 520 *than it can manage, so more posts should be created... We have to increase*  
30  
31 521 *the manpower and also our materials. (DOC 15)"*  
32

34 522 In addition, doctors discussed the idea of introducing structured referral documents  
35  
36 523 and systems to improve referral communication:

39 524 *"You can supply people with [referral] forms and make it mandatory that*  
40  
41  
42 525 *residents have to maintain a register. In that case they will maintain the*  
43  
44 526 *register. (DOC 3)"*  
45

47 527 Whilst discussing current information systems one doctor in Kerala reported that an  
48  
49 528 application had been made for a near-future transition to computerised healthcare  
50  
51  
52 529 information systems. This appeared to be a state-wide plan for public healthcare  
53  
54 530 facilities:

57 531 *"We have submitted a proposal for paperless computerisation system for*  
58  
59 532 *doctors, so I think state-wide they are planning to do that. (DOC 6)"*  
60

## 4. DISCUSSION

### 4.1 Main findings

This study presents qualitative data on patient and HCP knowledge, attitudes and barriers to handover and healthcare communication during public hospital inpatient care in Kerala and Himachal Pradesh states, India. The main findings are that verbal and documented information exchange between HCPs and between HCPs and patients is often suboptimal during referrals/transfers, hospital admission and discharge, with a lack of structured systems and HCP education in place to ensure sufficient continuity of care. Whilst unique themes emerged for both patients and HCPs, comparison of the results showed that there was also a notable amount of overlapping content. The results have highlighted the multifaceted nature of handover and healthcare communication during inpatient care in India. With regard to public health, the findings have also elucidated a number of key areas to address to improve the continuity and safety of chronic NCD patient care.

Some of the results from the current study reflect and reinforce findings from previous research focussing on outpatient care in the same study areas of India.<sup>33</sup> In particular, during interviews in both studies, patients and HCPs recognised the resource constraints affecting public healthcare. The main issue reported was deficient primary healthcare services, which is in line with well-established findings of limited primary care infrastructure across India and numerous LMICs.<sup>34</sup> In our study settings, under-resourced primary care resulted in many patients preferring to visit hospitals as the first point of care. Subsequently, large patient loads were seen in both outpatient and inpatient departments, which limited HCP consultation times. Other key areas of discussion in the currently study reflected in the outpatient

1  
2  
3 557 findings were inconsistent transportation of patient-held medical documents and  
4  
5 558 views regarding the utility of patient-held record booklets. Whilst more inpatients than  
6  
7 559 outpatients reported that they regularly transported records to HCP visits, doctors  
8  
9 560 recalled seeing many who did not bring information to hospital. This was problematic  
10  
11 561 as if patients did not bring their records then doctors had to gather details from  
12  
13 562 scratch, potentially compromising continuity of care. When asked about the possible  
14  
15 563 utility of introducing patient-held record booklets to store and transport documents,  
16  
17 564 inpatients had similar views to outpatients which were generally positive, but also felt  
18  
19 565 that the inclusion of self-management information would be beneficial. Doctors in the  
20  
21 566 current study expressed a wider variety of views, but broadly thought that booklets  
22  
23 567 could be useful if patients had positive attitudes towards their maintenance and use.  
24  
25  
26  
27  
28

29 568       Regarding referral communication, the current study also highlighted similar  
30  
31 569 issues of deficient information exchange observed in the previous outpatient study.<sup>33</sup>  
32  
33 570 For example, reports from HCPs and inpatients revealed that that documented  
34  
35 571 information was often provided in the form of minimal, hand-written notes on papers  
36  
37 572 provided for other purposes (e.g. prescription cards). These findings reflect results  
38  
39 573 from other LMIC studies that have evidenced the exchange of poor-quality referral  
40  
41 574 documents.<sup>35-37</sup> However, the current study also evidenced inpatient reports of not  
42  
43 575 being provided with any documented information during referrals. Further, whilst a  
44  
45 576 small number of inpatient HCPs in the current study explained that they called HCPs  
46  
47 577 to discuss a referral case, it was revealed that this was dependent on how well they  
48  
49 578 knew the patient and/or HCP. Such findings indicate that there are further  
50  
51 579 inconsistencies in referral communication practices than previously described.  
52  
53 580 Overall, such deficits are unsurprising given that multiple HCPs in both the current  
54  
55 581 and previous outpatient study reported an absence of structured systems and  
56  
57  
58  
59  
60

1  
2  
3 582 education provided for handover communication. These findings are also in line with  
4  
5 583 the few previous descriptions from India of an absence of training and protocols for  
6  
7  
8 584 handover practices.<sup>14-16</sup>  
9

10 585 In addition to similarities found with previous research, the current study has  
11  
12 586 elucidated numerous novel insights regarding handover and healthcare  
13  
14 587 communication during critical points in inpatient care, which were previously  
15  
16  
17 588 unexplored in the study areas of India. Regarding inpatient medical record keeping,  
18  
19 589 a records officer reported that hospital records were not easily accessible and rarely  
20  
21 590 retrieved. This lack of available and accurate medical information, paired with  
22  
23  
24 591 inconsistent transportation of patient-held records, carries notable risks for patient  
25  
26 592 safety. This is because without key patient background and/or treatment details,  
27  
28 593 critical oversights can be made that result in adverse events.<sup>4 5 7</sup> Additionally, there  
29  
30  
31 594 were notable variations in patient reports of the provision of healthcare management  
32  
33 595 information during hospital admission and discharge; whilst some patients reported  
34  
35 596 being given clear self-care instructions, others stated that they sought information  
36  
37 597 from external sources due to the lack of detail provided by hospital HCPs. It appears  
38  
39  
40 598 that the time pressures experienced by HCPs and were a significant contributory  
41  
42 599 factor to inconsistencies in HCP to patient communication, particularly at the point of  
43  
44  
45 600 discharge. During interviews, senior doctors reported often being so busy with high  
46  
47 601 patient loads that they would pass the duty of writing discharge notes to interns or  
48  
49 602 nurses. Additionally, it seemed that more time was spent on verbal discharge  
50  
51 603 communication, with a nurse reporting that they typically took approximately twenty  
52  
53  
54 604 minutes per patient to explain discharge instructions. Such practices may be  
55  
56 605 compromising the retention of key healthcare information, as global literature  
57  
58 606 suggests that patients can struggle to absorb verbal details provided during  
59  
60



1  
2  
3 607 consultations.<sup>38</sup> The potential implications of these findings are significant, given  
4  
5 608 the associations that have been found between deficient discharge communication  
6  
7  
8 609 and an increased likelihood of adverse events.<sup>7-10</sup>  
9

10 610 Other key issues affecting handover and healthcare communication during  
11  
12 611 admission and discharge were mentioned solely by each participant group. For  
13  
14 612 patients, some recalled receiving impolite treatment from hospital doctors during  
15  
16  
17 613 admission. Additionally, a small number of patients were dissatisfied with the take-  
18  
19 614 home nutritional advice provided, as they felt it failed to take into account their socio-  
20  
21 615 economic deprivation. These results may be explained by the reported lack of  
22  
23 616 communication training in medical education, as well as a historic tendency for  
24  
25  
26 617 paternalistic physician conduct in India.<sup>39</sup> In other areas of India and Asia, research  
27  
28 618 on HCP-patient communication has also evidenced asymmetric power balances and  
29  
30 619 patient dissatisfaction during patient consultations.<sup>40</sup> Such findings reveal the need  
31  
32  
33 620 for more patient-centred communication, particularly for poorer patients that make up  
34  
35 621 a significant proportion of public healthcare users. As for HCPs, during interviews  
36  
37 622 many doctors recognised the need for an increase in public healthcare resource  
38  
39 623 provision, as well as structured systems for information exchange. Some also  
40  
41  
42 624 discussed the promise of implementing “e-health” systems, with a doctor in Kerala  
43  
44 625 reporting that public healthcare facilities across the state will be transitioning to  
45  
46 626 computerised systems. Whilst our colleagues from Kerala report that this  
47  
48  
49 627 development is in its early stages, it holds potential as similar systems have  
50  
51 628 advanced the accessibility and quality of healthcare information across the globe.<sup>41 42</sup>  
52  
53  
54 629  
55  
56 630  
57  
58 631  
59  
60

## 4.2 Strengths and limitations

As far as the authors are aware, this is the first study to qualitatively explore factors affecting multiple areas of handover communication for chronic disease inpatients in India. The use of multiple sites and qualitative methodology has revealed a number of key issues that are supported among the HIC and emerging LMIC literature, suggesting likely transferability to other LMIC settings. Additionally, interviews with both patients and HCPs have provided multiple key perspectives regarding critical areas of handover communication for inpatient care. The number of interviews conducted helped to ensure data saturation for both participant groups and study credibility was strengthened via use of multi-analyst triangulation.<sup>31</sup>

The lack of documented inclusion/exclusion rates for participation is a study limitation, as this could not be recorded. In addition, the accuracy of recall of the minority of patients interviewed at home may have been limited by the delay between recruitment and data collection. Recruitment challenges meant that patient participants were predominantly older (i.e. 45yrs+), which limited exploration of younger patient experience; this was, however, largely unsurprising given the study exclusively recruited inpatients with chronic NCDs. The cross-cultural nature of this research may have also resulted in constraints during data collection and analysis, as in-group bias could have affected participants' willingness to openly converse with a non-local researcher.<sup>43</sup> Social desirability bias from the use of individual interviews and participant's awareness that the interviewer was a public health professional may have also affected truthfulness of the data.<sup>44</sup> Despite these challenges, the recurrence of themes indicating data saturation and the finding that our results are supported by existing literature suggests that they had minimal impact.

1  
2  
3  
4  
5  
6  
7  
8  
9  
10  
11  
12  
13  
14  
15  
16  
17  
18  
19  
20  
21  
22  
23  
24  
25  
26  
27  
28  
29  
30  
31  
32  
33  
34  
35  
36  
37  
38  
39  
40  
41  
42  
43  
44  
45  
46  
47  
48  
49  
50  
51  
52  
53  
54  
55  
56  
57  
58  
59  
60

### 657 **4.3 Conclusions and next steps**

658 This study has found that handover communication for chronic NCD inpatients  
659 during referrals/transfers, hospital admission and discharge is often fragmented. The  
660 critical barriers appear to be an absence of structured information exchange systems  
661 and HCP education. There is also a growing recognition of the need for the  
662 government to strengthen primary healthcare infrastructure in line with the  
663 declaration of Alma Alta.<sup>45</sup> This will greatly assist in increasing accessibility of care  
664 and subsequently reducing pressure on hospital services. It will also be required to  
665 address the United Nations sustainable development goals regarding universal  
666 health coverage and reducing premature deaths from NCDs.<sup>46</sup> In addition, the  
667 implementation of structured documentation, systems and training is urgently  
668 required to manage critical care transitions such as referral and discharge. Research  
669 from both HIC and LMIC settings has proven that such interventions can improve  
670 continuity and safety of care.<sup>4 16 35 47</sup> Regarding future steps, during HCP interview it  
671 was reported that public healthcare facilities in Kerala will be transitioning to  
672 computerised “e-health” information systems the Indian government has since  
673 pledged to digitise all public healthcare information systems via an “Integrated Health  
674 Information Platform”.<sup>48</sup> Whilst such developments hold promise and are making  
675 progress in Kerala, they remain in their initial stages in many states and face  
676 numerous technological challenges. Additionally, they are not likely to target issues  
677 regarding HCP to patient communication, patient access to healthcare information  
678 and information exchange between public and private providers.

1  
2  
3 679 Therefore, a mixed-methods pilot study exploring the design and  
4  
5 680 implementation of patient-held record booklets is suggested. This could ameliorate  
6  
7 681 some of the current issues by incorporating disease-specific and structured  
8  
9 682 documents, which have been shown to improve recording of clinical information,<sup>47 49</sup>  
10  
11 683 <sup>50</sup> and providing a means of organising records in a logical and accessible way. The  
12  
13 684 patient-held nature of this strategy would increase patient access to key healthcare  
14  
15 685 information, which may improve self-management. Given the unstructured,  
16  
17 686 predominantly paper-based systems utilised across the study sites, this is an area  
18  
19 687 for development that has been welcomed by Indian national and international  
20  
21 688 experts, as well as patients and HCPs in our study areas. There have also been  
22  
23 689 multiple international successes of improved continuity of care via utilisation of  
24  
25 690 similar patient-held/home-based records in outpatient care and maternal and child  
26  
27 691 health.<sup>23-27 51</sup> In order to maximise booklet utilisation, it would be necessary to  
28  
29 692 address the issues surrounding patient retention and understanding of the  
30  
31 693 importance of medical documents. Initial key steps could be to involve both patients  
32  
33 694 and HCPs in the design process and accompany the introduction of booklets with  
34  
35 695 relevant promotion, training and incentives.  
36  
37  
38  
39  
40  
41  
42

43 696 Finally, given the rising burden of NCDs across LMICs, this research is timely  
44  
45 697 and crucial for effective health systems development. It is important that further LMIC  
46  
47 698 research is conducted to explore critical factors affecting quality, continuity and  
48  
49 699 safety of care and to develop sustainable and cost-effective interventions.  
50  
51  
52

53 700

54  
55 701

56  
57  
58 702  
59  
60

## 703 **ACKNOWLEDGEMENTS**

704 This research was supported by the National Institute for Health Research  
705 (NIHR) Collaboration for Leadership in Applied Health Research and Care West  
706 Midlands (NIHR CLAHRC WM). We would like to extend our thanks to all patients,  
707 healthcare staff and researchers who kindly took the time to participate in this  
708 project. We are also indebted and give thanks to the participating hospitals and  
709 community healthcare facilities. Finally, we are very grateful to the Directors of  
710 Health from both Himachal Pradesh and Kerala States, India, for their assistance in  
711 facilitating this project. Without their support this research would not have been  
712 possible.

713

714

## 715 **AUTHOR CONTRIBUTIONS**

716 In order of the authors list: CH: Data curation, formal analysis, visualisation,  
717 writing (both original draft and final review and editing). SJ: Investigation, data  
718 curation, project administration, writing (review and editing). JP: Conceptualisation,  
719 funding acquisition, project administration, supervision, writing (review and editing).  
720 SS: Funding acquisition, project administration, supervision, writing (review and  
721 editing). SG(oenka): Funding acquisition, projection administration, supervision,  
722 writing (review and editing). PD: Conceptualisation, funding acquisition, project  
723 administration, supervision, writing (review and editing). PG: Conceptualisation, data  
724 curation, funding acquisition, writing (review and editing). SG(reenfield): Funding  
725 acquisition, formal analysis, writing (review an editing). RL: Conceptualisation,

1  
2  
3 726 funding acquisition, writing (review and editing). SMH: Conceptualisation, funding  
4  
5 727 acquisition, investigation, methodology, project administration, supervision, writing  
6  
7  
8 728 (review and editing).  
9

10 729

11 730

## 12 13 14 15 16 17 731 **FUNDING STATEMENT**

18  
19  
20  
21 732 This research was joint-funded by the Department of International  
22  
23 733 Development, the Economic and Social Research Council, the Medical Research  
24  
25 734 Council and the Wellcome Trust - grant number: MR/M00287X/1. The funders had  
26  
27  
28 735 no role in study design, conduct or reporting.  
29

30 736

31 737

## 32 33 34 35 36 37 738 **COMPETING INTERESTS STATEMENT**

38  
39  
40 739 The authors of this manuscript have no competing interests to disclose.  
41  
42

43 740

44 741

## 45 46 47 48 49 50 51 52 742 **ETHICS APPROVAL**

53  
54  
55  
56 743 This study was reviewed and approved by the Centre for Chronic Disease  
57  
58 744 Control Independent Ethics Committee, India, and the Amrita Institute of Medical  
59  
60

1  
2  
3 745 Sciences Institutional Ethics Committee, India. Data archives will be stored at the  
4  
5 746 University of Birmingham, in accordance with the University's code of practice.  
6  
7  
8  
9 747  
10  
11 748  
12  
13

## 14 749 **DATA SHARING STATEMENT**

17  
18 750 Deidentified participant transcript data generated and analysed during the  
19  
20  
21 751 current study are available from the corresponding author on reasonable request.  
22  
23

24 752 Contact Details: Dr. Semira Manaseki-Holland, s.manasekiholland@bham.ac.uk.  
25  
26  
27 753  
28  
29  
30 754  
31  
32  
33 755  
34  
35  
36 756  
37  
38  
39 757  
40  
41  
42 758  
43  
44  
45 759  
46  
47  
48 760  
49  
50  
51 761  
52  
53  
54 762  
55  
56  
57 763  
58  
59  
60 764

## 765 REFERENCES

- 766 1. Islam SMS, Purnat TD, Phuong NTA, et al. Non-Communicable Diseases (NCDs) in developing  
767 countries: a symposium report. *Globalization and health* 2014;10(1):81.
- 768 2. World Health Organisation. Communication during patient hand-overs. *Patient safety solutions*  
769 2007;1(3):1-4.
- 770 3. British Medical Association. Safe handover: safe patients. *Guidance on clinical handover for*  
771 *clinicians and managers London: BMA* 2004;7:141.
- 772 4. Merten H, van Galen LS, Wagner C. Safe handover. *Bmj* 2017;359:j4328. doi:  
773 <https://dx.doi.org/10.1136/bmj.j4328>
- 774 5. Australian Council for Safety Quality in Health Care. Clinical handover and patient safety:  
775 Literature review report. 2005
- 776 6. Hesselink G, Schoonhoven L, Barach P, et al. Improving patient handovers from hospital to primary  
777 care: a systematic review. *Ann Intern Med* 2012;157(6):417-28. doi:  
778 <https://dx.doi.org/10.7326/0003-4819-157-6-201209180-00006>
- 779 7. Forster AJ, Murff HJ, Peterson JF, et al. The incidence and severity of adverse events affecting  
780 patients after discharge from the hospital. *Ann Intern Med* 2003;138(3):161-7.
- 781 8. Moore C, Wisnivesky J, Williams S, et al. Medical errors related to discontinuity of care from an  
782 inpatient to an outpatient setting. *J Gen Intern Med* 2003;18(8):646-51.
- 783 9. Li JY, Yong TY, Hakendorf P, et al. Timeliness in discharge summary dissemination is associated  
784 with patients' clinical outcomes. *Journal of evaluation in clinical practice* 2013;19(1):76-79.
- 785 10. van Walraven C, Seth R, Austin PC, et al. Effect of discharge summary availability during post-  
786 discharge visits on hospital readmission. *J Gen Intern Med* 2002;17(3):186-92.
- 787 11. Bradley S, Mott S. Adopting a patient-centred approach: an investigation into the introduction of  
788 bedside handover to three rural hospitals. *J Clin Nurs* 2014;23(13-14):1927-36. doi:  
789 <https://dx.doi.org/10.1111/jocn.12403>
- 790 12. Humphries C MS, Krynicki C, Nandhra K, Novielli N, Amin A, Sheikh A, Saha P, Joseph L,  
791 Gummaraju A, Lilford R, Cheng Y F, Manasek-Holland S. Handover communication in low and  
792 middle-income countries: A systematic review PROSPERO international prospective register  
793 of systematic reviews 2019 [Available from:  
794 [https://www.crd.york.ac.uk/prospero/display\\_record.php?RecordID=9309](https://www.crd.york.ac.uk/prospero/display_record.php?RecordID=9309).
- 795 13. Dreyer R, Viljoen AJ. Evaluation of factors and patterns influencing the 30-day readmission rate  
796 at a tertiary-level hospital in a resource-constrained setting in Cape Town, South Africa.  
797 *South African Medical Journal Suid-Afrikaanse Tydskrif Vir Geneeskunde* 2019;109(3):164-68.
- 798 14. Kumar PJ, V.; Vij, A.; Gupta, S K. . Who is more hands on with hand-offs? A comparative study of  
799 clinical handovers among doctors and nurses in a tertiary care center in India. *International*  
800 *Journal of Research Foundation of Hospital & Healthcare Administration* 2015;3(1):33-40.
- 801 15. Kumar P, Jithesh V, Vij A, et al. Need for a hands-on approach to hand-offs: A study of nursing  
802 handovers in an Indian Neurosciences Center. *Asian journal of neurosurgery* 2016;11(1):54.
- 803 16. Rajavelu P, Rajagopalan A. Pre-formatted written discharge summary—a step towards quality  
804 assurance in the emergency department. *International journal of emergency medicine*  
805 2008;1(4):321-25.
- 806 17. Humphries C, Jaganathan S, Panniyammakal J, et al. Investigating clinical handover and  
807 healthcare communication for outpatients with chronic disease in India: A mixed-methods  
808 study. *PLoS One* Forthcoming
- 809 18. Marshall MN. Sampling for qualitative research. *Fam Pract* 1996;13(6):522-26.
- 810 19. Palys T. Purposive Sampling. In: Given LM, ed. *The Sage Encyclopedia of Qualitative Research*  
811 *Methods*. Los Angeles: Sage 2008:697-98.
- 812 20. World Health Organisation. Information for Researchers Concerning Informed Decision Making  
813 [Internet ]. Available from:



- 1  
2  
3 814 [http://www.who.int/rpc/research\\_ethics/Process\\_seeking\\_IF\\_printing2.pdf](http://www.who.int/rpc/research_ethics/Process_seeking_IF_printing2.pdf) accessed  
4 815 01/05/18.
- 5 816 21. Seale C. Quality in qualitative research. *Qualitative inquiry* 1999;5(4):465-78.
- 6 817 22. Baker SE, Edwards R, Doidge M. How many qualitative interviews is enough?: Expert voices and  
7 818 early career reflections on sampling and cases in qualitative research. 2012
- 8 819 23. Shah PM, Selwyn BJ, Shah K, et al. Evaluation of the home-based maternal record: a WHO  
9 820 collaborative study. *Bull World Health Organ* 1993;71(5):535-48.
- 10 821 24. Osaki K, Hattori T, Kosen S. The role of home-based records in the establishment of a continuum  
11 822 of care for mothers, newborns, and children in Indonesia. *Glob Health Action* 2013;6:1-12.  
12 823 doi: <https://dx.doi.org/10.3402/gha.v6i0.20429>
- 13 824 25. Turner KE, Fuller S. Patient-held maternal and/or child health records: meeting the information  
14 825 needs of patients and healthcare providers in developing countries? *Online journal of public*  
15 826 *health informatics* 2011;3(2)
- 16 827 26. Takeuchi J, Sakagami Y, Perez RC. The Mother and Child Health handbook in Japan as a health  
17 828 promotion tool: An overview of its history, contents, use, benefits, and global influence.  
18 829 *Global pediatric health* 2016;3:2333794X16649884.
- 19 830 27. Walton S, Bedford H, Dezateux C. Use of personal child health records in the UK: findings from  
20 831 the millennium cohort study. *Bmj* 2006;332(7536):269-70.
- 21 832 28. Spencer L, Ritchie J. Qualitative data analysis for applied policy research. Analyzing qualitative  
22 833 data: Routledge 2002:187-208.
- 23 834 29. Braun V, Clarke V. Using thematic analysis in psychology. *Qualitative research in psychology*  
24 835 2006;3(2):77-101.
- 25 836 30. Corbin JM, Strauss A. Grounded theory research: Procedures, canons, and evaluative criteria.  
26 837 *Qualitative sociology* 1990;13(1):3-21.
- 27 838 31. Lincoln YS, Guba EG. Naturalistic inquiry. Beverley Hills: ca: sage, 1985.
- 28 839 32. Gale NK, Heath G, Cameron E, et al. Using the framework method for the analysis of qualitative  
29 840 data in multi-disciplinary health research. *BMC medical research methodology*  
30 841 2013;13(1):117.
- 31 842 33. Humphries C, Jaganathan S, Panniyammakal J, et al. Investigating clinical handover and  
32 843 healthcare communication for outpatients with chronic disease in India: A mixed-methods  
33 844 study. *PLoS ONE [Electronic Resource]* 2018;13(12):e0207511.
- 34 845 34. Das J, Hammer J. Quality of primary care in low-income countries: facts and economics. *Annu Rev*  
35 846 *Econ* 2014;6(1):525-53.
- 36 847 35. Janati A, Amini A, Adham D, et al. Assessing the quality of referral letters written by general  
37 848 practitioners: a cross-sectional study in rural Iran. *Cadernos de Saude Publica*  
38 849 2017;33(2):e00043016.
- 39 850 36. Gyedu A, Baah EG, Boakye G, et al. Quality of referrals for elective surgery at a tertiary care  
40 851 hospital in a developing country: an opportunity for improving timely access to and cost-  
41 852 effectiveness of surgical care. *Int J Surg* 2015;15:74-8. doi:  
42 853 <https://dx.doi.org/10.1016/j.ijssu.2015.01.033>
- 43 854 37. Osinaike BO, Esezobor CI, Akinsola OJ. Quality of Referral Letters to the Paediatric Department of  
44 855 a Tertiary Hospital in Nigeria. *Nigerian Quarterly Journal of Hospital Medicine*  
45 856 2013;23(4):273-9.
- 46 857 38. Kessels RP. Patients' memory for medical information. *Journal of the Royal Society of Medicine*  
47 858 2003;96(5):219-22.
- 48 859 39. Ghooi R, Deshpande S. Patients' rights in India: an ethical perspective. *Indian J Med Ethics*  
49 860 2012;9(277):e8.
- 50 861 40. Pun J, Chan EA, Wang S, et al. Health professional-patient communication practices in East Asia:  
51 862 An integrative review of an emerging field of research and practice in Hong Kong, South  
52 863 Korea, Japan, Taiwan, and Mainland China. *Patient education and counseling* 2018

- 1  
2  
3 864 41. Piette JD, Lun KC, Moura LA, Jr., et al. Impacts of e-health on the outcomes of care in low- and  
4 865 middle-income countries: where do we go from here? *Bull World Health Organ*  
5 866 2012;90(5):365-72. doi: <https://dx.doi.org/10.2471/BLT.11.099069>  
6 867 42. Campanella P, Lovato E, Marone C, et al. The impact of electronic health records on healthcare  
7 868 quality: a systematic review and meta-analysis. *Eur J Public Health* 2016;26(1):60-4. doi:  
8 869 <https://dx.doi.org/10.1093/eurpub/ckv122>  
9 870 43. Tajfel H. Social psychology of intergroup relations. *Annual review of psychology* 1982;33(1):1-39.  
10 871 44. Spector P. Social desirability bias. *Encyclopedia of social science research methods* 2004:1045-46.  
11 872 45. World Health Organization. Declaration of Alma-Ata: International Conference on Primary Health  
12 873 Care, Alma-Ata, USSR, 6–12 September 1978. Retrieved February 1978;14:2006.  
13 874 46. United Nations. Sustainable Development Goals. [Internet]. Available from:  
14 875 <https://www.un.org/sustainabledevelopment/sustainable-development-goals/2018>.  
15 876 47. Ramanayake R. Structured printed referral letter (form letter); saves time and improves  
16 877 communication. *Journal of family medicine and primary care* 2013;2(2):145.  
17 878 48. Government of India - Press Information Bureau. Health Ministry launches a new state-of-the art  
18 879 Information Platform to monitor public health surveillance 2018 [Available from:  
19 880 <http://pib.nic.in/PressReleaselframePage.aspx?PRID=1553941> accessed 01/01/2019 2019.  
20 881 49. Doyle M-A, Malcolm JC, Liu D, et al. Using a structured discharge letter template to improve  
21 882 communication during the transition from a specialized outpatient diabetes clinic to a  
22 883 primary care physician. *Canadian journal of diabetes* 2015;39(6):457-66.  
23 884 50. Lilford RJ, Kelly M, Baines A, et al. Effect of using protocols on medical care: randomised trial of  
24 885 three methods of taking an antenatal history. *Bmj* 1992;305(6863):1181-4.  
25 886 51. Ibrahim H, Munkhbayar U, Toivgoos A, et al. Can universal patient-held health booklets promote  
26 887 continuity of care and patient-centred care in low-resource countries? The case of Mongolia.  
27 888 *BMJ Qual Saf* 2019;bmjqs-2018-008941.  
28  
29  
30  
31  
32 889  
33  
34 890  
35  
36  
37  
38  
39  
40  
41  
42  
43  
44  
45  
46  
47  
48  
49  
50  
51  
52  
53  
54  
55  
56  
57  
58  
59  
60

# S1. Additional information regarding the Indian healthcare system

## 1. National context: structure of public healthcare system

The basic structure of the public healthcare system in India is as follows:<sup>1</sup>

- National level: Ministry of Health and Family Welfare.
- State level: State Department of Health and Family welfare in each state.
- Regional level: covers 3 - 5 districts. Headed by State Directorate of Health.
- District level: Middle level management organisation serving as a link between the regional and state structures and the peripheral and PHC structures.
- Sub-divisional/Taluk level: Hospitals/hospitals with specialty care (Taluk headquarters hospitals). Healthcare services are rendered via the office of Assistant District Health and Family Welfare Officer.
- Community level: CHCs that cater for 80,000-120,000 population and PHCs that cover approximately 20,000 – 30,000 population (often upgrades of rural dispensaries).

## 2. Public healthcare across India

The quality of public healthcare across India varies notably between states and between urban and rural areas. Aside from some pockets of excellence in a select few states, the public sector is generally falling short of meeting the basic healthcare needs of the growing population. Some of the main reasons for this include: services being too far away, a lack of trained personnel and supplies, and limited facility

1  
2  
3 opening times that are often unreliable.<sup>2</sup> With regard to primary health centres,  
4  
5 government estimates indicate that 10% are without a doctor, 37% are without a  
6  
7 laboratory technician and 25% are without a pharmacist.<sup>3</sup> Issues with public health  
8  
9 centres are particularly rife within poor communities, where facilities have been  
10  
11 found to be closed more than half the time and lack basic medical supplies. Public  
12  
13 facilities are the often the only source of qualified healthcare professionals in rural  
14  
15 areas, which is where much of the poor live.<sup>2</sup>  
16  
17  
18  
19  
20  
21  
22

### 23 **3. National context: private healthcare**

24  
25 Public healthcare in India has lacked funding over a series of decades, resulting from  
26  
27 a lack of prioritisation from economic planners. Therefore, the increasing prevalence  
28  
29 of chronic, non-communicable diseases alongside unresolved challenges of  
30  
31 infectious diseases has placed more strain on public health systems than what can  
32  
33 feasibly be managed. The private healthcare sector has subsequently proliferated to  
34  
35 meet rising needs, expectations and incomes and surveys indicate that private  
36  
37 healthcare providers now dominate service provision. According to reports, public  
38  
39 facilities provided just 20% of primary and community-level healthcare services, and  
40  
41 40% of hospital visits in 2004-05 (down from 25% and 60% respectively in 1986-  
42  
43 87).<sup>2</sup> At the higher end of the market the private sector has world class facilities that  
44  
45 have grown substantially. As a result, hospital care is now an export sector for  
46  
47 medical tourism that cares for approximately 200,000 foreign patients per year.<sup>4</sup>  
48  
49 However, private healthcare providers are poorly regulated, with uneven quality  
50  
51 across facilities. This is resulting in a large number of private facilities delivering  
52  
53 services without appropriate equipment or expertise. Additionally, although visiting  
54  
55 private providers is preferential for many, it is common for high out-of-pocket costs  
56  
57  
58  
59  
60

1  
2  
3 to be incurred; more than 40% of all private hospital inpatients have to borrow money  
4  
5 or sell assets in order to fund their care.<sup>5</sup> This means that many poorer patients are  
6  
7 unable to access healthcare while others fall into poverty as a result of spending.  
8  
9  
10  
11  
12  
13  
14  
15  
16

## 17 REFERENCES

- 21 1. Care Continuum Alliance, India. India – Health Care System Structure and  
22 Organization. 2009. Available from:  
23 [http://dmaa.pbworks.com/w/page/17960772/India%20-](http://dmaa.pbworks.com/w/page/17960772/India%20-%20Health%20Care%20System%20Structure%20and%20Organization)  
24 [%20Health%20Care%20System%20Structure%20and%20Organization](http://dmaa.pbworks.com/w/page/17960772/India%20-%20Health%20Care%20System%20Structure%20and%20Organization)  
25
- 26 2. Joumard I, Kumar A. Improving health outcomes and health care in India.  
27 Paris: Organisation for Economic Cooperation and Development (OECD)  
28 Working Papers, No. 1184, OECD Publishing. 2015. Available from:  
29 [http://www.oecd-ilibrary.org/economics/improving-health-outcomes-and-](http://www.oecd-ilibrary.org/economics/improving-health-outcomes-and-health-care-in-india_5js7t9ptcr26-en)  
30 [health-care-in-india\\_5js7t9ptcr26-en](http://www.oecd-ilibrary.org/economics/improving-health-outcomes-and-health-care-in-india_5js7t9ptcr26-en)  
31
- 32 3. Ministry of Health and Family Welfare, Government of India. Rural  
33 Health Statistics in India. 2012. Available from:  
34 [https://nrhm.gujarat.gov.in/images/pdf/publications/RHS\\_2012.pdf](https://nrhm.gujarat.gov.in/images/pdf/publications/RHS_2012.pdf)  
35
- 36 4. Lunt N, Smith R, Exworthy M, Green S, Horsfall D, Mannion R. Medical  
37 Tourism: Treatments, Markets and Health System Implications: a  
38 Scoping Review. OECD Publishing. 2010. Available from: Paris  
39 <http://www.oecd.org/els/health-systems/48723982.pdf>  
40
- 41 5. The World Bank - Health, Nutrition, Population Sector Unit India South Asian  
42 Region. Raising the sights: better health systems for India's poor. Available  
43 from: <https://openknowledge.worldbank.org/handle/10986/14080>  
44  
45  
46  
47  
48  
49  
50  
51  
52  
53  
54  
55  
56  
57  
58  
59  
60

## **S2. S1. Additional information regarding the study settings**

### **2.1.1. Study setting - Himachal Pradesh**

Himachal Pradesh is principally a rural state in northern India. It has a population of 6.86 million people and the average literacy rate is 83.3%, which is higher than the national average (74%). However, rates remain notably lower for women compared to men (76.6% vs. 90.8%, respectively).<sup>6</sup> Private HCPs are less prevalent in Himachal Pradesh and public healthcare utilisation remains relatively high.<sup>7</sup> A recent study found that the availability of public health services in the state was deemed adequate as compared to standards of other hill states, but with an unequal distribution of resources across regions.<sup>8</sup>

### **2.1.2 Study setting - Kerala**

Kerala state is in the south-west of India. It has a population of 34.8 million people and a greater than national average urban-based population of 47.7%. It has the highest overall literacy rate in India (93.9%; men 96.1%, women 92.1).<sup>9</sup> There are a relatively large number of government healthcare facilities in Kerala but the healthcare environment is becoming increasingly complex due to a growing presence of private healthcare providers. Despite this, public health facilities in Kerala are generally the first point of care and continue to deliver essential services.<sup>10</sup>

## REFERENCES

6. Government of India. Himachal Pradesh Population Census Data 2011 [Internet]. Available from: <https://www.census2011.co.in/census/state/himachal+pradesh.html> accessed 13/06/18 2017.
7. Government of India. Himachal Pradesh Development Report. New Delhi: Academic Foundation, 2005.
8. Suman.; Bhutani S. Availability of health services in Himachal Pradesh *International Journal of Advanced Research and Development* 2017;2(6):231-38.
9. Government of Kerala. Kerala Population Census Data 2011 [Internet]. Available from: <https://www.census2011.co.in/census/state/kerala.html> accessed 13/06/18.
10. Government of Kerala. Kerala Development Report. New Delhi: Academic Foundation, 2008.

S5. Figure 1. Similarities and differences between the content of IP & HCP data with related sub-categories

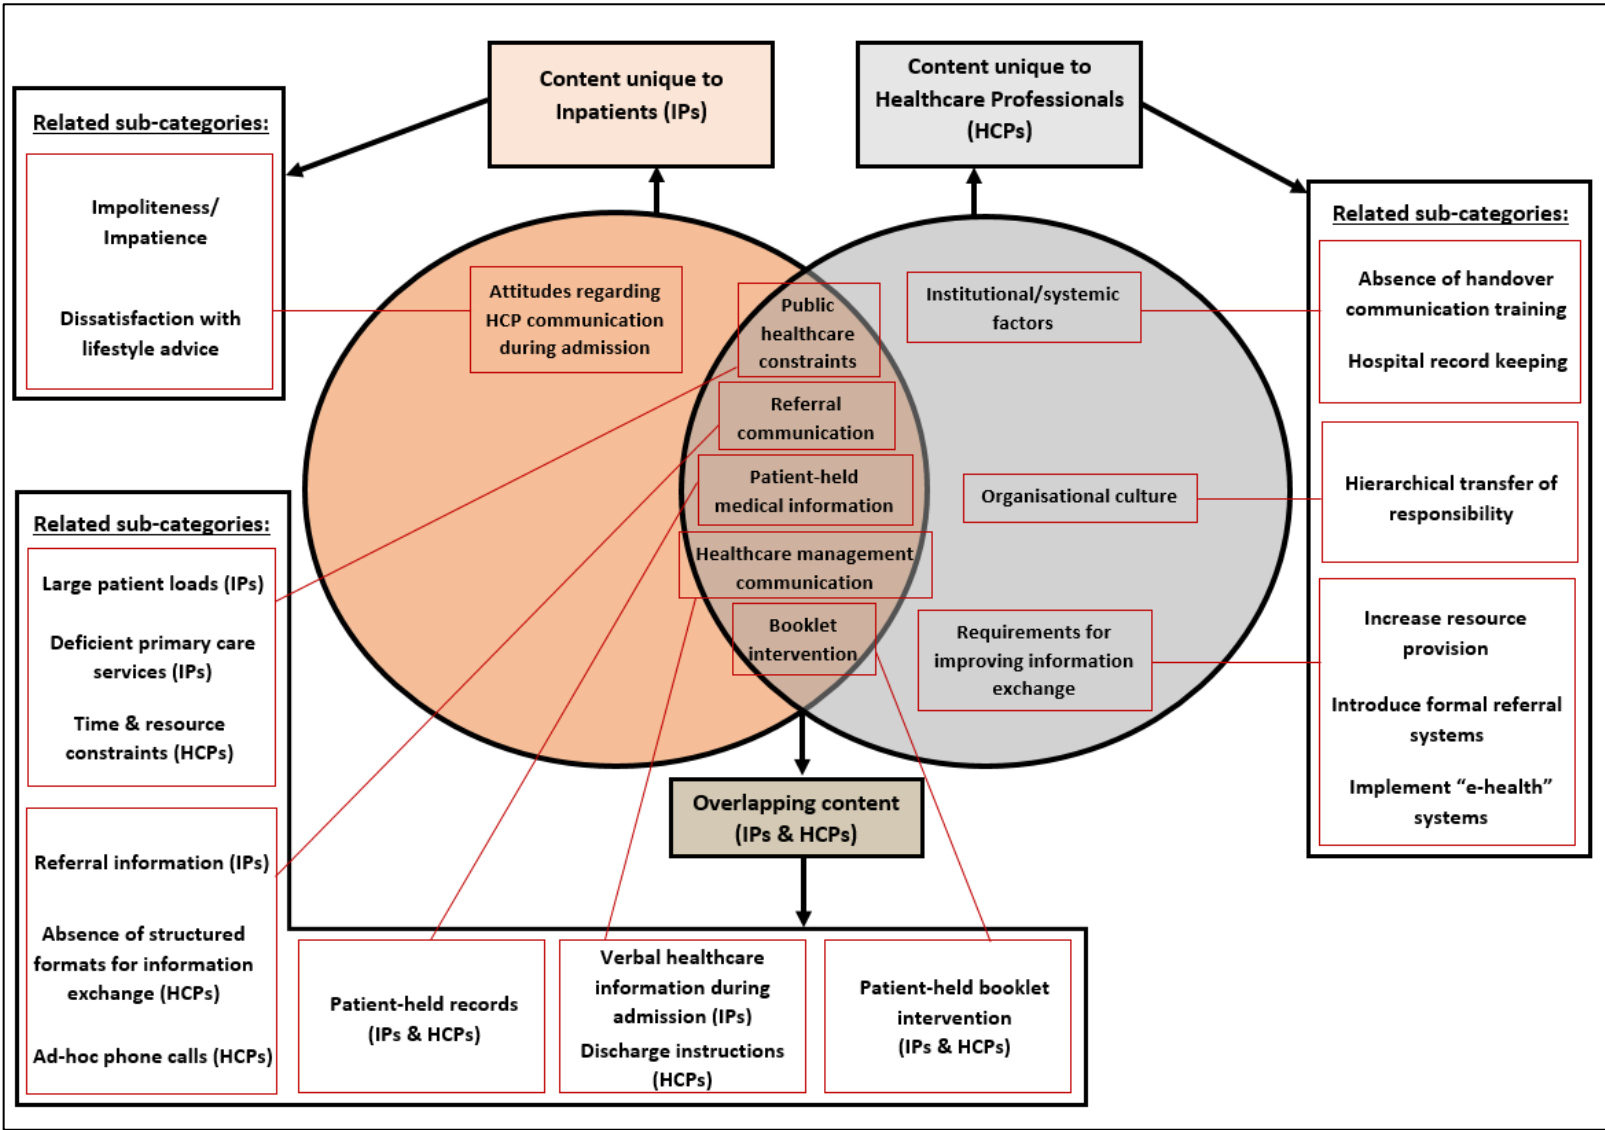



# Reporting checklist for qualitative study.

Based on the SRQR guidelines.

## Instructions to authors

Complete this checklist by entering the page numbers from your manuscript where readers will find each of the items listed below.

Your article may not currently address all the items on the checklist. Please modify your text to include the missing information. If you are certain that an item does not apply, please write "n/a" and provide a short explanation.

Upload your completed checklist as an extra file when you submit to a journal.

In your methods section, say that you used the SRQR reporting guidelines, and cite them as:

O'Brien BC, Harris IB, Beckman TJ, Reed DA, Cook DA. Standards for reporting qualitative research: a synthesis of recommendations. Acad Med. 2014;89(9):1245-1251.

|    | Reporting Item                                                                                                                                                                                                                       | Page Number |
|----|--------------------------------------------------------------------------------------------------------------------------------------------------------------------------------------------------------------------------------------|-------------|
| #1 | Concise description of the nature and topic of the study identifying the study as qualitative or indicating the approach (e.g. ethnography, grounded theory) or data collection methods (e.g. interview, focus group) is recommended | 1           |
| #2 | Summary of the key elements of the study using the abstract format of the intended publication; typically                                                                                                                            | 2-3         |

|    |                       |    |                                                           |      |
|----|-----------------------|----|-----------------------------------------------------------|------|
| 1  |                       |    | includes background, purpose, methods, results and        |      |
| 2  |                       |    |                                                           |      |
| 3  |                       |    | conclusions                                               |      |
| 4  |                       |    |                                                           |      |
| 5  |                       |    |                                                           |      |
| 6  | Problem formulation   | #3 | Description and significance of the problem /             | 5-7  |
| 7  |                       |    |                                                           |      |
| 8  |                       |    | phenomenon studied: review of relevant theory and         |      |
| 9  |                       |    |                                                           |      |
| 10 |                       |    | empirical work; problem statement                         |      |
| 11 |                       |    |                                                           |      |
| 12 |                       |    |                                                           |      |
| 13 | Purpose or research   | #4 | Purpose of the study and specific objectives or           | 6-7  |
| 14 | question              |    | questions                                                 |      |
| 15 |                       |    |                                                           |      |
| 16 |                       |    |                                                           |      |
| 17 |                       |    |                                                           |      |
| 18 |                       |    |                                                           |      |
| 19 | Qualitative approach  | #5 | Qualitative approach (e.g. ethnography, grounded          | 6-12 |
| 20 | and research paradigm |    | theory, case study, phenomenology, narrative research)    |      |
| 21 |                       |    | and guiding theory if appropriate; identifying the        |      |
| 22 |                       |    |                                                           |      |
| 23 |                       |    | research paradigm (e.g. postpositivist, constructivist /  |      |
| 24 |                       |    |                                                           |      |
| 25 |                       |    | interpretivist) is also recommended; rationale. The       |      |
| 26 |                       |    |                                                           |      |
| 27 |                       |    | rationale should briefly discuss the justification for    |      |
| 28 |                       |    |                                                           |      |
| 29 |                       |    | choosing that theory, approach, method or technique       |      |
| 30 |                       |    |                                                           |      |
| 31 |                       |    | rather than other options available; the assumptions      |      |
| 32 |                       |    |                                                           |      |
| 33 |                       |    | and limitations implicit in those choices and how those   |      |
| 34 |                       |    |                                                           |      |
| 35 |                       |    | choices influence study conclusions and transferability.  |      |
| 36 |                       |    |                                                           |      |
| 37 |                       |    | As appropriate the rationale for several items might be   |      |
| 38 |                       |    |                                                           |      |
| 39 |                       |    | discussed together.                                       |      |
| 40 |                       |    |                                                           |      |
| 41 |                       |    |                                                           |      |
| 42 |                       |    |                                                           |      |
| 43 |                       |    |                                                           |      |
| 44 |                       |    |                                                           |      |
| 45 |                       |    |                                                           |      |
| 46 |                       |    |                                                           |      |
| 47 | Researcher            | #6 | Researchers' characteristics that may influence the       | 6-12 |
| 48 | characteristics and   |    | research, including personal attributes, qualifications / |      |
| 49 | reflexivity           |    | experience, relationship with participants, assumptions   |      |
| 50 |                       |    |                                                           |      |
| 51 |                       |    | and / or presuppositions; potential or actual interaction |      |
| 52 |                       |    |                                                           |      |
| 53 |                       |    | between researchers' characteristics and the research     |      |
| 54 |                       |    |                                                           |      |
| 55 |                       |    |                                                           |      |
| 56 |                       |    |                                                           |      |
| 57 |                       |    |                                                           |      |
| 58 |                       |    |                                                           |      |
| 59 |                       |    |                                                           |      |
| 60 |                       |    |                                                           |      |

|    |                           |                                                             |       |
|----|---------------------------|-------------------------------------------------------------|-------|
| 1  |                           | questions, approach, methods, results and / or              |       |
| 2  |                           | transferability                                             |       |
| 3  |                           |                                                             |       |
| 4  |                           |                                                             |       |
| 5  |                           |                                                             |       |
| 6  | Context                   | #7 Setting / site and salient contextual factors; rationale | 7     |
| 7  |                           |                                                             |       |
| 8  |                           |                                                             |       |
| 9  | Sampling strategy         | #8 How and why research participants, documents, or         | 7     |
| 10 |                           | events were selected; criteria for deciding when no         |       |
| 11 |                           | further sampling was necessary (e.g. sampling               |       |
| 12 |                           | saturation); rationale                                      |       |
| 13 |                           |                                                             |       |
| 14 |                           |                                                             |       |
| 15 |                           |                                                             |       |
| 16 |                           |                                                             |       |
| 17 |                           |                                                             |       |
| 18 |                           |                                                             |       |
| 19 | Ethical issues pertaining | #9 Documentation of approval by an appropriate ethics       | 37    |
| 20 | to human subjects         | review board and participant consent, or explanation for    |       |
| 21 |                           | lack thereof; other confidentiality and data security       |       |
| 22 |                           | issues                                                      |       |
| 23 |                           |                                                             |       |
| 24 |                           |                                                             |       |
| 25 |                           |                                                             |       |
| 26 |                           |                                                             |       |
| 27 |                           |                                                             |       |
| 28 |                           |                                                             |       |
| 29 | Data collection methods   | #10 Types of data collected; details of data collection     | 6-12  |
| 30 |                           | procedures including (as appropriate) start and stop        |       |
| 31 |                           | dates of data collection and analysis, iterative process,   |       |
| 32 |                           | triangulation of sources / methods, and modification of     |       |
| 33 |                           | procedures in response to evolving study findings;          |       |
| 34 |                           | rationale                                                   |       |
| 35 |                           |                                                             |       |
| 36 |                           |                                                             |       |
| 37 |                           |                                                             |       |
| 38 |                           |                                                             |       |
| 39 |                           |                                                             |       |
| 40 |                           |                                                             |       |
| 41 |                           |                                                             |       |
| 42 |                           |                                                             |       |
| 43 | Data collection           | #11 Description of instruments (e.g. interview guides,      | 6-12  |
| 44 | instruments and           | questionnaires) and devices (e.g. audio recorders) used     |       |
| 45 | technologies              | for data collection; if / how the instruments(s) changed    |       |
| 46 |                           | over the course of the study                                |       |
| 47 |                           |                                                             |       |
| 48 |                           |                                                             |       |
| 49 |                           |                                                             |       |
| 50 |                           |                                                             |       |
| 51 |                           |                                                             |       |
| 52 |                           |                                                             |       |
| 53 | Units of study            | #12 Number and relevant characteristics of participants,    | 14-17 |
| 54 |                           | documents, or events included in the study; level of        |       |
| 55 |                           | participation (could be reported in results)                |       |
| 56 |                           |                                                             |       |
| 57 |                           |                                                             |       |
| 58 |                           |                                                             |       |
| 59 |                           |                                                             |       |
| 60 |                           |                                                             |       |

|                                                                                                    |                                                                                              |     |                                                                                                                                                                                                                                                                                                          |       |
|----------------------------------------------------------------------------------------------------|----------------------------------------------------------------------------------------------|-----|----------------------------------------------------------------------------------------------------------------------------------------------------------------------------------------------------------------------------------------------------------------------------------------------------------|-------|
| 1<br>2<br>3<br>4<br>5<br>6<br>7<br>8<br>9<br>10<br>11<br>12                                        | Data processing                                                                              | #13 | Methods for processing data prior to and during analysis, including transcription, data entry, data management and security, verification of data integrity, data coding, and anonymisation / deidentification of excerpts                                                                               | 12-13 |
| 13<br>14<br>15<br>16<br>17<br>18<br>19<br>20<br>21<br>22                                           | Data analysis                                                                                | #14 | Process by which inferences, themes, etc. were identified and developed, including the researchers involved in data analysis; usually references a specific paradigm or approach; rationale                                                                                                              | 12-13 |
| 23<br>24<br>25<br>26<br>27<br>28<br>29<br>30                                                       | Techniques to enhance trustworthiness                                                        | #15 | Techniques to enhance trustworthiness and credibility of data analysis (e.g. member checking, audit trail, triangulation); rationale                                                                                                                                                                     | 12-13 |
| 31<br>32<br>33<br>34<br>35<br>36<br>37                                                             | Syntheses and interpretation                                                                 | #16 | Main findings (e.g. interpretations, inferences, and themes); might include development of a theory or model, or integration with prior research or theory                                                                                                                                               | 14-28 |
| 38<br>39<br>40<br>41<br>42<br>43                                                                   | Links to empirical data                                                                      | #17 | Evidence (e.g. quotes, field notes, text excerpts, photographs) to substantiate analytic findings                                                                                                                                                                                                        | 21-28 |
| 44<br>45<br>46<br>47<br>48<br>49<br>50<br>51<br>52<br>53<br>54<br>55<br>56<br>57<br>58<br>59<br>60 | Intergration with prior work, implications, transferability and contribution(s) to the field | #18 | Short summary of main findings; explanation of how findings and conclusions connect to, support, elaborate on, or challenge conclusions of earlier scholarship; discussion of scope of application / generalizability; identification of unique contributions(s) to scholarship in a discipline or field | 29-32 |

|    |                       |     |                                                          |    |
|----|-----------------------|-----|----------------------------------------------------------|----|
| 1  | Limitations           | #19 | Trustworthiness and limitations of findings              | 33 |
| 2  |                       |     |                                                          |    |
| 3  |                       |     |                                                          |    |
| 4  | Conflicts of interest | #20 | Potential sources of influence of perceived influence on | 37 |
| 5  |                       |     | study conduct and conclusions; how these were            |    |
| 6  |                       |     | managed                                                  |    |
| 7  |                       |     |                                                          |    |
| 8  |                       |     |                                                          |    |
| 9  |                       |     |                                                          |    |
| 10 |                       |     |                                                          |    |
| 11 |                       |     |                                                          |    |
| 12 | Funding               | #21 | Sources of funding and other support; role of funders in | 37 |
| 13 |                       |     | data collection, interpretation and reporting            |    |
| 14 |                       |     |                                                          |    |
| 15 |                       |     |                                                          |    |
| 16 |                       |     |                                                          |    |

17 The SRQR checklist is distributed with permission of Wolters Kluwer © 2014 by the Association of  
18 American Medical Colleges. This checklist was completed on 26. November 2018 using  
19 <http://www.goodreports.org/>, a tool made by the [EQUATOR Network](#) in collaboration with [Penelope.ai](#)  
20  
21  
22  
23  
24  
25  
26  
27  
28  
29  
30  
31  
32  
33  
34  
35  
36  
37  
38  
39  
40  
41  
42  
43  
44  
45  
46  
47  
48  
49  
50  
51  
52  
53  
54  
55  
56  
57  
58  
59  
60

# BMJ Open

## Patient and healthcare provider knowledge, attitudes and barriers to handover and healthcare communication during chronic disease inpatient care in India: A qualitative exploratory study

|                                 |                                                                                                                                                                                                                                                                                                                                                                                                                                                                                                                                                                                                                                                                                                                                                      |
|---------------------------------|------------------------------------------------------------------------------------------------------------------------------------------------------------------------------------------------------------------------------------------------------------------------------------------------------------------------------------------------------------------------------------------------------------------------------------------------------------------------------------------------------------------------------------------------------------------------------------------------------------------------------------------------------------------------------------------------------------------------------------------------------|
| Journal:                        | <i>BMJ Open</i>                                                                                                                                                                                                                                                                                                                                                                                                                                                                                                                                                                                                                                                                                                                                      |
| Manuscript ID                   | bmjopen-2018-028199.R2                                                                                                                                                                                                                                                                                                                                                                                                                                                                                                                                                                                                                                                                                                                               |
| Article Type:                   | Original research                                                                                                                                                                                                                                                                                                                                                                                                                                                                                                                                                                                                                                                                                                                                    |
| Date Submitted by the Author:   | 17-Oct-2019                                                                                                                                                                                                                                                                                                                                                                                                                                                                                                                                                                                                                                                                                                                                          |
| Complete List of Authors:       | Humphries, Claire; University of Birmingham, UK, Institute of Applied Health Research<br>Jaganathan, Suganthi ; Centre for Chronic Disease Control<br>Panniyammakal, Jeemon ; Centre for Chronic Disease Control<br>Singh, Sanjeev; Amrita Institute of Medical Sciences and Research Centre; Amrita Institute of Medical Sciences and Research Centre<br>Goenka, Shifalika; Public Health Foundation of India<br>Dorairaj, Prabhakaran ; Centre for Chronic Disease Control<br>Gill, Paramjit ; University of Warwick<br>Greenfield, Sheila; University of Birmingham, Primary Care Clinical Sciences<br>Lilford, Richard; University of Warwick, Division of Health and Population Sciences<br>Manaseki-Holland, Semira; University of Birmingham, |
| <b>Primary Subject Heading</b>: | Public health                                                                                                                                                                                                                                                                                                                                                                                                                                                                                                                                                                                                                                                                                                                                        |
| Secondary Subject Heading:      | Health services research, Qualitative research                                                                                                                                                                                                                                                                                                                                                                                                                                                                                                                                                                                                                                                                                                       |
| Keywords:                       | International health services < HEALTH SERVICES ADMINISTRATION & MANAGEMENT, Quality in health care < HEALTH SERVICES ADMINISTRATION & MANAGEMENT, PUBLIC HEALTH, QUALITATIVE RESEARCH                                                                                                                                                                                                                                                                                                                                                                                                                                                                                                                                                               |
|                                 |                                                                                                                                                                                                                                                                                                                                                                                                                                                                                                                                                                                                                                                                                                                                                      |

SCHOLARONE™  
Manuscripts

1  
2  
3  
4 1 **Patient and healthcare provider knowledge,**  
5  
6  
7 2 **attitudes and barriers to handover and healthcare**  
8  
9  
10 3 **communication during chronic disease inpatient**  
11  
12  
13 4 **care in India: A qualitative exploratory study**  
14  
15  
16  
17  
18 5

19  
20  
21 6 Claire Humphries<sup>1¶</sup>, Suganthi Jaganathan<sup>2,3¶</sup>, Jeemon Panniyammakal<sup>2,3,4</sup>, Sanjeev  
22  
23 7 Singh<sup>5</sup>, Shifalika Goenka<sup>2,3</sup>, Prabhakaran Dorairaj<sup>2,3</sup>, Paramjit Gill<sup>6</sup>, Sheila  
24  
25 8 Greenfield<sup>1</sup>, Richard Lilford<sup>7</sup>, Semira Manaseki-Holland<sup>1\*</sup>  
26  
27  
28 9

29  
30 10 <sup>1</sup> Institute of Applied Health Research, University of Birmingham, Birmingham,  
31 11 United Kingdom

32 12 <sup>2</sup> Public Health Foundation of India, Delhi, India

33 13 <sup>3</sup> Centre for Chronic Disease Control, Delhi, India

34 14 <sup>4</sup> Sree Chitra Tirunal Institute of Medical Sciences and Technology, Kerala, India

35 15 <sup>5</sup> Amrita Institute of Medical Sciences, Kerala, India

36 16 <sup>6</sup> Academic Unit of Primary Care, University of Warwick, Coventry, United Kingdom

37 17 <sup>7</sup> Centre for Applied Health Research and Delivery, University of Warwick, Coventry,  
38 18 United Kingdom

39  
40  
41  
42 19  
43 20 \*Corresponding author

44  
45  
46  
47 21 Email: S.ManasekiHolland@bham.ac.uk  
48  
49  
50

51 22  
52 23  
53 24 ¶ These authors contributed equally to this work  
54  
55  
56  
57  
58  
59  
60

## 27 **ABSTRACT**

28 **Objectives** To investigate patient and healthcare provider (HCP) knowledge,  
29 attitudes and barriers to handover and healthcare communication during inpatient  
30 care and explore interventions for improving the storage and transfer of healthcare  
31 information.

32 **Methods** *Design:* Qualitative study comprising 41 semi-structured, individual  
33 interviews. Thematic analysis using the Framework Method with analyst  
34 triangulation. *Setting:* Three public hospitals in Himachal Pradesh and Kerala, India.  
35 *Participants:* 20 male (n=10) and female (n=10) chronic non-communicable disease  
36 (NCD) patients and 21 male (n=15) and female (n=6) HCPs. Purposive sampling  
37 was used to identify patients with chronic NCDs (Cardiovascular Disease, Chronic  
38 Respiratory Disease, Diabetes or Hypertension) and HCPs.

39 **Results** Patient themes: (1) *Public healthcare service characteristics*; (2) *HCP-*  
40 *patient communication*; (3) *Attitudes regarding medical information*. HCP themes: (1)  
41 *System factors*; (2) *Information exchange practices*; (3) *Quality improvement*  
42 *strategies*. Both patients and HCPs recognised public healthcare constraints that  
43 increased pressure on hospitals and subsequently limited consultation times.  
44 Systemic issues reported by HCPs were a lack of formal handover systems, training  
45 and accessible hospital-based records. Healthcare management communication  
46 during admission was inconsistent and lacked patient-centeredness, evidenced by  
47 varying patient of information received and some dissatisfaction with lifestyle advice.  
48 Senior doctors reported passing the duty of writing discharge notes to juniors when  
49 busy with high patient loads. Nurses reported predominantly providing verbal  
50 discharge instructions to patients. Patient-held documents facilitated information



1  
2  
3 51 exchange between HCPs but were not always transported. HCPs and patients  
4  
5 52 expressed positive views towards the idea of introducing patient-held booklets to  
6  
7  
8 53 improve the organisation and transfer of medical documents.  
9

10 54 **Conclusions** Handover and healthcare communication during chronic NCD inpatient  
11  
12 55 care are currently suboptimal. Structured information exchange systems and HCP  
13  
14 56 training are required to improve continuity and safety of care during critical  
15  
16  
17 57 transitions such as referral and discharge. Our findings suggest that patient-held  
18  
19 58 booklets may also assist in enhancing handover and patient-centred practices.  
20  
21  
22 59  
23  
24 60  
25  
26 61  
27  
28 62  
29  
30 63  
31  
32 64  
33  
34 65  
35  
36 66  
37  
38 67  
39  
40 68  
41  
42 69  
43  
44 70  
45  
46 71  
47  
48 72  
49  
50 73  
51  
52 74  
53  
54 75  
55  
56  
57  
58  
59  
60

## STRENGTHS AND LIMITATIONS OF THIS STUDY

- This is the first qualitative study, as far as the authors are aware, to explore both patient and healthcare provider knowledge, attitudes and barriers to multiple areas of handover and healthcare communication for chronic disease inpatients in India.
- The number of interviews from both patients and healthcare providers facilitated data saturation and provided a range of significant perspectives.
- Analyst triangulation corroborated data analysis and strengthened the credibility of the study.
- The accuracy of recall of patients interviewed at home (i.e. following hospital discharge) may have been limited by the delay between study recruitment and subsequent data collection.
- Awareness of the interviewer's context as a public health researcher may have resulted in participants distorting their responses to minimise critical judgement.

# 1. INTRODUCTION

The increasing burden of chronic, non-communicable diseases (NCDs) such as cardiovascular disease, diabetes and chronic respiratory disease has become a global pandemic that is disproportionately affecting low and middle-income countries (LMICs).<sup>1</sup> This is placing great demand on under-resourced health systems that can only be relieved by employing efficient and integrated approaches to healthcare management. Central to efficiency and integration in healthcare is effective handover communication, which involves the exchange of patient-specific information between healthcare providers (HCPs) and between HCPs and patients/carers.<sup>2</sup>

Between HCPs, information exchange is critical during clinical handovers, which are the points in care where information, responsibility and accountability for patient care are transferred from one HCP to another.<sup>3</sup> Such exchange is vital because safe and effective treatment can only be maintained if all relevant information has been shared and understood.<sup>4</sup> A wealth of research from high-income countries (HICs) has evidenced the association between communicative breakdowns during care transitions and risks to patient safety. These risks are pervasive throughout inpatient care and include delays in diagnosis, medication errors and life-threatening adverse events.<sup>5,6</sup> In addition, one-in-five patients experience adverse events following hospital discharge and research has established a link between such events and deficient handover communication.<sup>7-10</sup>

Between HCPs and patients, effective information exchange is also vital as patients can provide valuable information to those involved at various stages of their care pathway.<sup>4</sup> Excellent HCP-patient healthcare communication further empowers patients to become active participants in their healthcare management; this is a key

1  
2  
3 131 aspect of patient-centred care, which has been linked to improved patient  
4  
5 132 satisfaction and outcomes.<sup>11</sup>  
6

7  
8 133 Despite the established importance of handover communication for health  
9  
10 134 systems functioning and patient safety in HICs, there has been a relative dearth of  
11  
12 135 LMIC-based research focussing on this topic.<sup>12</sup> A recent (2019) study from South  
13  
14 136 Africa has found inadequate discharge planning to be a significant contributor to  
15  
16 137 avoidable causes of hospital readmission.<sup>13</sup> Across India, a handful of predominantly  
17  
18 138 single-site studies have evaluated and described deficiencies in information  
19  
20 139 exchange during referrals, hospital shift-change and discharge.<sup>14-19</sup> The current  
21  
22 140 study forms part of a series completed for a project investigating handover and  
23  
24 141 continuity of care for chronic NCD patients in Kerala and Himachal Pradesh states,  
25  
26 142 India. The first study to have been disseminated focussed on outpatient care, which  
27  
28 143 found issues such as suboptimal recording of information within patient-held medical  
29  
30 144 documents and an absence of formal systems for exchanging information between  
31  
32 145 levels of care.<sup>20</sup>  
33  
34  
35  
36

37  
38 146 Given these emerging challenges and the established link between deficient  
39  
40 147 handover communication during inpatient care and risks to patient safety, the current  
41  
42 148 study was conducted to gain novel insight into the transfer of healthcare information  
43  
44 149 during chronic NCD inpatient care across the same study areas of India. The primary  
45  
46 150 objective was to explore knowledge, attitudes and barriers to handover and  
47  
48 151 healthcare communication during the following points of inpatient care: 1)  
49  
50 152 Referral/transfer (i.e. communication between HCPs and between HCPs and  
51  
52 153 patients when referring and/or transferring patients) and 2) Hospital admission and  
53  
54 154 discharge (i.e. communication between HCPs and patients regarding condition,  
55  
56 155 treatment and/or management during hospital admission and discharge). A  
57  
58  
59  
60

1  
2  
3 156 secondary objective was to explore possible interventions to improve the storage  
4  
5 157 and transfer of key healthcare information.  
6  
7  
8 158  
9  
10  
11  
12 159

## 15 160 **2. METHODS**

### 18 161 **2.1 Overview**

22 162 We report findings from a qualitative study of handover communication for  
23  
24 163 chronic NCD inpatients in two Indian states. This study was conducted from  
25  
26 164 December 2014 to November 2015 across three public hospitals: one rural  
27  
28 165 secondary-care hospital in Himachal Pradesh state, and one peri-urban secondary-  
29  
30 166 care and one urban tertiary-care hospital in Kerala state. These settings were  
31  
32 167 selected to capture a range of hospital types within different geographical settings.  
33  
34 168 We selected public rather than private facilities as this is where a large proportion of  
35  
36 169 socioeconomically vulnerable patients access healthcare. See supplementary files  
37  
38 170 "S1" and "S2" for further information regarding the Indian healthcare system and  
39  
40 171 study settings.  
41  
42  
43  
44  
45 172

### 48 173 **2.2 Participant recruitment**

#### 52 174 **2.2.1 Patients**

55 175 Patients were recruited opportunistically from hospitals by trained research  
56  
57 176 assistants (n=6).<sup>21</sup> Purposive sampling was used to identify individuals who met the  
58  
59 177 following inclusion criteria:<sup>22</sup> adults (18 years+), admitted to hospital within 24 hours  
60

1  
2  
3 178 of a researcher first meeting them, due to complications from one of the following  
4  
5 179 chronic NCDs: cardiovascular disease, chronic respiratory disease, diabetes  
6  
7 180 mellitus, or hypertension. The identification process took place via researchers  
8  
9  
10 181 approaching ward nurses and asking them about patient demographics and  
11  
12 182 admission details; patients were excluded if judged too unwell to participate by ward  
13  
14 183 nurses. Patients who met the inclusion criteria were provided with verbal and  
15  
16 184 documented study information. Written consent was obtained from literate patients.  
17  
18 185 For illiterate patients, oral consent was obtained along with a thumbprint and  
19  
20 186 signature from a literate witness (i.e. family member/carer) in line with World Health  
21  
22 187 Organisation guidelines.<sup>23</sup> Patients were recruited until theoretical saturation was  
23  
24 188 achieved;<sup>24</sup> A total of 20 patients participated.  
25  
26  
27  
28  
29  
30  
31

### 32 190 **2.2.2 Healthcare Professionals**

33  
34  
35 191 Healthcare professionals (HCPs) were recruited from study hospitals by  
36  
37 192 trained research assistants (n=6). Due to the busy nature of the study settings,  
38  
39 193 opportunistic sampling was used to recruit as many HCPs as possible with a range  
40  
41 194 of roles and experience.<sup>21</sup> During recruitment, if HCPs stated they were too busy to  
42  
43 195 answer questions they were marked as “unavailable” and not approached again that  
44  
45 196 day; this did not exclude them from participating at another time. HCPs were also  
46  
47 197 recruited until theoretical saturation was achieved;<sup>24</sup> A total of 21 HCPs participated.  
48  
49  
50  
51

52 198

### 53 54 55 199 **2.3 Sample Size**

1  
2  
3 200 As well as saturation being reached for both participant groups independently,  
4  
5 201 the resulting sample size of 41 participants for this study was in accordance with  
6  
7 202 Baker and Edwards' review of sample sizes utilised in qualitative literature, indicating  
8  
9 203 it was sufficient for achieving overall data saturation.<sup>25</sup>  
10  
11  
12  
13 204  
14  
15

## 16 205 **2.4 Data collection**

17  
18  
19 206 The inpatient data analysed for this study is independent from the outpatient  
20  
21 207 study and was collected from different patients using separate topic guides.  
22  
23 208 Regarding HCP data, this study involves secondary analysis of HCP interviews  
24  
25 209 (n=17) included in the outpatient study from participants who were also involved in  
26  
27 210 inpatient care. A small number of additional interviews with HCPs solely involved in  
28  
29 211 inpatient care (n=4) have also been analysed in this study. All HCP interviews in the  
30  
31 212 India handover project were conducted within the same study period and used the  
32  
33 213 same topic guide (as most HCPs in the study areas worked with both outpatients  
34  
35 214 and inpatients on a daily basis).  
36  
37  
38  
39  
40

41 215 All interview data was collected entirely by the lead Indian researcher (SJ – an  
42  
43 216 experienced public health researcher) who was familiar with, but not local to, all  
44  
45 217 study areas and fluent in all local Indian dialects and English. Full consideration was  
46  
47 218 given prior to and throughout data collection to ensure that SJ was aware of the  
48  
49 219 potential limitations of working with participants from culturally and linguistically  
50  
51 220 diverse backgrounds. SJ was not involved in the treatment of patients or previously  
52  
53 221 known to HCPs.  
54  
55  
56  
57

58 222 The majority (n=16) of patient interviews took place in study hospitals. Due to  
59  
60 223 a lack of private spaces, they were conducted on inpatient wards in as quiet and

1  
2  
3 224 private a manner as possible. All participants consented to this and it was ensured  
4  
5 225 that HCPs were not present during patient interviews. In addition, a small number of  
6  
7 226 patient interviews (n=4) took place in patients' homes either five weeks (n=2) or four  
8  
9 227 months (n=2) following hospital discharge, as this was more convenient for them (i.e.  
10  
11 228 during recruitment they were in the process of being discharged and leaving  
12  
13 229 hospital). The specific follow-up times coincided with community visits being  
14  
15 230 completed for another quantitative study within the India handover project, which the  
16  
17 231 four patients were also participating in. All HCP interviews took place in hospital  
18  
19 232 offices. Interviews with patients and HCPs were conducted in either Hindi, English,  
20  
21 233 Malayalam or a mixture depending on interviewee preference and audio recorded  
22  
23 234 using a digital Dictaphone.  
24  
25  
26  
27  
28

29 235 Data collection took place in two stages. In the first stage (December 2014–  
30  
31 236 October 2015), pre-prepared topic guides were used to guide interviews. These were  
32  
33 237 developed using relevant handover literature and local knowledge of health systems  
34  
35 238 functioning within the study areas. They were also piloted over three rounds prior to  
36  
37 239 commencement of data collection to ensure they were clear as well as culturally and  
38  
39 240 contextually appropriate. Patient topic guides included open-ended questions  
40  
41 241 focussing on healthcare utilisation and experiences and attitudes of healthcare visits  
42  
43 242 and information exchange. The HCP topic guides differed slightly to capture  
44  
45 243 information on health systems policies and/or practices; it also included questions  
46  
47 244 regarding handover training and potential interventions for improving practices.  
48  
49  
50  
51

52 245 Following the first stage of data collection, on the 11<sup>th</sup> of October 2015, a  
53  
54 246 handover expert meeting took place in Delhi, India to present preliminary findings  
55  
56 247 and discuss possible interventions. Researchers from the University of Birmingham  
57  
58 248 and the University of Warwick (UK) facilitated the presentation of results and group  
59  
60



1  
2  
3 249 discussions at the meeting. Representatives (n=27) from the following international,  
4  
5 250 Indian national and state-level organisations participated: The World Health  
6  
7 251 Organisation; The World Bank; ACCESS Health International; The Ministry of Health  
8  
9 252 and Family Welfare; The Public Health Foundation of India; The National Centre for  
10  
11 253 Disease Control; The Centre for Chronic Disease Control; The National Health  
12  
13 254 System Resource Centre; The All India Institute of Medical Sciences; Aga Khan  
14  
15 255 Health Services; AMRITA Institute of Medical Sciences and Fortis Hospitals. During  
16  
17 256 discussions, a consensus was reached that patient-held booklets were likely to be an  
18  
19 257 acceptable and sustainable intervention to improve information exchange. This was  
20  
21 258 based on the international success of similar patient-held records used in maternal  
22  
23 259 healthcare around the world.<sup>26-30</sup> It also took into account the delays in developing  
24  
25 260 universal electronic information systems and the fact that such systems will not  
26  
27 261 necessarily address the quality of communication between HCPs and patients.  
28  
29 262 Overall, it was opted as the most pragmatic, cost-effective intervention and multiple  
30  
31 263 experts felt that booklets could also improve patient self-management if they  
32  
33 264 contained disease-specific advice.

34  
35  
36  
37  
38  
39  
40 265 Therefore, following the meeting the second stage of qualitative data  
41  
42 266 collection (October–November 2015) commenced. Topic guides were updated to  
43  
44 267 include questions regarding the utility of patient-held booklets. In addition, if  
45  
46 268 participants stated they had limited time then researchers interviewed them using a  
47  
48 269 shortened topic guide containing targeted questions on patient-held booklets.  
49  
50  
51  
52

53 270

## 54 55 56 271 **2.5 Data Analysis**

57  
58  
59  
60

1  
2  
3 272 All audio recordings of interviews were transcribed verbatim and, if necessary,  
4  
5 273 translated into English by SJ. All translations were crosschecked for accuracy by a  
6  
7 274 qualitative expert in India (SG – professor of bioethics and social and behavioural  
8  
9 275 sciences with expertise in NCDs), who was also familiar with the local context and  
10  
11 276 fluent in all languages used during interviews. Following this, all transcripts were sent  
12  
13 277 to the lead UK researcher (CH – public health PhD student) for analysis. CH became  
14  
15 278 familiar with all study sites prior to analysis during multiple research-related visits  
16  
17 279 that were facilitated by the Public Health Foundation of India and the Ministry of  
18  
19 280 Health and Family Welfare in Kerala.

23  
24 281 Data was analysed using the Framework Method,<sup>31</sup> as this is the method most  
25  
26 282 commonly used for semi-structured interview transcripts. An inductive thematic  
27  
28 283 approach to analysis utilised in Grounded Theory was employed,<sup>32 33</sup> which focused  
29  
30 284 on analysing interviews in their entirety and identifying concepts relevant to handover  
31  
32 285 and healthcare communication during inpatient care that emerged from interviews.  
33  
34 286 Analysis occurred through the following stages central to the Framework Method:  
35  
36 287 transcription, familiarisation, coding, charting, and interpretation. Over a one-month  
37  
38 288 period, familiarisation with the data took place via the slow reading of transcripts and  
39  
40 289 CH consulted with SJ to gain a clear understanding of interview contexts. Once this  
41  
42 290 was complete, coding began and two transcripts were chosen at random from each  
43  
44 291 batch of interviews (i.e. 2 patient and 2 HCP transcripts) for independent coding by  
45  
46 292 an additional UK analyst (SG – professor of medical sociology with expertise in  
47  
48 293 cross-cultural research) for analyst triangulation.<sup>34</sup> Patient and HCP transcripts were  
49  
50 294 coded separately in order to be able to assess similarities and differences between  
51  
52 295 participant groups - patient transcripts were coded first. The coding process involved  
53  
54 296 further familiarisation with the data, followed by open coding where certain transcript  
55  
56  
57  
58  
59  
60

1  
2  
3 297 content was highlighted and allocated descriptive labels (codes) to interpret the  
4  
5 298 phenomena identified in the text. The development of codes and themes was  
6  
7  
8 299 entirely data-led and analysed manually.<sup>35</sup>  
9

10  
11 300 Microsoft Excel was used to organise participant codes. CH created initial  
12  
13 301 categories by clustering similar codes developed from the two randomly selected  
14  
15 302 patient and HCP transcripts. CH and the additional UK analyst (SG) then met to  
16  
17 303 discuss their analyses. As both had produced similar codes and concepts, the  
18  
19 304 categories that were created were mutually agreed upon. CH then continued with  
20  
21 305 category development until all transcripts had been coded and inserted into the  
22  
23 306 spreadsheet. Following analysis of 20 patient and 21 HCP transcripts, no new  
24  
25 307 categories had been produced. This served as confirmation that data saturation had  
26  
27 308 been met.<sup>24</sup>  
28  
29  
30  
31

32  
33 309 Following coding, categories were grouped into subcategories and linked to  
34  
35 310 produce themes. Then, via the process of charting,<sup>31 35</sup> themes for each participant  
36  
37 311 group were used to create a framework matrix into which participants' quotes were  
38  
39 312 inserted, corresponding to their representative subcategory. This provided a visual  
40  
41 313 representation of themes, which facilitated the mapping and interpretation of the  
42  
43 314 data. After completing separate analysis of patient and HCP data, the results of both  
44  
45 315 participant groups were compared to assess similarities and differences between  
46  
47 316 their reports of knowledge, attitudes and barriers to handover and healthcare  
48  
49 317 communication. A Venn diagram was used to summarise the separate and  
50  
51 318 overlapping content, which was linked to subcategories from original themes.  
52  
53  
54  
55

56 319

## 58 320 **2.7 Patient and public involvement**

1  
2  
3 321 Patients and the public were not involved in the initial design of this study.  
4  
5 322 Patients and carers were first involved during the pilot phase prior to formal data  
6  
7 323 collection, where the topic guides, consent and information sheets were piloted over  
8  
9 324 three rounds. During this time, they were consulted and given the opportunity to  
10  
11 325 provide feedback to ensure the study materials were comprehensible and culturally  
12  
13 326 and contextually appropriate. Patients and the public were not involved in any other  
14  
15 327 aspect of the study recruitment or conduct, but findings have been disseminated  
16  
17 328 publicly via an expert meeting (including professionals working with patient groups)  
18  
19 329 and open access web pages.  
20  
21  
22  
23  
24  
25  
26  
27  
28  
29

330

331

## 32 332 **3. RESULTS**

### 33 333 **3.1 Patient characteristics**

34  
35  
36 334 20 male (n=10) and female (n=10) patients aged between 25 and 72 years old  
37  
38 335 were interviewed. Participants' background characteristics were varied (Table 1).  
39  
40 336 Patients completed interviews in English (n=11), Hindi (n=4), Malayalam (n=4) and a  
41  
42 337 mixture of Hindi and English (n=1).  
43  
44  
45  
46  
47  
48  
49  
50  
51  
52  
53  
54  
55  
56  
57  
58  
59  
60

Table 1. Patient characteristics

| Characteristics                                        | 1  | 2  | 3  | 4  | 5  | 6  | 7  | 8  | 9  | 10 | 11 | 12 | 13 | 14 | 15 | 16 | 17 | 18 | 19 | 20 | N (%)     |
|--------------------------------------------------------|----|----|----|----|----|----|----|----|----|----|----|----|----|----|----|----|----|----|----|----|-----------|
| <b>Age</b>                                             | 65 | 45 | 70 | 58 | 71 | 56 | 57 | 70 | 55 | 25 | 72 | 50 | 55 | 69 | 70 | 50 | 70 | 70 | 70 | 70 | 25-72     |
| <b>Sex</b>                                             |    |    |    |    |    |    |    |    |    |    |    |    |    |    |    |    |    |    |    |    |           |
| Male                                                   | ✓  | ✓  | ✓  | ✓  | ✓  |    |    |    | ✓  | ✓  | ✓  | ✓  |    |    |    | ✓  |    |    |    |    | 10 (50.0) |
| Female                                                 |    |    |    |    |    | ✓  | ✓  | ✓  |    |    |    |    | ✓  | ✓  | ✓  |    | ✓  | ✓  | ✓  | ✓  | 10 (50.0) |
| <b>Literacy</b>                                        |    |    |    |    |    |    |    |    |    |    |    |    |    |    |    |    |    |    |    |    |           |
| Illiterate                                             |    |    |    |    |    |    |    | ✓  |    |    |    |    | ✓  |    | ✓  | ✓  | ✓  | ✓  | ✓  | ✓  | 8 (40.0)  |
| Literate                                               | ✓  | ✓  | ✓  | ✓  | ✓  | ✓  | ✓  |    | ✓  | ✓  | ✓  | ✓  |    | ✓  |    |    |    |    |    |    | 12 (60.0) |
| <b>Education Level</b>                                 |    |    |    |    |    |    |    |    |    |    |    |    |    |    |    |    |    |    |    |    |           |
| None/minimal primary school-level                      |    |    |    |    |    |    |    | ✓  |    |    |    | ✓  | ✓  |    | ✓  | ✓  | ✓  | ✓  | ✓  | ✓  | 9 (45.0)  |
| Completed lower primary school                         |    |    |    |    | ✓  |    | ✓  |    |    |    |    |    |    |    |    |    |    |    |    |    | 2 (10.0)  |
| Completed upper primary school                         |    |    |    |    |    | ✓  |    |    |    |    |    |    |    |    |    |    |    |    |    |    | 1 (5.0)   |
| Completed secondary school                             |    |    |    |    |    |    |    |    | ✓  |    |    |    |    |    |    |    |    |    |    |    | 1 (5.0)   |
| University graduate (or above)                         | ✓  |    |    | ✓  |    |    |    |    |    | ✓  | ✓  |    |    |    |    |    |    |    |    |    | 4 (20.0)  |
| No data                                                |    | ✓  | ✓  |    |    |    |    |    |    |    |    |    |    | ✓  |    |    |    |    |    |    | 3 (15.0)  |
| <b>Employment Status</b>                               |    |    |    |    |    |    |    |    |    |    |    |    |    |    |    |    |    |    |    |    |           |
| Employed                                               |    | ✓  |    | ✓  | ✓  |    |    |    | ✓  |    |    | ✓  | ✓  | ✓  |    | ✓  |    |    |    |    | 8 (40.0)  |
| Unemployed                                             |    |    |    |    |    | ✓  | ✓  | ✓  |    |    |    |    |    |    | ✓  |    | ✓  | ✓  | ✓  | ✓  | 8 (40.0)  |
| Student                                                |    |    |    |    |    |    |    |    |    | ✓  |    |    |    |    |    |    |    |    |    |    | 1 (5.0)   |
| Retired                                                | ✓  |    | ✓  |    |    |    |    |    |    |    | ✓  |    |    |    |    |    |    |    |    |    | 3 (15.0)  |
| <b>Chronic NCD(s) (related to admission)*</b>          |    |    |    |    |    |    |    |    |    |    |    |    |    |    |    |    |    |    |    |    |           |
| Chronic Respiratory Disease                            |    |    | ✓  | ✓  |    | ✓  |    | ✓  |    |    |    |    | ✓  |    |    | ✓  |    |    |    |    | 6 (30.0)  |
| Diabetes                                               | ✓  |    |    |    |    |    |    |    |    |    |    |    |    | ✓  | ✓  | ✓  | ✓  | ✓  | ✓  | ✓  | 8 (40.0)  |
| Hypertension                                           |    |    |    |    |    |    |    |    | ✓  | ✓  | ✓  | ✓  |    |    |    | ✓  | ✓  | ✓  |    |    | 6 (30.0)  |
| Cardiovascular Disease (other than Hypertension alone) | ✓  | ✓  |    |    | ✓  |    | ✓  | ✓  | ✓  | ✓  | ✓  | ✓  |    |    |    |    |    |    |    |    | 9 (45.0)  |
| <b>Language(s) used during Interview</b>               |    |    |    |    |    |    |    |    |    |    |    |    |    |    |    |    |    |    |    |    |           |
| English (only)                                         | ✓  | ✓  | ✓  | ✓  |    |    |    |    |    |    |    |    |    | ✓  | ✓  | ✓  | ✓  | ✓  | ✓  | ✓  | 11 (55.0) |
| Hindi (only)                                           |    |    |    |    |    | ✓  | ✓  | ✓  | ✓  |    |    |    |    |    |    |    |    |    |    |    | 4 (20.0)  |
| Malayalam (only)                                       |    |    |    |    |    |    |    |    |    | ✓  | ✓  | ✓  | ✓  |    |    |    |    |    |    |    | 4 (20.0)  |
| English & Hindi (mixture)                              |    |    |    |    | ✓  |    |    |    |    |    |    |    |    |    |    |    |    |    |    |    | 1 (5.0)   |

\* Patients could select more than one answer for this question

## 3.2 Healthcare Professional characteristics

21 male (n=15) and female (n=6) HCPs aged between 22 and 55 years old were interviewed. HCP roles included doctors (n=17), nurses (n=2), pharmacists (n=1) and a medical records officer (n=1). HCP qualifications and experience were varied (Table 2). HCPs completed interviews in English (n=15), Hindi (n=2), Malayalam (n=2) and a mixture of Hindi and English (n=2).

For peer review only

Table 2. Healthcare professional characteristics

| Characteristics                          | 1  | 2  | 3  | 4  | 5  | 6  | 7  | 8  | 9  | 10 | 11 | 12 | 13 | 14 | 15 | 16 | 17 | 18 | 19 | 20 | 21 | N (%)     |
|------------------------------------------|----|----|----|----|----|----|----|----|----|----|----|----|----|----|----|----|----|----|----|----|----|-----------|
| <b>Age</b>                               | 44 | 24 | 33 | 25 | 23 | 39 | 44 | 35 | 52 | 50 | 50 | 43 | 50 | 40 | 46 | 55 | 22 | 35 | 35 | 45 | 35 | 22-55     |
| <b>Sex</b>                               |    |    |    |    |    |    |    |    |    |    |    |    |    |    |    |    |    |    |    |    |    |           |
| Male                                     | ✓  |    | ✓  | ✓  | ✓  |    | ✓  |    | ✓  | ✓  | ✓  | ✓  | ✓  | ✓  | ✓  | ✓  | ✓  |    |    |    | ✓  | 15 (71.4) |
| Female                                   |    | ✓  |    |    |    | ✓  |    | ✓  |    |    |    |    |    |    |    |    |    | ✓  | ✓  |    | ✓  | 6 (28.6)  |
| <b>Qualification/s*</b>                  |    |    |    |    |    |    |    |    |    |    |    |    |    |    |    |    |    |    |    |    |    |           |
| Doctor of Medicine (MD)                  | ✓  |    | ✓  |    |    |    | ✓  | ✓  | ✓  | ✓  | ✓  | ✓  | ✓  | ✓  | ✓  | ✓  | ✓  |    |    |    |    | 13 (61.9) |
| Master of Public Health (MPH)            |    |    |    |    |    | ✓  |    |    |    |    |    |    |    |    |    |    |    |    |    |    |    | 1 (4.8)   |
| Bachelor of Medicine (MBBS)              | ✓  | ✓  | ✓  | ✓  | ✓  | ✓  | ✓  | ✓  | ✓  | ✓  | ✓  | ✓  | ✓  | ✓  | ✓  | ✓  | ✓  |    |    |    |    | 17 (81.0) |
| BSc Nursing                              |    |    |    |    |    |    |    |    |    |    |    |    |    |    |    |    |    | ✓  |    |    | ✓  | 2 (9.5)   |
| BSc Pharmacy                             |    |    |    |    |    |    |    |    |    |    |    |    |    |    |    |    |    |    | ✓  |    |    | 1 (4.8)   |
| Graduate (i.e. non-medical degree)       |    |    |    |    |    |    |    |    |    |    |    |    |    |    |    |    |    |    |    |    | ✓  | 1 (4.8)   |
| <b>Official position</b>                 |    |    |    |    |    |    |    |    |    |    |    |    |    |    |    |    |    |    |    |    |    |           |
| Medical Superintendent                   |    |    |    |    |    | ✓  |    |    |    |    |    |    |    |    |    |    |    |    |    |    |    | 1 (4.8)   |
| Chief Medical Officer                    |    |    |    |    |    |    |    |    | ✓  |    |    |    |    |    |    |    |    |    |    |    |    | 1 (4.8)   |
| Medical Officer                          |    |    |    |    |    |    |    |    |    |    | ✓  |    |    |    |    |    |    |    |    |    |    | 1 (4.8)   |
| Consultant                               | ✓  |    | ✓  |    |    |    | ✓  | ✓  |    |    |    |    | ✓  | ✓  | ✓  | ✓  | ✓  |    |    |    |    | 9 (42.9)  |
| Surgeon                                  |    | ✓  |    |    |    |    |    |    |    | ✓  |    |    |    |    |    |    |    |    |    |    |    | 2 (9.5)   |
| General Medicine                         |    |    |    |    |    |    |    |    |    | ✓  |    |    |    |    |    |    |    |    |    |    |    | 1 (4.8)   |
| Intern Doctor                            |    |    |    | ✓  | ✓  |    |    |    |    |    |    |    |    |    |    |    |    |    |    |    |    | 2 (9.5)   |
| Ward Nurse                               |    |    |    |    |    |    |    |    |    |    |    |    |    |    |    |    |    | ✓  |    |    | ✓  | 2 (9.5)   |
| Pharmacist                               |    |    |    |    |    |    |    |    |    |    |    |    |    |    |    |    |    |    | ✓  |    |    | 1 (4.8)   |
| Medical Records Officer                  |    |    |    |    |    |    |    |    |    |    |    |    |    |    |    |    |    |    |    |    | ✓  | 1 (4.8)   |
| <b>Years of experience in position</b>   |    |    |    |    |    |    |    |    |    |    |    |    |    |    |    |    |    |    |    |    |    |           |
| <1                                       |    | ✓  |    |    | ✓  |    |    |    |    |    |    |    |    |    |    |    |    |    |    |    |    | 2 (9.5)   |
| 1 – 3                                    |    |    |    | ✓  |    |    |    |    |    |    |    |    |    |    |    |    |    |    |    |    |    | 1 (4.8)   |
| 4 – 6                                    |    |    |    |    |    | ✓  |    | ✓  |    |    |    |    |    |    |    |    |    | ✓  |    | ✓  | ✓  | 5 (23.8)  |
| 7 – 10                                   |    |    | ✓  |    |    |    | ✓  |    |    |    |    |    |    |    |    |    |    |    |    | ✓  |    | 3 (14.3)  |
| >10                                      | ✓  |    |    |    |    |    |    |    | ✓  | ✓  | ✓  | ✓  | ✓  | ✓  | ✓  | ✓  | ✓  | ✓  | ✓  |    |    | 10 (47.6) |
| <b>Place of work</b>                     |    |    |    |    |    |    |    |    |    |    |    |    |    |    |    |    |    |    |    |    |    |           |
| General Hospital                         |    | ✓  | ✓  | ✓  | ✓  |    |    |    |    |    |    |    |    | ✓  |    | ✓  | ✓  | ✓  | ✓  |    |    | 9 (42.9)  |
| Regional Hospital                        | ✓  |    |    |    |    |    |    |    | ✓  | ✓  | ✓  |    | ✓  |    |    |    |    |    |    | ✓  | ✓  | 7 (33.3)  |
| Taluk Hospital                           |    |    |    |    |    | ✓  | ✓  | ✓  |    |    | ✓  |    |    |    | ✓  |    |    |    |    |    |    | 5 (23.8)  |
| <b>Language(s) used during interview</b> |    |    |    |    |    |    |    |    |    |    |    |    |    |    |    |    |    |    |    |    |    |           |
| English (only)                           |    | ✓  | ✓  | ✓  | ✓  | ✓  | ✓  | ✓  | ✓  | ✓  | ✓  | ✓  | ✓  | ✓  | ✓  | ✓  | ✓  |    |    |    |    | 15 (71.4) |
| Hindi (only)                             |    |    |    |    |    |    |    |    |    |    |    |    |    |    |    |    |    |    |    | ✓  | ✓  | 2 (9.5)   |
| Malayalam (only)                         |    |    |    |    |    |    |    |    |    |    |    |    |    |    |    |    |    | ✓  | ✓  |    |    | 2 (9.5)   |
| English & Hindi (mixture)                | ✓  |    |    |    |    |    |    |    |    |    |    | ✓  |    |    |    |    |    |    |    |    |    | 2 (9.5)   |

\* HCPs could select more than one answer for this question

### 344 3.3 Charted Data

345 During analysis of patient and HCP data, three themes (with subcategories)  
346 emerged for each participant group. Patient themes were: 1) Public healthcare  
347 service characteristics, 2) HCP to patient communication and 3) Attitudes regarding  
348 medical information (Table 3). HCP themes were: 1) System factors, 2) Information  
349 exchange practices and 3) Quality improvement strategies (Table 4).

350 Following separate analysis of patient and HCP data, the results of both  
351 participant groups were compared to assess similarities and differences between  
352 their reports of knowledge, attitudes and barriers to handover and healthcare  
353 communication; the results of this comparison are displayed in Figure 1. The  
354 similarities will be described first, followed by the differences. To ensure  
355 confidentiality, numerical pseudonyms have been used when presenting quotes.



Table 3. Summary of charted data for inpatients (IPs)

| IP | Public healthcare service characteristics |                                 | HCP to patient communication                   |                      |                         | Attitudes regarding medical information |                                   |                                       |
|----|-------------------------------------------|---------------------------------|------------------------------------------------|----------------------|-------------------------|-----------------------------------------|-----------------------------------|---------------------------------------|
|    | Large patient loads                       | Deficient primary care services | Verbal healthcare information during admission | Referral information | Impoliteness/impatience | Transportation of medical documents     | Patient-held booklet intervention | Dissatisfaction with lifestyle advice |
| 1  |                                           |                                 |                                                |                      |                         | ✓                                       |                                   |                                       |
| 2  |                                           |                                 | ✓                                              |                      |                         |                                         |                                   |                                       |
| 3  | ✓                                         |                                 | ✓                                              |                      | ✓                       | ✓                                       |                                   |                                       |
| 4  |                                           |                                 | ✓                                              |                      |                         | ✓                                       |                                   |                                       |
| 5  |                                           | ✓                               | ✓                                              | ✓                    | ✓                       |                                         |                                   |                                       |
| 6  |                                           |                                 |                                                | ✓                    |                         | ✓                                       |                                   |                                       |
| 7  | ✓                                         | ✓                               |                                                | ✓                    |                         | ✓                                       |                                   |                                       |
| 8  |                                           |                                 |                                                | ✓                    |                         |                                         |                                   |                                       |
| 9  |                                           |                                 | ✓                                              |                      |                         |                                         |                                   |                                       |
| 10 |                                           |                                 | ✓                                              |                      |                         |                                         |                                   |                                       |
| 11 | ✓                                         |                                 | ✓                                              |                      |                         | ✓                                       |                                   |                                       |
| 12 |                                           |                                 | ✓                                              | ✓                    |                         | ✓                                       |                                   |                                       |
| 13 |                                           |                                 | ✓                                              |                      |                         | ✓                                       |                                   |                                       |
| 14 |                                           | ✓                               | ✓                                              |                      |                         |                                         | ✓                                 | ✓                                     |
| 15 |                                           | ✓                               | ✓                                              |                      | ✓                       |                                         | ✓                                 | ✓                                     |
| 16 |                                           | ✓                               | ✓                                              |                      |                         | ✓                                       | ✓                                 |                                       |
| 17 |                                           |                                 | ✓                                              |                      |                         | ✓                                       | ✓                                 | ✓                                     |
| 18 |                                           | ✓                               | ✓                                              |                      |                         | ✓                                       | ✓                                 |                                       |
| 19 |                                           |                                 | ✓                                              |                      |                         | ✓                                       | ✓                                 |                                       |
| 20 |                                           |                                 | ✓                                              |                      |                         |                                         | ✓                                 | ✓                                     |

Table 4. Summary of charted data for healthcare professionals (HCPs)

| HCP | System factors              |                                            | Information exchange practices                                      |                         |                    |                                |                        | Quality improvement strategies          |                             |                                   |                              |                                   |
|-----|-----------------------------|--------------------------------------------|---------------------------------------------------------------------|-------------------------|--------------------|--------------------------------|------------------------|-----------------------------------------|-----------------------------|-----------------------------------|------------------------------|-----------------------------------|
|     | Time & resource constraints | Absence of handover communication training | Absence of structured formats for information exchange between HCPs | Hospital record keeping | Ad-hoc phone calls | Patient-held medical documents | Discharge instructions | Hierarchical transfer of responsibility | Increase resource provision | Introduce formal referral systems | Implement "e-health" systems | Patient-held booklet intervention |
| 1   |                             |                                            | ✓                                                                   |                         |                    | ✓                              | ✓                      |                                         | ✓                           |                                   |                              |                                   |
| 2   |                             |                                            | ✓                                                                   |                         |                    | ✓                              | ✓                      |                                         |                             |                                   |                              |                                   |
| 3   |                             |                                            |                                                                     |                         |                    | ✓                              |                        |                                         | ✓                           | ✓                                 | ✓                            |                                   |
| 4   | ✓                           |                                            | ✓                                                                   |                         |                    | ✓                              | ✓                      |                                         |                             |                                   |                              |                                   |
| 5   |                             |                                            | ✓                                                                   | ✓                       |                    | ✓                              |                        |                                         |                             |                                   |                              |                                   |
| 6   | ✓                           |                                            | ✓                                                                   |                         |                    |                                |                        |                                         | ✓                           |                                   | ✓                            |                                   |
| 7   | ✓                           |                                            | ✓                                                                   |                         |                    | ✓                              |                        |                                         |                             |                                   |                              |                                   |
| 8   | ✓                           |                                            |                                                                     |                         |                    | ✓                              |                        |                                         |                             |                                   |                              |                                   |
| 9   |                             |                                            |                                                                     |                         |                    |                                |                        |                                         | ✓                           |                                   |                              |                                   |
| 10  | ✓                           | ✓                                          | ✓                                                                   |                         |                    | ✓                              | ✓                      |                                         |                             |                                   |                              |                                   |
| 11  | ✓                           | ✓                                          | ✓                                                                   |                         |                    |                                |                        |                                         | ✓                           | ✓                                 |                              |                                   |
| 12  |                             |                                            |                                                                     | ✓                       |                    | ✓                              |                        |                                         | ✓                           |                                   | ✓                            |                                   |
| 13  | ✓                           |                                            |                                                                     |                         |                    |                                |                        |                                         |                             | ✓                                 |                              | ✓                                 |
| 14  | ✓                           |                                            |                                                                     |                         |                    |                                |                        |                                         |                             |                                   |                              | ✓                                 |
| 15  | ✓                           |                                            |                                                                     |                         |                    | ✓                              |                        |                                         |                             |                                   |                              | ✓                                 |
| 16  |                             |                                            |                                                                     |                         |                    |                                |                        |                                         |                             |                                   |                              | ✓                                 |
| 17  | ✓                           |                                            |                                                                     |                         |                    |                                |                        | ✓                                       |                             |                                   |                              | ✓                                 |
| 18  |                             |                                            |                                                                     | ✓                       |                    | ✓                              | ✓                      | ✓                                       |                             |                                   |                              |                                   |
| 19  | ✓                           |                                            |                                                                     | ✓                       |                    |                                |                        |                                         |                             |                                   |                              |                                   |
| 20  |                             |                                            |                                                                     | ✓                       |                    |                                |                        |                                         |                             |                                   |                              |                                   |
| 21  | ✓                           |                                            |                                                                     |                         |                    |                                |                        | ✓                                       |                             |                                   |                              |                                   |

## 3.4 Overlapping content

### 3.4.1 Public healthcare constraints

During interviews, a number of patients reported that they chose to visit public hospitals because of the better availability of healthcare staff compared to local healthcare facilities, such as smaller hospitals and primary/community health centres:

*"We have very limited time, we did go to local hospital but doctors are not there. So if we get time we will come here rather than going to a hospital where there are no doctors. (IP 15)"*

However, multiple patients also reported that public hospitals were often crowded with high daily patient loads:

*"There is so much crowd there you can't ask or hear anything there... so many people are there now, you cannot do anything. (IP 11)"*

The human resource issues at public primary and community healthcare facilities were also mentioned by HCPs:

*"It will be useful if availability of doctors is ensured at the peripheral institutions around the clock. At times it is not there. (DOC 1)"*

Additionally, in our study settings most hospital doctors worked in both outpatient clinics and inpatient wards on a daily basis. Many doctors expressed concerns of time pressures due to the large patient volumes seen at hospital outpatient clinics and the subsequent lack of time they had to attend to all patients:

1  
2  
3 377 *“We can hardly spend five minutes with each patient, seeing the crowd you will*  
4  
5 378 *just want to finish everyone soon. (DOC 7)”*  
6  
7

8 379 Some doctors also reported that human and medical resource constraints across  
9  
10 public healthcare facilities were hindering the quality of care that could be provided:  
11  
12

13 381 *“[It’s] not [about] motivation, [it’s about] resource limitation. It’s not humanly*  
14  
15 382 *possible to see people every day for seven days. Quality definitely gets*  
16  
17 383 *compromised. (DOC 3)”*  
18  
19  
20

21 384

### 24 385 **3.4.2 Referral communication**

25  
26  
27 386 A number of patients who recalled being referred from a previous healthcare  
28  
29 387 facility to the hospital reported that they were not provided with any referral  
30  
31 388 information:  
32  
33

34  
35 389 *“No, they didn’t give any parchi [papers]. We were getting medicines right only*  
36  
37 390 *that is with us. (IP 8)”*  
38  
39

40 391 HCPs also discussed referral communication. Doctors explained that there  
41  
42 392 were no structured processes to follow for information exchange during referrals:  
43  
44

45 393 *“Yeah there is no proper way of doing it... inpatients sometimes we have to*  
46  
47 394 *[refer] but as I told you we never had a structured format. (DOC 14)”*  
48  
49

50  
51 395 Despite the lack of structured systems, some doctors explained that they  
52  
53 396 would make ad-hoc calls to ensure that some information was transferred when  
54  
55 397 referring a patient. However, this appeared to depend on how well they knew the  
56  
57 398 patient or doctor:  
58  
59  
60

1  
2  
3 399 *“Sometimes I call the doctor to tell them that so and so is coming. Please do*  
4  
5 400 *the needful. If I know the patient or doctor. (DOC 11)”*  
6  
7

8 401  
9

### 10 11 402 **3.4.3 Patient-held medical information** 12 13

14 403 At the point of hospital admission, patient-held notes and/or medical records  
15  
16 404 can facilitate optimal care by providing HCPs with key patient-specific information.  
17  
18 405 When asked about whether they brought medical papers to the hospital, most  
19  
20 406 patients reported that they regularly stored and transported papers to HCP visits;  
21  
22 407 these included referral notes, prescription cards, test results and other records from  
23  
24 408 inpatient/outpatient/primary care:  
25  
26

27  
28  
29 409 *““Yeah we have always kept everything safely. [Shows researcher a bag with*  
30  
31 410 *all sort of papers like reports, lab tests, etc.] (IP 3)”*  
32  
33

34 411 Doctors also talked about patient-held medical information during interviews.  
35  
36 412 For example, some doctors reported that patients regularly kept and transported  
37  
38 413 their medical records:  
39  
40

41  
42 414 *“Almost everyone comes with medical reports. (DOC 11)”*  
43  
44

45 415 However, other doctors described that, in their experience, the availability of  
46  
47 416 patient-held records was less consistent and that this could have a negative impact  
48  
49 417 on the continuity of care provided:  
50  
51

52 418 *“Some of them do bring investigations and all others don’t bring much and we*  
53  
54 419 *have to work out what happened from the start. (DOC 3)”*  
55  
56

57  
58 420  
59  
60

#### 3.4.4 Healthcare management communication

When asked about verbal HCP communication, many patients reported that during admission and/or discharge a HCP had provided them with some basic verbal healthcare management information (i.e. medication, treatment, lifestyle and/or follow-up requirements). However, the quantity of information received appeared to vary notably between patients. For example, some recalled being given detailed instructions:

*“Doctor says everything. I was given medicines and now they asked me to take injections also. Doctor is saying I am not controlling my sugar. The nurse taught me how to take injection. (IP 19)”*

Conversely, others appeared to receive relatively limited information and one carer reported having to seek healthcare advice from alternative sources:

*“Doctors don’t explain everything. We speak to our friends and get details from them. (Carer - IP 16)”*

HCPs also discussed their healthcare communication practices with patients. Whilst talking about discharge, a nurse described the usual amount of time taken to explain information to each patient:

*“Usually we take 20 to 25 minutes to instruct the patients. If the patients understand then it can be even faster. (NUR 1)”*

Doctors reported that they provided patients with documented information on discharge cards and verbally advised patients to return to their local HCP/healthcare institution during the discharge consultation:

1  
2  
3 443 *"We give them a discharge card. Discharge card is there we have written and*  
4  
5 444 *then we refer them to the local hospital or where they come from. (DOC 15)"*  
6  
7  
8

9 445

### 10 11 12 446 **3.4.5 Booklet intervention**

13  
14  
15 447 During interviews that took place after the handover expert meeting, patients  
16  
17 448 were asked for their opinion regarding the utility of a patient-held booklet where  
18  
19 449 records could be stored, organised and transported to HCP visits. Most appeared to  
20  
21 450 think that it could be effective and help with self-management, including those who  
22  
23 451 were illiterate:

24  
25  
26  
27 452 *"Yeah, sometimes we don't know what to do so it would be good if some*  
28  
29 453 *paper is there to help us. We can't read it ourselves but our son or daughter-*  
30  
31 454 *in-law can help us. (IP 17)"*  
32  
33

34  
35 455 HCPs were also asked for their opinions regarding the booklet intervention.  
36  
37 456 Many generally felt it could be useful, but various conditions and/or reservations  
38  
39 457 were also expressed. For example, doctors felt that the success of the booklet would  
40  
41 458 rely on patient attitudes:

42  
43  
44  
45 459 *"That will depend on the patients, if they maintain that and bring it every time.*  
46  
47 460 *For us there is no change, we write our observations in paper or notebook,*  
48  
49 461 *doesn't matter... Might be helpful. (DOC 22)"*  
50  
51

52 462 Related to this, one doctor felt that in order to see the most benefit, patients  
53  
54 463 needed to be regularly instructed to keep and transport their medical documents:

55  
56  
57 464 *"We write the communication but the patients don't keep them proper. I think*  
58  
59 465 *we have to tell the patients to keep the letters and papers. (DOC 4)"*  
60

1  
2  
3 466  
4  
5  
6 467  
7  
8  
9 468

### 3.5 Content unique to patients

#### 3.5.1 Attitudes regarding HCP communication during admission

16 470 A few patients recalled receiving some impolite/impatient treatment from  
17  
18 471 healthcare staff during their hospital admission:

21 472 *“The doctors don’t speak much. They explain but get angry if you don’t*  
22  
23 473 *understand them. (IP 3)”*

26 474 In addition, some patients expressed dissatisfaction with the lifestyle advice  
27  
28  
29 475 provided. In particular, patients of lower socioeconomic status felt that nutritional  
30  
31 476 instructions were not suitable for them due to their time and financial constraints:

34 477 *“We are daily labourers we can’t follow all the instructions... We can’t follow*  
35  
36 478 *that, we are poor we do hard work and we just can’t concentrate on eating.*  
37  
38 479 *Whatever is there we just eat. (IP 15)”*

40  
41  
42 480  
43  
44  
45

### 3.6 Content unique to HCPs

#### 3.6.1 Institutional/systemic factors

52 483 Some doctors displayed good knowledge of the key information that should  
53  
54 484 be transferred during patient referrals/transfers and/or hospital discharge.

55  
56  
57  
58  
59  
60



1  
2  
3 485 *“To another hospital, yeah first we have to write what are the main complaints*  
4  
5 486 *of patients presenting illness and write about the past history, then we will*  
6  
7 487 *write about what all investigations we have done here ‘til the day of transfer,*  
8  
9 488 *then what is the condition of the patient we are discharging, why we are*  
10  
11 489 *discharging (and) any investigations, major investigations, to be done. (DOC*  
12  
13 490 *2)”*

14  
15  
16  
17  
18 491 However, when asked about training opportunities, numerous doctors  
19  
20 492 mentioned that they had not received any formal handover training. Some recalled  
21  
22 493 that this type of training was not provided at medical school:

23  
24  
25 494 *“I think it was not there in medical curriculum. (DOC 1)”*

26  
27  
28 495 Others reported that training was not provided in their workplace/s and  
29  
30 496 instead they learned on the job:

31  
32  
33 497 *“We are sent to the wards, we see what our seniors do and we do that’s all.*  
34  
35 498 *We have to develop our communication skills ourselves no formal training is*  
36  
37 499 *there. (DOC 14)”*

38  
39  
40  
41 500 When asked about hospital record keeping, a medical records officer stated  
42  
43 501 that inpatient records are stored in hospitals following patient discharge for up to ten  
44  
45 502 years. However, the same officer also indicated that these paper-based records are  
46  
47 503 not easily accessible:

48  
49  
50  
51 504 *“Definitely I can locate any record but it might take some time to locate them.*  
52  
53 505 *(MRO 1)”*

54  
55  
56 506

57  
58  
59 507 **3.6.2 Organisational culture**  
60

1  
2  
3 508 Based on reports from both doctors and nurses, it appeared as though some  
4  
5 509 hierarchical transfer of responsibility for documented handover communication took  
6  
7  
8 510 place in hospitals. For example, a senior doctor mentioned that they instructed  
9  
10 511 medical interns to write notes for them when their patient load was high:

11  
12  
13 512 *“We do write in the papers, whether it’s discharge card or outpatient sheets.*  
14  
15 513 *When patient load is high, then we tell our interns to do it for us, we check that*  
16  
17 514 *and then sign. (DOC 22)”*

18  
19  
20  
21 515

### 22 23 516 **3.6.3 Requirements for improving information exchange**

24  
25  
26  
27 517 During interviews, HCPs were asked for their thoughts on requirements to  
28  
29 518 improve information exchange between HCPs and between HCPs and patients.  
30  
31 519 Numerous doctors felt that there needed to be a notable increase in public  
32  
33  
34 520 healthcare resource provision:

35  
36  
37 521 *“Infrastructure is very small but the outpatient department is ten times more*  
38  
39 522 *than it can manage, so more posts should be created... We have to increase*  
40  
41 523 *the manpower and also our materials. (DOC 15)”*

42  
43  
44 524 Some doctors also discussed the idea of introducing structured referral  
45  
46 525 documents and systems to improve referral communication:

47  
48  
49 526 *“You can supply people with [referral] forms and make it mandatory that*  
50  
51 527 *residents have to maintain a register. In that case they will maintain the*  
52  
53 528 *register. (DOC 3)”*

54  
55  
56  
57 529 In addition, whilst discussing current information systems, one doctor in  
58  
59 530 Kerala reported that an application had been made for a near-future transition to

1  
2  
3 531 computerised healthcare information systems. This appeared to be a state-wide plan  
4  
5 532 for public healthcare facilities:  
6  
7

8 533 *“We have submitted a proposal for paperless computerisation system for*  
9  
10 534 *doctors, so I think state-wide they are planning to do that. (DOC 6)”*  
11  
12

13  
14 535

15  
16  
17 536

## 18 19 20 537 **4. DISCUSSION**

### 21 22 23 24 538 **4.1 Main findings**

25  
26  
27 539 This study presents qualitative data on patient and HCP knowledge, attitudes  
28  
29  
30 540 and barriers to handover and healthcare communication during public hospital  
31  
32 541 inpatient care in Kerala and Himachal Pradesh states, India. The main findings are  
33  
34 542 that verbal and documented information exchange between HCPs and between  
35  
36 543 HCPs and patients is often suboptimal during referrals/transfers, hospital admission  
37  
38 544 and discharge, with a lack of structured systems and HCP education in place to  
39  
40 545 ensure sufficient continuity of care. Whilst unique themes emerged for both patients  
41  
42 546 and HCPs, a comparison of the results from each participant group showed that  
43  
44 547 there was also a notable amount of overlapping content. The results have  
45  
46 548 highlighted the challenging and multifaceted nature of handover and healthcare  
47  
48 549 communication during inpatient care in India. With regard to public health, the  
49  
50 550 findings have also elucidated a number of key areas to address to improve the  
51  
52 551 continuity and safety of chronic NCD patient care.  
53  
54  
55  
56  
57  
58  
59  
60

1  
2  
3 552           Some of the results from the current study reflect and reinforce findings from  
4  
5 553   previous research focussing on outpatient care in the same study areas of India.<sup>20</sup> In  
6  
7 554   particular, during interviews in both studies, patients and HCPs recognised the  
8  
9 555   resource constraints affecting public healthcare. The main issue reported was  
10  
11 556   deficient primary healthcare services, which is in line with well-established findings of  
12  
13 557   limited primary care infrastructure across India and numerous LMICs.<sup>36</sup> In our study  
14  
15 558   settings, under-resourced primary care resulted in many patients preferring to visit  
16  
17 559   hospitals as the first point of care. Subsequently, large patient loads were seen in  
18  
19 560   both outpatient and inpatient departments, which limited HCP consultation times.  
20  
21 561   Other key areas of discussion in the current study reflected in the outpatient findings  
22  
23 562   were inconsistent transportation of patient-held medical documents and views  
24  
25 563   regarding the utility of patient-held booklets. Whilst more inpatients than outpatients  
26  
27 564   reported that they regularly transported records to HCP visits, doctors recalled  
28  
29 565   seeing many patients who did not bring information to the hospital. This was  
30  
31 566   problematic as if patients did not bring their records, then doctors had to gather  
32  
33 567   details from scratch, potentially compromising their continuity of care. When asked  
34  
35 568   about the possible utility of introducing patient-held booklets to store and transport  
36  
37 569   medical documents, inpatients had similar views to outpatients which were generally  
38  
39 570   positive but also felt that the inclusion of self-management information would be  
40  
41 571   beneficial. Doctors in the current study expressed a wider variety of views regarding  
42  
43 572   booklets but broadly thought that they could be useful if patients had positive  
44  
45 573   attitudes towards their maintenance and use.

54 574           Regarding referral communication, the current study also highlighted similar  
55  
56 575   issues of deficient information exchange observed in the previous outpatient study.<sup>20</sup>  
57  
58 576   For example, reports from both HCPs and patients revealed that that documented  
59  
60

1  
2  
3 577 information was often provided in the form of minimal, hand-written notes on papers  
4  
5 578 provided for other purposes (e.g. prescription cards). These findings reflect results  
6  
7 579 from other LMIC studies that have evidenced the exchange of poor-quality referral  
8  
9 580 documents.<sup>14 37-39</sup> However, the current study also evidenced patient reports of not  
10  
11 581 being provided with any documented information during referrals. Further, whilst a  
12  
13 582 small number of inpatient HCPs in the current study explained that they called HCPs  
14  
15 583 to discuss a referral case, this appeared to be dependent on how well they knew the  
16  
17 584 patient or HCP. Such findings indicate that there are further inconsistencies in  
18  
19 585 referral communication practices than previously described. Overall, such deficits are  
20  
21 586 unsurprising given that multiple HCPs in both the current and previous outpatient  
22  
23 587 study reported an absence of structured systems and education provided for  
24  
25 588 handover communication. These findings are also in line with the few previous  
26  
27 589 descriptions from India of an absence of training and protocols for handover  
28  
29 590 practices.<sup>15-17</sup>

30  
31  
32  
33  
34  
35 591 In addition to similarities found with previous research, the current study has  
36  
37 592 elucidated numerous novel insights regarding handover and healthcare  
38  
39 593 communication during critical points in inpatient care, which were previously  
40  
41 594 unexplored in the study areas of India. Regarding inpatient medical record keeping,  
42  
43 595 a records officer reported that hospital records were not easily accessible and rarely  
44  
45 596 retrieved. Alongside the inconsistent transportation of patient-held records, this lack  
46  
47 597 of available medical information carries notable risks for patient safety. This is  
48  
49 598 because, without key patient background and/or treatment details, critical oversights  
50  
51 599 can be made that result in adverse events.<sup>4 5 7</sup> Additionally, there were notable  
52  
53 600 variations in patient reports of the provision of healthcare management information  
54  
55 601 during hospital admission and discharge; whilst some patients reported being given  
56  
57  
58  
59  
60

1  
2  
3 602 clear self-care instructions, others stated that they sought information from external  
4  
5 603 sources due to the lack of detail provided by hospital HCPs. It appears that the time  
6  
7 604 pressures experienced by HCPs were a significant contributory factor to  
8  
9  
10 605 inconsistencies in HCP to patient communication, particularly at the point of  
11  
12 606 discharge. During interviews, senior doctors reported often being so busy with high  
13  
14 607 patient loads that they would pass the duty of writing discharge notes to interns or  
15  
16  
17 608 nurses. Additionally, it seemed that more time was spent on verbal discharge  
18  
19 609 communication, with a nurse reporting that they typically took approximately twenty  
20  
21 610 minutes per patient to explain discharge instructions. Such practices may be  
22  
23 611 compromising the retention of key healthcare information, as global literature  
24  
25 612 suggests that patients can struggle to absorb verbal details provided during  
26  
27  
28 613 consultations.<sup>40</sup> The potential implications of these findings are significant, given  
29  
30 614 the associations that have been found between deficient discharge communication  
31  
32  
33 615 and an increased likelihood of adverse events.<sup>7-10</sup>

34  
35 616 Other key issues affecting handover and healthcare communication during  
36  
37 617 admission and discharge were mentioned solely by each participant group. For  
38  
39 618 patients, some recalled receiving impolite treatment from hospital doctors during  
40  
41  
42 619 admission. Additionally, a small number of patients were dissatisfied with the take-  
43  
44 620 home nutritional advice provided, as they felt it failed to take into account their  
45  
46  
47 621 socioeconomic deprivation. These results may be explained by the reported lack of  
48  
49 622 communication training in medical education, as well as a historic tendency for  
50  
51 623 paternalistic physician conduct in India.<sup>41</sup> In other areas of India and Asia, research  
52  
53 624 on HCP-patient communication has also evidenced asymmetric power balances and  
54  
55  
56 625 patient dissatisfaction during patient consultations.<sup>42</sup> Such findings reveal the need  
57  
58 626 for more patient-centred communication, particularly for poorer patients that make up  
59  
60

1  
2  
3 627 a significant proportion of public healthcare users. As for HCPs, during interviews  
4  
5 628 many doctors recognised the need for an increase in public healthcare resource  
6  
7 629 provision, as well as structured systems for information exchange. Some also  
8  
9  
10 630 discussed the promise of implementing “e-health” systems, with a doctor in Kerala  
11  
12 631 reporting that public healthcare facilities across the state will be transitioning to  
13  
14 632 computerised systems. Whilst our colleagues from Kerala report that this  
15  
16  
17 633 development is in its early stages, it holds potential as similar systems have  
18  
19 634 advanced the accessibility and quality of healthcare information around the world.<sup>43</sup>  
20  
21 635 44  
22

23  
24 636

## 25 26 637 **4.2 Strengths and limitations**

27  
28  
29  
30 638 As far as the authors are aware, this is the first study to qualitatively explore  
31  
32 639 both patient and HCP knowledge, attitudes and barriers to multiple areas of  
33  
34 640 handover and healthcare communication during chronic NCD inpatient care in India.  
35  
36  
37 641 The use of qualitative methodology and inclusion of multiple healthcare sites has  
38  
39 642 revealed a number of key issues that are supported among the HIC and emerging  
40  
41 643 LMIC literature, suggesting likely transferability to other settings. Interviews with both  
42  
43  
44 644 patients and HCPs have provided of a variety of valuable perspectives, which has  
45  
46 645 helped to identify critical areas impacting the continuity of chronic NCD inpatient  
47  
48 646 care. The number of interviews conducted helped to achieve data saturation for both  
49  
50 647 participant groups and study credibility was strengthened via the use of multi-analyst  
51  
52  
53 648 triangulation.<sup>34</sup>  
54

55  
56 649 The lack of documented inclusion/exclusion rates for participation is a  
57  
58 650 limitation, as this could not be recorded. In addition, the accuracy of recall of the  
59  
60

1  
2  
3 651 minority of patients interviewed at home may have been limited by the delay  
4  
5 652 between recruitment and data collection. Recruitment challenges meant that patient  
6  
7 653 participants were predominantly older (i.e. 45yrs+), which limited exploration of  
8  
9 654 younger patient experiences; this was, however, largely unsurprising given the study  
10  
11 655 exclusively recruited patients with chronic NCDs. The cross-cultural nature of this  
12  
13 656 research may have resulted in constraints during data collection and analysis, as in-  
14  
15 657 group bias could have affected participants' willingness to openly converse with a  
16  
17 658 non-local researcher.<sup>45</sup> Social desirability bias from the use of individual interviews  
18  
19 659 and participant's awareness that the interviewer was a public health professional  
20  
21 660 may have also affected truthfulness of the data.<sup>46</sup> Despite these challenges, the  
22  
23 661 recurrence of themes indicating data saturation and the finding that our results are  
24  
25 662 supported by existing literature suggests that they had minimal impact.  
26  
27  
28  
29  
30  
31  
32  
33

### 34 664 **4.3 Conclusions and next steps**

35  
36  
37  
38 665 This study has found that handover and healthcare communication for chronic  
39  
40 666 NCD inpatients during referrals/transfers, hospital admission and discharge is often  
41  
42 667 fragmented. The critical barriers appear to be an absence of structured information  
43  
44 668 exchange systems and HCP education. There is also a growing recognition of the  
45  
46 669 need for the government to strengthen primary healthcare infrastructure in line with  
47  
48 670 the declaration of Alma Alta.<sup>47</sup> This will greatly assist in increasing accessibility of  
49  
50 671 care and subsequently reducing pressure on hospital services. It will also be  
51  
52 672 required to address the United Nations' sustainable development goals regarding  
53  
54 673 universal health coverage and reducing premature deaths from NCDs.<sup>48</sup> In addition,  
55  
56 674 the implementation of structured documentation, systems and training is urgently  
57  
58  
59  
60



1  
2  
3 675 required to manage critical care transitions such as referral and discharge. Research  
4  
5 676 from both HIC and LMIC settings has proven that such interventions can improve  
6  
7 677 continuity and safety of care.<sup>4 17 37 49</sup> Regarding future steps, during HCP interviews it  
8  
9 678 was reported that public healthcare facilities in Kerala will be transitioning to  
10  
11 679 computerised “e-health” information systems. The Indian government has also since  
12  
13 680 pledged to digitise all public healthcare information systems in the country via an  
14  
15 681 “Integrated Health Information Platform”.<sup>50</sup> Whilst such developments hold promise  
16  
17 682 and are progressing in Kerala, they remain in their initial stages in many states and  
18  
19 683 face numerous infrastructural challenges. Additionally, they are not likely to target  
20  
21 684 issues regarding HCP to patient communication, patient access to healthcare  
22  
23 685 information and information exchange between public and private healthcare  
24  
25 686 providers.

26  
27  
28  
29  
30  
31 687 Therefore, a mixed-methods pilot study exploring the design and  
32  
33 688 implementation of patient-held record booklets is suggested. This could ameliorate  
34  
35 689 some of the current issues by incorporating disease-specific and structured  
36  
37 690 documents, which have been shown to improve the recording of clinical information  
38  
39 691 and can provide a means of organising records in a logical and accessible way.<sup>49 51</sup>  
40  
41 692 <sup>52</sup> The patient-held nature of this strategy could also increase patient access to key  
42  
43 693 healthcare information, which may improve self-management. Given the  
44  
45 694 unstructured, predominantly paper-based systems utilised across the study sites,  
46  
47 695 this is an area for development that has been welcomed by Indian national and  
48  
49 696 international experts, as well as by patients and HCPs in our study areas. There  
50  
51 697 have also been multiple international successes of improved continuity of care via  
52  
53 698 utilisation of similar patient-held/home-based records in both outpatient and maternal  
54  
55 699 and child healthcare.<sup>26-30 53</sup> In order to maximise booklet utilisation, it would be  
56  
57  
58  
59  
60

1  
2  
3 700 necessary to address the issues surrounding patient retention and understanding of  
4  
5 701 the importance of medical documents. Initial key steps could be to involve both  
6  
7 702 patients and HCPs in the design process and accompany the introduction of  
8  
9 703 booklets with relevant promotion, training and incentives.  
10  
11  
12

13 704 Finally, given the rising burden of NCDs across LMICs, this research is timely  
14  
15 705 and crucial for effective health systems development. It is vital that further LMIC  
16  
17 706 research is conducted to explore critical factors affecting handover, continuity of care  
18  
19 707 and health systems integration and to develop sustainable and cost-effective  
20  
21 708 interventions.  
22  
23  
24

25 709  
26  
27

28 710  
29  
30

## 31 711 **ACKNOWLEDGEMENTS**

32  
33  
34  
35 712 This research was supported by the National Institute for Health Research  
36  
37 713 (NIHR) Collaboration for Leadership in Applied Health Research and Care West  
38  
39 714 Midlands (NIHR CLAHRC WM). We would like to extend our thanks to all patients,  
40  
41 715 healthcare staff and researchers who kindly took the time to participate in this  
42  
43 716 project. We are also indebted and give thanks to the participating hospitals and  
44  
45 717 community healthcare facilities. Finally, we are very grateful to the Directors of  
46  
47 718 Health from both Himachal Pradesh and Kerala States, India, for their assistance in  
48  
49 719 facilitating this project. This research would not have been possible without their  
50  
51 720 support.  
52  
53  
54  
55

56 721  
57  
58

59 722  
60

## 723 **AUTHOR CONTRIBUTIONS**

724 In order of the author list: CH: Data curation, formal analysis, visualisation,  
725 writing (both original draft and final review and editing). SJ: Investigation, data  
726 curation, project administration, writing (review and editing). JP: Conceptualisation,  
727 funding acquisition, project administration, supervision, writing (review and editing).  
728 SS: Funding acquisition, project administration, supervision, writing (review and  
729 editing). SG(oenka): Funding acquisition, projection administration, supervision,  
730 writing (review and editing). PD: Conceptualisation, funding acquisition, project  
731 administration, supervision, writing (review and editing). PG: Conceptualisation, data  
732 curation, funding acquisition, writing (review and editing). SG(reenfield): Funding  
733 acquisition, formal analysis, writing (review and editing). RL: Conceptualisation,  
734 funding acquisition, writing (review and editing). SMH: Conceptualisation, funding  
735 acquisition, investigation, methodology, project administration, supervision, writing  
736 (review and editing).

737

738

## 739 **FUNDING STATEMENT**

740 This research was joint-funded by the Department of International  
741 Development, the Economic and Social Research Council, the Medical Research  
742 Council and the Wellcome Trust; grant number: MR/M00287X/1. The funders had no  
743 role in study design, conduct or reporting.

744

1  
2  
3 745  
4  
56 746 **COMPETING INTERESTS STATEMENT**8  
9  
10 747 The authors of this manuscript have no competing interests to disclose.  
11  
1213  
14 748  
15  
1617  
18 749  
19  
2021  
22 750 **ETHICS APPROVAL**23  
24  
25 751 This study was reviewed and approved by the Centre for Chronic Disease  
26  
27 752 Control Independent Ethics Committee, India, and the Amrita Institute of Medical  
28  
29 753 Sciences Institutional Ethics Committee, India. Data archives will be stored at the  
30  
31 754 University of Birmingham, in accordance with the University's code of practice.  
32  
3334  
35 755  
36  
3738 756  
39  
4041  
42 757 **DATA SHARING STATEMENT**43  
44  
45 758 De-identified participant transcript data generated and analysed during the  
46  
47 759 current study are available from the corresponding author on reasonable request.  
48  
4950 760 Contact Details: Dr. Semira Manaseki-Holland, s.manasekiholland@bham.ac.uk.  
51  
5253  
54 761  
55  
5657 762  
58  
59

60 763

## 764 REFERENCES

- 765 1. Islam SMS, Purnat TD, Phuong NTA, et al. Non-Communicable Diseases (NCDs) in developing  
766 countries: a symposium report. *Globalization and health* 2014;10(1):81.
- 767 2. World Health Organisation. Communication during patient hand-overs. *Patient safety solutions*  
768 2007;1(3):1-4.
- 769 3. British Medical Association. Safe handover: safe patients. *Guidance on clinical handover for*  
770 *clinicians and managers London: BMA* 2004;7:141.
- 771 4. Merten H, van Galen LS, Wagner C. Safe handover. *Bmj* 2017;359:j4328. doi:  
772 <https://dx.doi.org/10.1136/bmj.j4328>
- 773 5. Australian Council for Safety Quality in Health Care. Clinical handover and patient safety:  
774 Literature review report. 2005
- 775 6. Hesselink G, Schoonhoven L, Barach P, et al. Improving patient handovers from hospital to primary  
776 care: a systematic review. *Ann Intern Med* 2012;157(6):417-28. doi:  
777 <https://dx.doi.org/10.7326/0003-4819-157-6-201209180-00006>
- 778 7. Forster AJ, Murff HJ, Peterson JF, et al. The incidence and severity of adverse events affecting  
779 patients after discharge from the hospital. *Ann Intern Med* 2003;138(3):161-7.
- 780 8. Moore C, Wisnivesky J, Williams S, et al. Medical errors related to discontinuity of care from an  
781 inpatient to an outpatient setting. *J Gen Intern Med* 2003;18(8):646-51.
- 782 9. Li JY, Yong TY, Hakendorf P, et al. Timeliness in discharge summary dissemination is associated  
783 with patients' clinical outcomes. *Journal of evaluation in clinical practice* 2013;19(1):76-79.
- 784 10. van Walraven C, Seth R, Austin PC, et al. Effect of discharge summary availability during post-  
785 discharge visits on hospital readmission. *J Gen Intern Med* 2002;17(3):186-92.
- 786 11. Bradley S, Mott S. Adopting a patient-centred approach: an investigation into the introduction of  
787 bedside handover to three rural hospitals. *J Clin Nurs* 2014;23(13-14):1927-36. doi:  
788 <https://dx.doi.org/10.1111/jocn.12403>
- 789 12. Humphries C, Majothi S, Krynicki C, et al. Handover communication in low and middle-income  
790 countries: A systematic review PROSPERO international prospective register of systematic  
791 reviews2019 [Available from:  
792 [https://www.crd.york.ac.uk/prospéro/display\\_record.php?RecordID=9309](https://www.crd.york.ac.uk/prospéro/display_record.php?RecordID=9309).
- 793 13. Dreyer R, Viljoen AJ. Evaluation of factors and patterns influencing the 30-day readmission rate  
794 at a tertiary-level hospital in a resource-constrained setting in Cape Town, South Africa.  
795 *South African Medical Journal Suid-Afrikaanse Tydskrif Vir Geneeskunde* 2019;109(3):164-68.
- 796 14. Azim A, Bhatia P, Baronia A, et al. Deficits in referral notes during inter-hospital transfers of  
797 critically ill patients: an observational study from a developing nation. *International Journal*  
798 *of Perioperative Ultrasound & Applied Technologies* 2013;2(2):89.
- 799 15. Kumar P, Jithesh V, Vij A, et al. Who is more hands on with hand-offs? A comparative study of  
800 clinical handovers among doctors and nurses in a tertiary care center in India. *International*  
801 *Journal of Research Foundation of Hospital & Healthcare Administration* 2015;3(1):33-40.
- 802 16. Kumar P, Jithesh V, Vij A, et al. Need for a hands-on approach to hand-offs: A study of nursing  
803 handovers in an Indian Neurosciences Center. *Asian journal of neurosurgery* 2016;11(1):54.
- 804 17. Rajavelu P, Rajagopalan A. Pre-formatted written discharge summary—a step towards quality  
805 assurance in the emergency department. *International journal of emergency medicine*  
806 2008;1(4):321-25.
- 807 18. Kumar S. Assessment of quality of handwritten discharge tickets of breast cancer patients: The  
808 gaps are wide and need remedy. 2004
- 809 19. Saxena M, Srivastava A, Dwivedi P, et al. Is quality of care during childbirth consistent from  
810 admission to discharge? A qualitative study of delivery care in Uttar Pradesh, India. *PLoS*  
811 *ONE [Electronic Resource]* 2018;13(9):e0204607.

- 1  
2  
3 812 20. Humphries C, Jaganathan S, Panniyammakal J, et al. Investigating clinical handover and  
4 813 healthcare communication for outpatients with chronic disease in India: A mixed-methods  
5 814 study. *PLoS ONE [Electronic Resource]* 2018;13(12):e0207511.  
6  
7 815 21. Marshall MN. Sampling for qualitative research. *Fam Pract* 1996;13(6):522-26.  
8 816 22. Palys T. Purposive Sampling. In: Given LM, ed. *The Sage Encyclopedia of Qualitative Research*  
9 817 *Methods*. Los Angeles: Sage 2008:697-98.  
10 818 23. World Health Organization. Information for Researchers Concerning Informed Decision Making  
11 819 [Internet]. Available from:  
12 820 [http://www.who.int/rpc/research\\_ethics/Process\\_seeking\\_IF\\_printing2.pdf](http://www.who.int/rpc/research_ethics/Process_seeking_IF_printing2.pdf) accessed  
13 821 01/05/18.  
14 822 24. Seale C. Quality in qualitative research. *Qualitative inquiry* 1999;5(4):465-78.  
15 823 25. Baker SE, Edwards R, Doidge M. How many qualitative interviews is enough?: Expert voices and  
16 824 early career reflections on sampling and cases in qualitative research. 2012  
17 825 26. Shah PM, Selwyn BJ, Shah K, et al. Evaluation of the home-based maternal record: a WHO  
18 826 collaborative study. *Bull World Health Organ* 1993;71(5):535-48.  
19 827 27. Osaki K, Hattori T, Kosen S. The role of home-based records in the establishment of a continuum  
20 828 of care for mothers, newborns, and children in Indonesia. *Glob Health Action* 2013;6:1-12.  
21 829 doi: <https://dx.doi.org/10.3402/gha.v6i0.20429>  
22 830 28. Turner KE, Fuller S. Patient-held maternal and/or child health records: meeting the information  
23 831 needs of patients and healthcare providers in developing countries? *Online journal of public*  
24 832 *health informatics* 2011;3(2)  
25 833 29. Takeuchi J, Sakagami Y, Perez RC. The Mother and Child Health handbook in Japan as a health  
26 834 promotion tool: An overview of its history, contents, use, benefits, and global influence.  
27 835 *Global pediatric health* 2016;3:2333794X16649884.  
28 836 30. Walton S, Bedford H, Dezateux C. Use of personal child health records in the UK: findings from  
29 837 the millennium cohort study. *Bmj* 2006;332(7536):269-70.  
30 838 31. Spencer L, Ritchie J. Qualitative data analysis for applied policy research. Analyzing qualitative  
31 839 data: Routledge 2002:187-208.  
32 840 32. Braun V, Clarke V. Using thematic analysis in psychology. *Qualitative research in psychology*  
33 841 2006;3(2):77-101.  
34 842 33. Corbin JM, Strauss A. Grounded theory research: Procedures, canons, and evaluative criteria.  
35 843 *Qualitative sociology* 1990;13(1):3-21.  
36 844 34. Lincoln YS, Guba EG. *Naturalistic inquiry*. Beverly Hills: ca: sage, 1985.  
37 845 35. Gale NK, Heath G, Cameron E, et al. Using the framework method for the analysis of qualitative  
38 846 data in multi-disciplinary health research. *BMC medical research methodology*  
39 847 2013;13(1):117.  
40 848 36. Das J, Hammer J. Quality of primary care in low-income countries: facts and economics. *Annu Rev*  
41 849 *Econ* 2014;6(1):525-53.  
42 850 37. Janati A, Amini A, Adham D, et al. Assessing the quality of referral letters written by general  
43 851 practitioners: a cross-sectional study in rural Iran. *Cadernos de Saude Publica*  
44 852 2017;33(2):e00043016.  
45 853 38. Gyedu A, Baah EG, Boakye G, et al. Quality of referrals for elective surgery at a tertiary care  
46 854 hospital in a developing country: an opportunity for improving timely access to and cost-  
47 855 effectiveness of surgical care. *Int J Surg* 2015;15:74-8. doi:  
48 856 <https://dx.doi.org/10.1016/j.ijvsu.2015.01.033>  
49 857 39. Osinaike BO, Esezobor CI, Akinsola OJ. Quality of Referral Letters to the Paediatric Department of  
50 858 a Tertiary Hospital in Nigeria. *Nigerian Quarterly Journal of Hospital Medicine*  
51 859 2013;23(4):273-9.  
52 860 40. Kessels RP. Patients' memory for medical information. *Journal of the Royal Society of Medicine*  
53 861 2003;96(5):219-22.  
54  
55  
56  
57  
58  
59  
60

- 1  
2  
3 862 41. Ghooi R, Deshpande S. Patients' rights in India: an ethical perspective. *Indian J Med Ethics*  
4 863 2012;9(277):e8.  
5 864 42. Pun J, Chan EA, Wang S, et al. Health professional-patient communication practices in East Asia:  
6 865 An integrative review of an emerging field of research and practice in Hong Kong, South  
7 866 Korea, Japan, Taiwan, and Mainland China. *Patient education and counseling* 2018  
8 867 43. Piette JD, Lun KC, Moura LA, Jr., et al. Impacts of e-health on the outcomes of care in low- and  
9 868 middle-income countries: where do we go from here? *Bull World Health Organ*  
10 869 2012;90(5):365-72. doi: <https://dx.doi.org/10.2471/BLT.11.099069>  
11 870 44. Campanella P, Lovato E, Marone C, et al. The impact of electronic health records on healthcare  
12 871 quality: a systematic review and meta-analysis. *Eur J Public Health* 2016;26(1):60-4. doi:  
13 872 <https://dx.doi.org/10.1093/eurpub/ckv122>  
14 873 45. Tajfel H. Social psychology of intergroup relations. *Annual review of psychology* 1982;33(1):1-39.  
15 874 46. Spector P. Social desirability bias. *Encyclopedia of social science research methods* 2004:1045-46.  
16 875 47. World Health Organization. Declaration of Alma-Ata: International Conference on Primary Health  
17 876 Care, Alma-Ata, USSR, 6–12 September 1978. Retrieved February 1978;14:2006.  
18 877 48. United Nations. Sustainable Development Goals. [Internet]. Available from:  
19 878 <https://www.un.org/sustainabledevelopment/sustainable-development-goals/2018>.  
20 879 49. Ramanayake R. Structured printed referral letter (form letter); saves time and improves  
21 880 communication. *Journal of family medicine and primary care* 2013;2(2):145.  
22 881 50. Government of India - Press Information Bureau. Health Ministry launches a new state-of-the art  
23 882 Information Platform to monitor public health surveillance 2018 [Available from:  
24 883 <http://pib.nic.in/PressReleaselframePage.aspx?PRID=1553941> accessed 01/01/2019 2019.  
25 884 51. Doyle M-A, Malcolm JC, Liu D, et al. Using a structured discharge letter template to improve  
26 885 communication during the transition from a specialized outpatient diabetes clinic to a  
27 886 primary care physician. *Canadian journal of diabetes* 2015;39(6):457-66.  
28 887 52. Lilford RJ, Kelly M, Baines A, et al. Effect of using protocols on medical care: randomised trial of  
29 888 three methods of taking an antenatal history. *Bmj* 1992;305(6863):1181-4.  
30 889 53. Ibrahim H, Munkhbayar U, Toivgoo A, et al. Can universal patient-held health booklets promote  
31 890 continuity of care and patient-centred care in low-resource countries? The case of Mongolia.  
32 891 *BMJ Qual Saf* 2019:bmjqs-2018-008941.

33  
34  
35  
36  
37  
38  
39  
40  
41  
42  
43  
44  
45  
46  
47  
48  
49  
50  
51  
52  
53  
54  
55  
56  
57  
58  
59  
60

Figure 1. Similarities and differences between the content of patient & HCP data with related subcategories

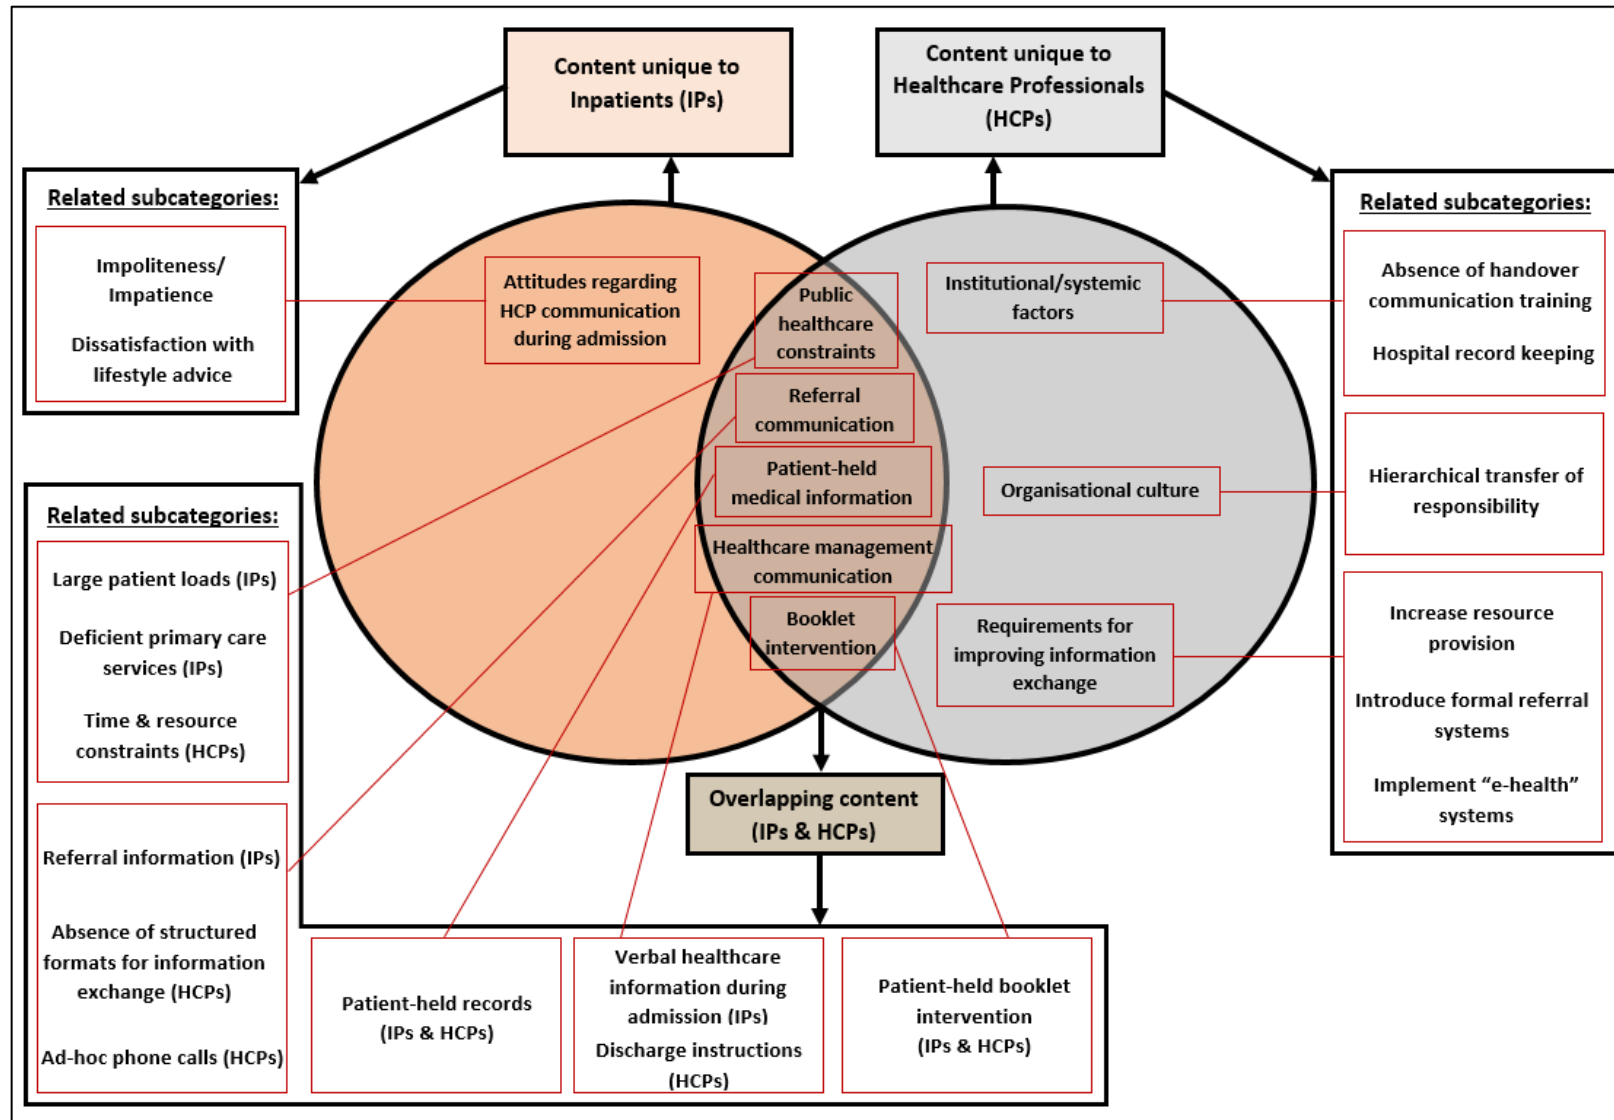



# S1. Additional information regarding the Indian healthcare system

## 1. National context: structure of public healthcare system

The basic structure of the public healthcare system in India is as follows:<sup>1</sup>

- National level: Ministry of Health and Family Welfare.
- State-level: State Department of Health and Family welfare in each state.
- Regional level: covers 3 - 5 districts. Headed by State Directorate of Health.
- District level: Middle-level management organisation serving as a link between the regional and state structures and the peripheral and PHC structures.
- Sub-divisional/Taluk level: Hospitals/hospitals with specialty care (Taluk headquarters hospitals). Healthcare services are rendered via the office of Assistant District Health and Family Welfare Officer.
- Community level: CHCs that cater for 80,000-120,000 population and PHCs that cover approximately 20,000 – 30,000 population.

## 2. Public healthcare in India

The quality of public healthcare across India varies notably between states and urban and rural areas. Whilst there are some examples of excellence in a select few states, generally the public sector is generally failing to meet the basic healthcare needs of the growing population. Services being too far away, a lack of trained personnel, deficient medical supplies and limited facility opening times are some of the principal reasons for current shortfalls.<sup>2</sup> Regarding primary health

1  
2  
3 centres, government estimates have indicated that up to 10% are without a doctor,  
4  
5 37% are without a laboratory technician and 25% are without a pharmacist.<sup>3</sup> These  
6  
7 issues appear to be particularly prevalent within socioeconomically vulnerable areas,  
8  
9 where facilities have been reported to lack essential medical supplies and are closed  
10  
11 more than 50% of the time. In addition, public healthcare facilities are often the sole  
12  
13 source of qualified healthcare professionals in rural areas, which is where many of  
14  
15 the most socioeconomically vulnerable live.<sup>2</sup>  
16  
17  
18  
19  
20  
21  
22

### 23 **3. Private healthcare in India**

24  
25 Due to a lack of prioritisation from economic planners, public healthcare in  
26  
27 India has lacked funding over multiple decades. Therefore, the increasing  
28  
29 prevalence of chronic diseases, as well as ongoing challenges of infectious  
30  
31 diseases, has placed an enormous strain on public health systems that cannot be  
32  
33 feasibly managed. Subsequently, the private healthcare sector has proliferated to  
34  
35 meet the rising needs, expectations and earnings of the growing population. So  
36  
37 much so in fact, that surveys now show that private providers dominate healthcare  
38  
39 service provision in India.<sup>2</sup>  
40  
41  
42  
43

44 At the top end of the market, the private healthcare sector has grown  
45  
46 extensively and now has world-class facilities. Private hospital care has become an  
47  
48 export sector for medical tourism that cares for around 200,000 international patients  
49  
50 each year.<sup>4</sup> However, private healthcare providers lack regulation and quality  
51  
52 remains inconsistent across facilities. In many cases private facilities deliver services  
53  
54 without appropriate equipment or expertise and, although it is preferential for many  
55  
56 to visit private providers, high out-of-pocket costs are often incurred. It has been  
57  
58 reported that more than 40% of private hospital patients have to sell assets or  
59  
60

1  
2  
3 borrow money to fund their care.<sup>5</sup> This means that many patients of lower  
4  
5 socioeconomic status remain unable to access such care, while others fall further  
6  
7 into poverty as a result of expenses.  
8  
9  
10  
11  
12  
13  
14  
15  
16

## 17 REFERENCES

- 20 1. Care Continuum Alliance, India. India – Health Care System Structure and  
21 Organization. 2009. Available from:  
22 [http://dmaa.pbworks.com/w/page/17960772/India%20-](http://dmaa.pbworks.com/w/page/17960772/India%20-%20Health%20Care%20System%20Structure%20and%20Organization)  
23 [%20Health%20Care%20System%20Structure%20and%20Organization](http://dmaa.pbworks.com/w/page/17960772/India%20-%20Health%20Care%20System%20Structure%20and%20Organization)  
24  
25
- 26 2. Joumard I, Kumar A. Improving health outcomes and health care in India.  
27 Paris: Organisation for Economic Cooperation and Development (OECD)  
28 Working Papers, No. 1184, OECD Publishing. 2015. Available from:  
29 [http://www.oecd-ilibrary.org/economics/improving-health-outcomes-and-](http://www.oecd-ilibrary.org/economics/improving-health-outcomes-and-health-care-in-india_5js7t9ptcr26-en)  
30 [health-care-in-india\\_5js7t9ptcr26-en](http://www.oecd-ilibrary.org/economics/improving-health-outcomes-and-health-care-in-india_5js7t9ptcr26-en)  
31  
32
- 33 3. Ministry of Health and Family Welfare, Government of India. Rural  
34 Health Statistics in India. 2012. Available from:  
35 [https://nrhm.gujarat.gov.in/images/pdf/publications/RHS\\_2012.pdf](https://nrhm.gujarat.gov.in/images/pdf/publications/RHS_2012.pdf)  
36  
37
- 38 4. Lunt N, Smith R, Exworthy M, Green S, Horsfall D, Mannion R. Medical  
39 Tourism: Treatments, Markets and Health System Implications: a  
40 Scoping Review. OECD Publishing. 2010. Available from: Paris  
41 <http://www.oecd.org/els/health-systems/48723982.pdf>  
42  
43
- 44 5. The World Bank - Health, Nutrition, Population Sector Unit India South Asian  
45 Region. Raising the sights: better health systems for India's poor. Available  
46 from: <https://openknowledge.worldbank.org/handle/10986/14080>  
47  
48  
49  
50  
51  
52  
53  
54  
55  
56  
57  
58  
59  
60

## S2. Additional information regarding the study settings

### 1. Himachal Pradesh

Himachal Pradesh is principally a rural state in northern India. It has a population of 6.86 million people and the average literacy rate is 83.3%, which is higher than the national average (74%). However, rates remain notably lower for women compared to men (76.6% vs. 90.8%, respectively).<sup>6</sup> Private HCPs are less prevalent in Himachal Pradesh compared to many states and utilisation of public healthcare remains relatively high.<sup>7</sup> A recent study found that the availability of public health services in the state was deemed adequate as compared to standards of other hill states, but with an unequal distribution of resources across regions.<sup>8</sup>

### 2. Kerala

Kerala state is in the south-west of India. It has a population of 34.8 million people and a greater than national average urban-based population of 47.7%. It has the highest overall literacy rate of all the states in India (93.9%; men 96.1%, women 92.1%).<sup>9</sup> There are a relatively large number of government healthcare facilities in Kerala but the healthcare environment has become increasingly complex due to the growing popularity and presence of private healthcare facilities, which are predominantly situated in urban settings. Despite this, public healthcare facilities in Kerala remain the first point of care for many patients and continue to deliver essential services.<sup>10</sup>

## REFERENCES

6. Government of India. Himachal Pradesh Population Census Data 2011 [Internet]. Available from: <https://www.census2011.co.in/census/state/himachal+pradesh.html> accessed 13/06/18 2017.
7. Government of India. Himachal Pradesh Development Report. New Delhi: Academic Foundation, 2005.
8. Suman.; Bhutani S. Availability of health services in Himachal Pradesh *International Journal of Advanced Research and Development* 2017;2(6):231-38.
9. Government of Kerala. Kerala Population Census Data 2011 [Internet]. Available from: <https://www.census2011.co.in/census/state/kerala.html> accessed 13/06/18.
10. Government of Kerala. Kerala Development Report. New Delhi: Academic Foundation, 2008.

# Reporting checklist for qualitative study.

Based on the SRQR guidelines.

## Instructions to authors

Complete this checklist by entering the page numbers from your manuscript where readers will find each of the items listed below.

Your article may not currently address all the items on the checklist. Please modify your text to include the missing information. If you are certain that an item does not apply, please write "n/a" and provide a short explanation.

Upload your completed checklist as an extra file when you submit to a journal.

In your methods section, say that you used the SRQR reporting guidelines, and cite them as:

O'Brien BC, Harris IB, Beckman TJ, Reed DA, Cook DA. Standards for reporting qualitative research: a synthesis of recommendations. Acad Med. 2014;89(9):1245-1251.

|    | Reporting Item                                                                                                                                                                                                                       | Page Number |
|----|--------------------------------------------------------------------------------------------------------------------------------------------------------------------------------------------------------------------------------------|-------------|
| #1 | Concise description of the nature and topic of the study identifying the study as qualitative or indicating the approach (e.g. ethnography, grounded theory) or data collection methods (e.g. interview, focus group) is recommended | 1           |
| #2 | Summary of the key elements of the study using the abstract format of the intended publication; typically                                                                                                                            | 2-3         |

|    |                       |    |                                                           |      |
|----|-----------------------|----|-----------------------------------------------------------|------|
| 1  |                       |    | includes background, purpose, methods, results and        |      |
| 2  |                       |    |                                                           |      |
| 3  |                       |    | conclusions                                               |      |
| 4  |                       |    |                                                           |      |
| 5  |                       |    |                                                           |      |
| 6  | Problem formulation   | #3 | Description and significance of the problem /             | 5-7  |
| 7  |                       |    |                                                           |      |
| 8  |                       |    | phenomenon studied: review of relevant theory and         |      |
| 9  |                       |    |                                                           |      |
| 10 |                       |    | empirical work; problem statement                         |      |
| 11 |                       |    |                                                           |      |
| 12 |                       |    |                                                           |      |
| 13 | Purpose or research   | #4 | Purpose of the study and specific objectives or           | 6-7  |
| 14 | question              |    | questions                                                 |      |
| 15 |                       |    |                                                           |      |
| 16 |                       |    |                                                           |      |
| 17 |                       |    |                                                           |      |
| 18 |                       |    |                                                           |      |
| 19 | Qualitative approach  | #5 | Qualitative approach (e.g. ethnography, grounded          | 6-12 |
| 20 | and research paradigm |    | theory, case study, phenomenology, narrative research)    |      |
| 21 |                       |    | and guiding theory if appropriate; identifying the        |      |
| 22 |                       |    | research paradigm (e.g. postpositivist, constructivist /  |      |
| 23 |                       |    | interpretivist) is also recommended; rationale. The       |      |
| 24 |                       |    | rationale should briefly discuss the justification for    |      |
| 25 |                       |    | choosing that theory, approach, method or technique       |      |
| 26 |                       |    | rather than other options available; the assumptions      |      |
| 27 |                       |    | and limitations implicit in those choices and how those   |      |
| 28 |                       |    | choices influence study conclusions and transferability.  |      |
| 29 |                       |    | As appropriate the rationale for several items might be   |      |
| 30 |                       |    | discussed together.                                       |      |
| 31 |                       |    |                                                           |      |
| 32 |                       |    |                                                           |      |
| 33 |                       |    |                                                           |      |
| 34 |                       |    |                                                           |      |
| 35 |                       |    |                                                           |      |
| 36 |                       |    |                                                           |      |
| 37 |                       |    |                                                           |      |
| 38 |                       |    |                                                           |      |
| 39 |                       |    |                                                           |      |
| 40 |                       |    |                                                           |      |
| 41 |                       |    |                                                           |      |
| 42 |                       |    |                                                           |      |
| 43 |                       |    |                                                           |      |
| 44 |                       |    |                                                           |      |
| 45 |                       |    |                                                           |      |
| 46 |                       |    |                                                           |      |
| 47 | Researcher            | #6 | Researchers' characteristics that may influence the       | 6-12 |
| 48 | characteristics and   |    | research, including personal attributes, qualifications / |      |
| 49 | reflexivity           |    | experience, relationship with participants, assumptions   |      |
| 50 |                       |    | and / or presuppositions; potential or actual interaction |      |
| 51 |                       |    | between researchers' characteristics and the research     |      |
| 52 |                       |    |                                                           |      |
| 53 |                       |    |                                                           |      |
| 54 |                       |    |                                                           |      |
| 55 |                       |    |                                                           |      |
| 56 |                       |    |                                                           |      |
| 57 |                       |    |                                                           |      |
| 58 |                       |    |                                                           |      |
| 59 |                       |    |                                                           |      |
| 60 |                       |    |                                                           |      |

|    |                           |                                                             |       |
|----|---------------------------|-------------------------------------------------------------|-------|
| 1  |                           | questions, approach, methods, results and / or              |       |
| 2  |                           | transferability                                             |       |
| 3  |                           |                                                             |       |
| 4  |                           |                                                             |       |
| 5  |                           |                                                             |       |
| 6  | Context                   | #7 Setting / site and salient contextual factors; rationale | 7     |
| 7  |                           |                                                             |       |
| 8  |                           |                                                             |       |
| 9  | Sampling strategy         | #8 How and why research participants, documents, or         | 7     |
| 10 |                           | events were selected; criteria for deciding when no         |       |
| 11 |                           | further sampling was necessary (e.g. sampling               |       |
| 12 |                           | saturation); rationale                                      |       |
| 13 |                           |                                                             |       |
| 14 |                           |                                                             |       |
| 15 |                           |                                                             |       |
| 16 |                           |                                                             |       |
| 17 |                           |                                                             |       |
| 18 |                           |                                                             |       |
| 19 | Ethical issues pertaining | #9 Documentation of approval by an appropriate ethics       | 37    |
| 20 | to human subjects         | review board and participant consent, or explanation for    |       |
| 21 |                           | lack thereof; other confidentiality and data security       |       |
| 22 |                           | issues                                                      |       |
| 23 |                           |                                                             |       |
| 24 |                           |                                                             |       |
| 25 |                           |                                                             |       |
| 26 |                           |                                                             |       |
| 27 |                           |                                                             |       |
| 28 |                           |                                                             |       |
| 29 | Data collection methods   | #10 Types of data collected; details of data collection     | 6-12  |
| 30 |                           | procedures including (as appropriate) start and stop        |       |
| 31 |                           | dates of data collection and analysis, iterative process,   |       |
| 32 |                           | triangulation of sources / methods, and modification of     |       |
| 33 |                           | procedures in response to evolving study findings;          |       |
| 34 |                           | rationale                                                   |       |
| 35 |                           |                                                             |       |
| 36 |                           |                                                             |       |
| 37 |                           |                                                             |       |
| 38 |                           |                                                             |       |
| 39 |                           |                                                             |       |
| 40 |                           |                                                             |       |
| 41 |                           |                                                             |       |
| 42 |                           |                                                             |       |
| 43 | Data collection           | #11 Description of instruments (e.g. interview guides,      | 6-12  |
| 44 | instruments and           | questionnaires) and devices (e.g. audio recorders) used     |       |
| 45 | technologies              | for data collection; if / how the instruments(s) changed    |       |
| 46 |                           | over the course of the study                                |       |
| 47 |                           |                                                             |       |
| 48 |                           |                                                             |       |
| 49 |                           |                                                             |       |
| 50 |                           |                                                             |       |
| 51 |                           |                                                             |       |
| 52 |                           |                                                             |       |
| 53 | Units of study            | #12 Number and relevant characteristics of participants,    | 14-17 |
| 54 |                           | documents, or events included in the study; level of        |       |
| 55 |                           | participation (could be reported in results)                |       |
| 56 |                           |                                                             |       |
| 57 |                           |                                                             |       |
| 58 |                           |                                                             |       |
| 59 |                           |                                                             |       |
| 60 |                           |                                                             |       |



|    |                         |     |                                                             |       |
|----|-------------------------|-----|-------------------------------------------------------------|-------|
| 1  | Data processing         | #13 | Methods for processing data prior to and during             | 12-13 |
| 2  |                         |     |                                                             |       |
| 3  |                         |     |                                                             |       |
| 4  |                         |     | analysis, including transcription, data entry, data         |       |
| 5  |                         |     |                                                             |       |
| 6  |                         |     | management and security, verification of data integrity,    |       |
| 7  |                         |     |                                                             |       |
| 8  |                         |     | data coding, and anonymisation / deidentification of        |       |
| 9  |                         |     |                                                             |       |
| 10 |                         |     | excerpts                                                    |       |
| 11 |                         |     |                                                             |       |
| 12 |                         |     |                                                             |       |
| 13 | Data analysis           | #14 | Process by which inferences, themes, etc. were              | 12-13 |
| 14 |                         |     |                                                             |       |
| 15 |                         |     | identified and developed, including the researchers         |       |
| 16 |                         |     |                                                             |       |
| 17 |                         |     | involved in data analysis; usually references a specific    |       |
| 18 |                         |     |                                                             |       |
| 19 |                         |     | paradigm or approach; rationale                             |       |
| 20 |                         |     |                                                             |       |
| 21 |                         |     |                                                             |       |
| 22 |                         |     |                                                             |       |
| 23 | Techniques to enhance   | #15 | Techniques to enhance trustworthiness and credibility       | 12-13 |
| 24 |                         |     |                                                             |       |
| 25 | trustworthiness         |     | of data analysis (e.g. member checking, audit trail,        |       |
| 26 |                         |     |                                                             |       |
| 27 |                         |     | triangulation); rationale                                   |       |
| 28 |                         |     |                                                             |       |
| 29 |                         |     |                                                             |       |
| 30 |                         |     |                                                             |       |
| 31 | Syntheses and           | #16 | Main findings (e.g. interpretations, inferences, and        | 14-28 |
| 32 |                         |     |                                                             |       |
| 33 | interpretation          |     | themes); might include development of a theory or           |       |
| 34 |                         |     |                                                             |       |
| 35 |                         |     | model, or integration with prior research or theory         |       |
| 36 |                         |     |                                                             |       |
| 37 |                         |     |                                                             |       |
| 38 |                         |     |                                                             |       |
| 39 | Links to empirical data | #17 | Evidence (e.g. quotes, field notes, text excerpts,          | 21-28 |
| 40 |                         |     |                                                             |       |
| 41 |                         |     | photographs) to substantiate analytic findings              |       |
| 42 |                         |     |                                                             |       |
| 43 |                         |     |                                                             |       |
| 44 | Intergration with prior | #18 | Short summary of main findings; explanation of how          | 29-32 |
| 45 |                         |     |                                                             |       |
| 46 | work, implications,     |     | findings and conclusions connect to, support, elaborate     |       |
| 47 |                         |     |                                                             |       |
| 48 | transferability and     |     | on, or challenge conclusions of earlier scholarship;        |       |
| 49 |                         |     |                                                             |       |
| 50 | contribution(s) to the  |     | discussion of scope of application / generalizability;      |       |
| 51 |                         |     |                                                             |       |
| 52 | field                   |     | identification of unique contributions(s) to scholarship in |       |
| 53 |                         |     |                                                             |       |
| 54 |                         |     | a discipline or field                                       |       |
| 55 |                         |     |                                                             |       |
| 56 |                         |     |                                                             |       |
| 57 |                         |     |                                                             |       |
| 58 |                         |     |                                                             |       |
| 59 |                         |     |                                                             |       |
| 60 |                         |     |                                                             |       |

|    |                       |     |                                                          |    |
|----|-----------------------|-----|----------------------------------------------------------|----|
| 1  | Limitations           | #19 | Trustworthiness and limitations of findings              | 33 |
| 2  |                       |     |                                                          |    |
| 3  |                       |     |                                                          |    |
| 4  | Conflicts of interest | #20 | Potential sources of influence of perceived influence on | 37 |
| 5  |                       |     | study conduct and conclusions; how these were            |    |
| 6  |                       |     | managed                                                  |    |
| 7  |                       |     |                                                          |    |
| 8  |                       |     |                                                          |    |
| 9  |                       |     |                                                          |    |
| 10 |                       |     |                                                          |    |
| 11 |                       |     |                                                          |    |
| 12 | Funding               | #21 | Sources of funding and other support; role of funders in | 37 |
| 13 |                       |     | data collection, interpretation and reporting            |    |
| 14 |                       |     |                                                          |    |
| 15 |                       |     |                                                          |    |
| 16 |                       |     |                                                          |    |
| 17 |                       |     |                                                          |    |
| 18 |                       |     |                                                          |    |
| 19 |                       |     |                                                          |    |
| 20 |                       |     |                                                          |    |
| 21 |                       |     |                                                          |    |
| 22 |                       |     |                                                          |    |
| 23 |                       |     |                                                          |    |
| 24 |                       |     |                                                          |    |
| 25 |                       |     |                                                          |    |
| 26 |                       |     |                                                          |    |
| 27 |                       |     |                                                          |    |
| 28 |                       |     |                                                          |    |
| 29 |                       |     |                                                          |    |
| 30 |                       |     |                                                          |    |
| 31 |                       |     |                                                          |    |
| 32 |                       |     |                                                          |    |
| 33 |                       |     |                                                          |    |
| 34 |                       |     |                                                          |    |
| 35 |                       |     |                                                          |    |
| 36 |                       |     |                                                          |    |
| 37 |                       |     |                                                          |    |
| 38 |                       |     |                                                          |    |
| 39 |                       |     |                                                          |    |
| 40 |                       |     |                                                          |    |
| 41 |                       |     |                                                          |    |
| 42 |                       |     |                                                          |    |
| 43 |                       |     |                                                          |    |
| 44 |                       |     |                                                          |    |
| 45 |                       |     |                                                          |    |
| 46 |                       |     |                                                          |    |
| 47 |                       |     |                                                          |    |
| 48 |                       |     |                                                          |    |
| 49 |                       |     |                                                          |    |
| 50 |                       |     |                                                          |    |
| 51 |                       |     |                                                          |    |
| 52 |                       |     |                                                          |    |
| 53 |                       |     |                                                          |    |
| 54 |                       |     |                                                          |    |
| 55 |                       |     |                                                          |    |
| 56 |                       |     |                                                          |    |
| 57 |                       |     |                                                          |    |
| 58 |                       |     |                                                          |    |
| 59 |                       |     |                                                          |    |
| 60 |                       |     |                                                          |    |

The SRQR checklist is distributed with permission of Wolters Kluwer © 2014 by the Association of American Medical Colleges. This checklist was completed on 26. November 2018 using <http://www.goodreports.org/>, a tool made by the [EQUATOR Network](#) in collaboration with [Penelope.ai](#)
